# Supplementary material for: Palladium-catalyzed highly diastereoselective cascade dihalogenation of alkyne-tethered cyclohexadienones via Umpolung of palladium enolate
Source: Royal Society of Chemistry journal article supplement (doi:10.1039/c9cc07164d), 2019-01-01

## Supporting Information

### Palladium-Catalyzed Highly Diastereoselective Cascade Dihalogenation of Alkyne-tethered Cyclohexadienones *via* Umpolung of Palladium Enolate

Anurag Singh, Rahul K. Shukla and Chandra M. R. Volla\*

*Department of Chemistry, Indian Institute of Technology Bombay,  
Powai, Mumbai 400076, India  
E-mail: chandra.volla@chem.iitb.ac.in*

#### Table of Contents:

|                                                                                              |                |
|----------------------------------------------------------------------------------------------|----------------|
| <b>1) Methods</b>                                                                            | <b>S2</b>      |
| <b>2) Experimental Procedures</b>                                                            |                |
| <b>a) General Procedure for the Dearomatization of Substituted Phenols</b>                   | <b>S4</b>      |
| <b>b) General Procedure for the Sonogashira Coupling and References</b>                      | <b>S4</b>      |
| <b>c) Optimization Details</b>                                                               | <b>S5</b>      |
| <b>d) General Procedure for Palladium Catalyzed Dichlorination and Characterization Data</b> | <b>S5-S19</b>  |
| <b>e) General Procedure for Palladium Catalyzed Dibromination and Characterization Data</b>  | <b>S20-S32</b> |
| <b>3) Gram-scale Reaction</b>                                                                | <b>S32-S33</b> |
| <b>4) Characterization Data</b>                                                              | <b>S33-S34</b> |
| <b>5) Functionalization</b>                                                                  | <b>S34-S38</b> |
| <b>6) Mechanistic Study</b>                                                                  | <b>S38-S39</b> |
| <b>7) <sup>1</sup>H and <sup>13</sup>C NMR Spectra of the Compounds</b>                      | <b>S40-S84</b> |

## 1: Methods:

All reactions were carried out under nitrogen atmosphere in screw cap reaction tubes and the workups were performed under air. All the solvents used for the reactions were dried by following the reported procedures. Unless otherwise noted, all materials were purchased from commercial suppliers and used as received. All alkyne-tethered Cyclohexadienone were prepared in lab using conventional procedure. Reactions were monitored using thin-layer chromatography (SiO<sub>2</sub>). A gradient elution using petroleum ether and ethyl acetate was performed based on Merck aluminium TLC sheets (silica gel 60F254). TLC plates were visualized with UV light (254 nm) or KMnO<sub>4</sub> stain or Anisaldehyde stain. For column chromatography, silica gel (100–200 mesh) from SRL Co. was used. NMR studies were performed on Bruker Advance DPX at 400 MHz (<sup>1</sup>H) or 500 MHz (<sup>1</sup>H) and at 100 MHz (<sup>13</sup>C) or 125 MHz (<sup>13</sup>C), respectively. Chemical shifts ( $\delta$ ) are reported in ppm, using the residual solvent peak in CDCl<sub>3</sub> ( $\delta$ H = 7.26 and  $\delta$ C = 77.16) ppm as internal standards, and coupling constants (*J*) are given in Hz. HRMS were recorded with Bruker MaXis impact mass spectrometer using ESI-TOF techniques. Melting points were measured with Buchi Melting Point B-545. FTIR measurements were performed on an Agilent Cary 630 FTIR Spectrometer.

### Alkyne tethered cyclohexadienone:

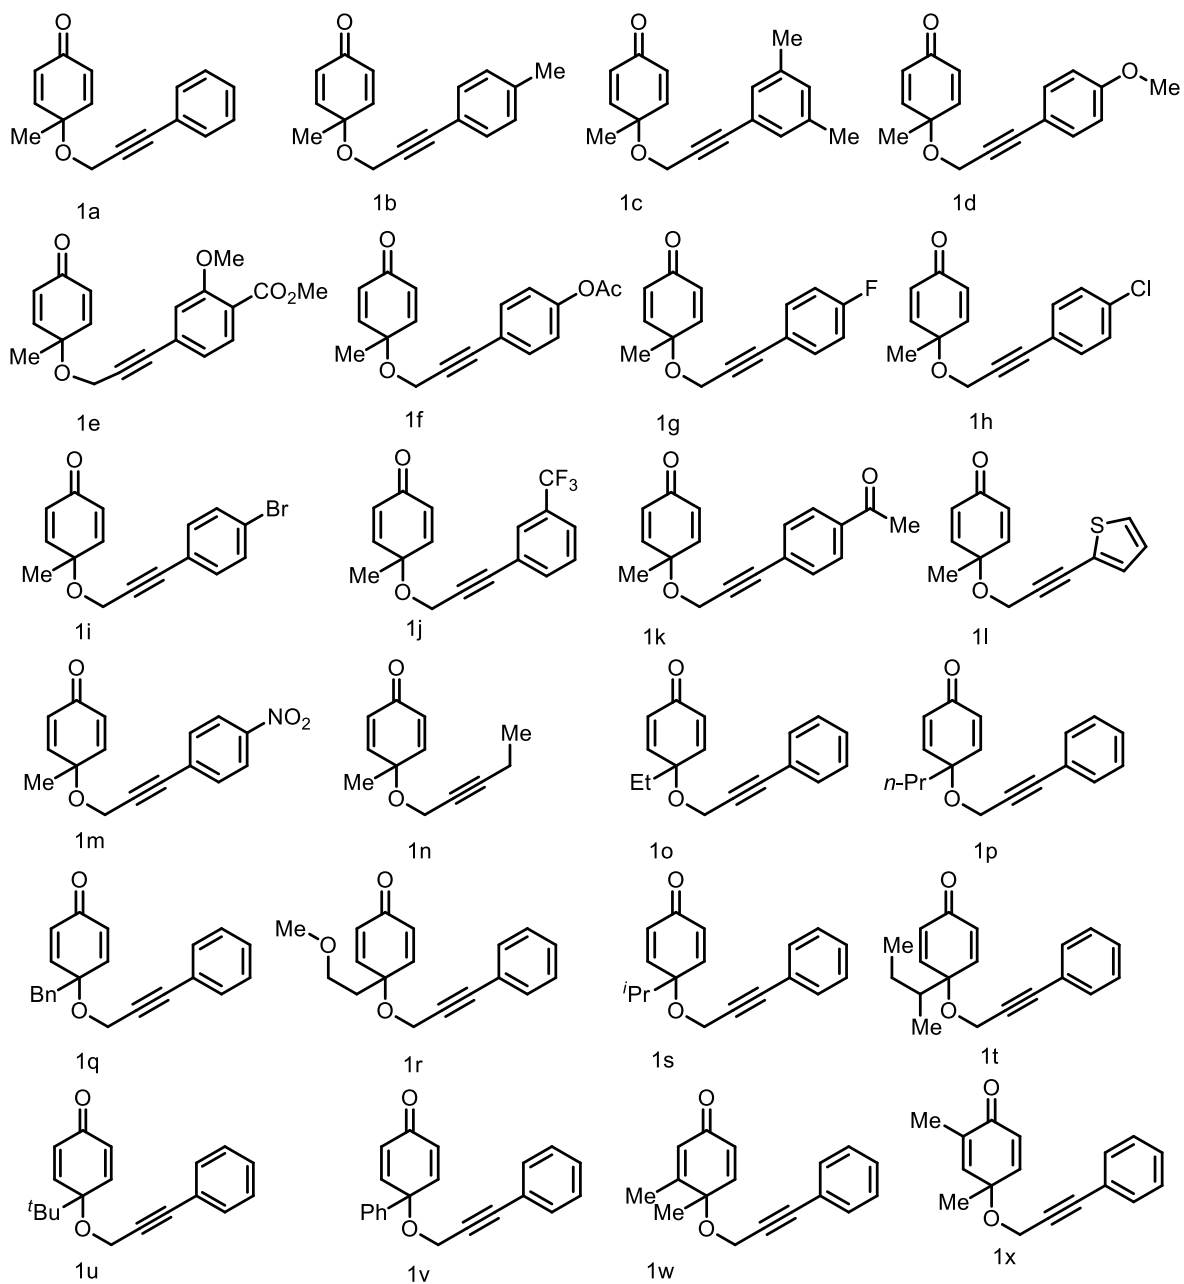

## 2) Experimental procedures and analytical data

### General procedure for the synthesis of *O*-tethered alkynes:

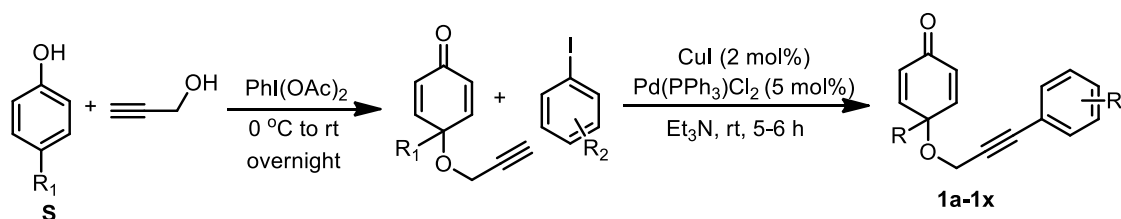

#### a) General procedure for the dearomatization of substituted Phenols:

To a stirred solution of 4-substituted phenol **S** (1.0 mmol) in 1 mL of propargyl alcohol was added phenyliodine(III)diacetate (1.5 mmol) in several portions at  $0\text{ }^\circ\text{C}$ . The resulting reaction mixture was stirred at room temperature for overnight. Then the reaction mixture was diluted with water (10 mL) and extracted with ethyl acetate (15 mL  $\times$  3). The combined organic solvent was washed with brine (15 mL), dried ( $\text{Na}_2\text{SO}_4$ ), filtered, and concentrated in vacuo. The crude reaction mixture was purified by column chromatography (EtOAc/hexane) to give the desired products.

#### b) General procedure for the Sonogashira coupling of **1a-1x**.<sup>1,2</sup>

To a solution of *O*-tethered alkyne **1a** (10.0 mmol) in degassed  $\text{Et}_3\text{N}$  (1 M, 10 mL) was added  $\text{Pd}(\text{PPh}_3)_2\text{Cl}_2$  (3 mol%),  $\text{CuI}$  (1.5 mol%) and aryl iodide (12 mmol). The mixture was stirred at room temperature for 3-5 hours. The reaction was cooled to room temperature, water (50 mL) was added, and the mixture was extracted with EtOAc (3  $\times$  40 mL). The combined organic solvent was washed with 10% aqueous HCl (20 mL), dried ( $\text{Na}_2\text{SO}_4$ ), filtered, and concentrated *in vacuo*. The mixture was purified by column chromatography (EtOAc/hexane) to give aryl substituted alkynes **1a-1x** in high yields.

### References:

- 1) Gollapelli, K. K.; Donikela, S.; Manjula, N.; Chegondi, R. *ACS Catal.* **2018**, *8*, 1440–1447.
- 2) He, Z.-T.; Tian, B.; Fukui, Y.; Tong, X.; Tian, P. Lin, G.-Q. *Angew. Chem., Int. Ed.* **2013**, *52*, 5314–5318.

## Optimization of reaction condition<sup>a</sup> :

Table 1: Optimization of reaction conditions<sup>a</sup>

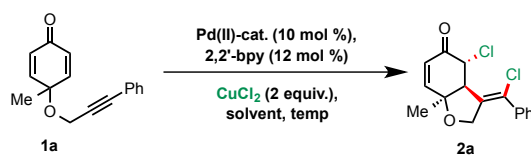

| entry | Pd(II)-cat.                                         | Solvent            | temp (°C) | yield (%) <sup>b</sup>     |
|-------|-----------------------------------------------------|--------------------|-----------|----------------------------|
| 1     | Pd(OAc) <sub>2</sub>                                | DCE                | Rt        | 0 <sup>c</sup>             |
| 2     | Pd(OAc) <sub>2</sub>                                | DCE                | 50        | 18 <sup>c</sup>            |
| 3     | Pd(OAc) <sub>2</sub>                                | DCE                | 50        | 45                         |
| 4     | Pd(OAc) <sub>2</sub>                                | DCE                | 70        | 65 (60) <sup>d</sup>       |
| 5     | Pd(OAc) <sub>2</sub>                                | DCE                | 100       | 57                         |
| 6     | Pd(OAc) <sub>2</sub>                                | 1,4-dioxane        | 70        | 40                         |
| 7     | Pd(OAc) <sub>2</sub>                                | CH <sub>3</sub> CN | 70        | trace                      |
| 8     | Pd(OAc) <sub>2</sub>                                | DMF                | 70        | 19                         |
| 9     | Pd(OAc) <sub>2</sub>                                | Toluene            | 70        | 32                         |
| 10    | Pd(OAc) <sub>2</sub>                                | DME                | 70        | 82                         |
| 11    | <b>Pd(OAc)<sub>2</sub></b>                          | <b>THF</b>         | <b>70</b> | <b>93 (91)<sup>d</sup></b> |
| 12    | PdCl <sub>2</sub>                                   | THF                | 70        | 90                         |
| 13    | Pd(CH <sub>3</sub> CN) <sub>2</sub> Cl <sub>2</sub> | THF                | 70        | 88                         |
| 14    | Pd(OAc) <sub>2</sub>                                | THF                | 70        | 54 <sup>e</sup>            |
| 15    | Pd(OAc) <sub>2</sub>                                | THF                | 70        | 68 <sup>f</sup>            |
| 16    | Pd(OAc) <sub>2</sub>                                | THF                | 70        | 0 <sup>g</sup>             |
| 17    | -                                                   | THF                | 70        | 10                         |

Reaction conditions: [a] **1a** (0.2 mmol), CuCl<sub>2</sub> (2 equiv.), Pd(II)-catalyst (10 mol%), 2,2'-bpy (12 mol%); [b] yield is based on **1a**, determined by <sup>1</sup>H NMR using 1,3,5 trimethoxybenzene as the internal standard; [c] without using 2,2'-bpy; [d] yield in parenthesis refers to isolated yield; [e] 5 mol% Pd(II)-catalyst and 6 mol% of 2,2'-bpy; [f] 1,10-Phenanthroline was used instead of 2,2'-bpy; [g] LiCl was used instead of CuCl<sub>2</sub>.

## c) General procedure for palladium catalysed dichlorination of alkyne-tethered cyclohexadienones

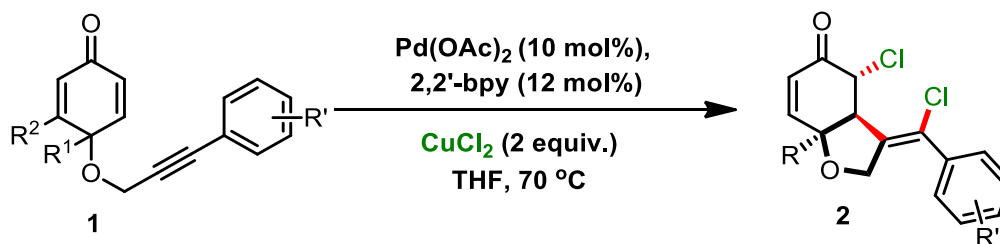

A dried reaction tube was charged with Pd(OAc)<sub>2</sub> ( 4.49 mg, 10 mol% ), 2,2'-bpy (3.56 mg, 12 mol%), CuCl<sub>2</sub> (68 mg, 2equiv) , and **1** (.2 mmol, 1 equiv) and anhydrous THF (2 mL, .2M) under nitrogen atmosphere. After that mixture was stirred at room temperature for 10 min, reaction mixture was kept at 70 °C for 8-12 hour. After the completion of reaction as observed by TLC, solvent was evaporated under reduced pressure. The residue was purified by silica gel (100-200 mesh, hexane/ethylacetate) column chromatography to afford the desired product.

### Characterization Data:

**2a.**

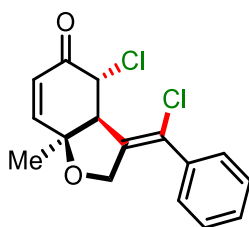

**(E)-4-chloro-3-(chloro(phenyl)methylene)-7a-methyl-2,3,3a,4-tetrahydrobenzofuran-5(7aH)-one**

56.03 mg, 91% yield, colorless liquid.

**I.R. (CHCl<sub>3</sub>):**  $\nu$  3016, 2995, 2985, 1690, 1467, 1586, 1210, 1098, 1084, 668 cm<sup>-1</sup>.

**<sup>1</sup>H NMR (400 MHz, CDCl<sub>3</sub>):**  $\delta$  7.41 – 7.32 (m, 3H), 7.33 – 7.20 (m, 2H), 6.54 (dd,  $J$  = 10.4, 1.3 Hz, 1H), 6.21 (dd,  $J$  = 10.4, 1.1 Hz, 1H), 5.05 (dd,  $J$  = 2.8, 1.1 Hz, 1H), 4.22 (dd,  $J$  = 12.9, 2.1 Hz, 1H), 4.13 (d,  $J$  = 12.9 Hz, 1H), 3.62 (t,  $J$  = 3.0 Hz, 1H), 1.72 (s, 3H).

**<sup>13</sup>C NMR (100 MHz, CDCl<sub>3</sub>):**  $\delta$  190.61, 149.50, 137.17, 135.82, 129.72, 129.64, 128.53, 127.98, 127.15, 79.36, 68.53, 55.90, 54.07, 25.99.

**HRMS (ESI):** C<sub>16</sub>H<sub>14</sub>Cl<sub>2</sub>NaO<sub>2</sub>[M+Na]<sup>+</sup>, calculated = 331.0263, found = 331.0265.

**2b.**

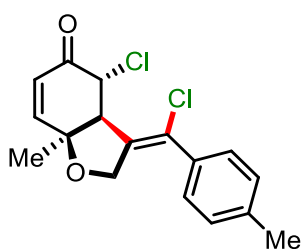

**(E)-4-chloro-3-(chloro(p-tolyl)methylene)-7a-methyl-2,3,3a,4-tetrahydrobenzofuran-5(7aH)-one.**

57.96 mg, 90 % yield, white solid.

**Melting point:** 131-133 °C.

**I.R. (Solid):**  $\nu$  3018, 2975, 2854, 1687, 1445, 1559, 1215, 1095, 1065, 689  $\text{cm}^{-1}$ .

**$^1\text{H}$  NMR (400 MHz,  $\text{CDCl}_3$ ):**  $\delta$  7.15 (s, 4H), 6.54 (d,  $J$  = 10.3 Hz, 1H), 6.21 (d,  $J$  = 10.4 Hz, 1H), 4.95 (d,  $J$  = 77.9 Hz, 1H), 4.21 (d,  $J$  = 12.6 Hz, 1H), 4.13 (d,  $J$  = 12.8 Hz, 1H), 3.61 (s, 1H), 2.35 (s, 3H), 1.72 (s, 3H).

**$^{13}\text{C}$  NMR (100 MHz,  $\text{CDCl}_3$ ):**  $\delta$  190.75, 149.57, 139.87, 135.08, 134.41, 129.97, 129.21, 127.93, 127.18, 79.38, 68.62, 55.92, 54.12, 26.03, 21.42.

**HRMS (ESI):**  $\text{C}_{17}\text{H}_{16}\text{Cl}_2\text{NaO}_2$  [ $\text{M} + \text{Na}$ ] $^+$ , Calculated = 345.0420, Found = 345.0421.

**2c.**

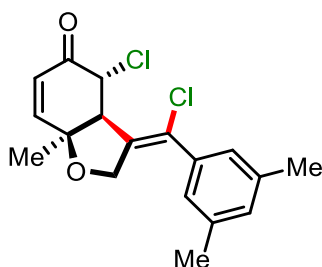

**(E)-4-chloro-3-(chloro(3,5-dimethylphenyl)methylene)-7a-methyl-2,3,3a,4-tetrahydrobenzofuran-5(7aH)-one**

66.61 mg, 91% yield, colorless liquid.

**I.R. ( $\text{CHCl}_3$ ):**  $\nu$  3015, 2993, 2881, 1693, 1207, 1446, 1556, 1216, 1088, 1098, 669  $\text{cm}^{-1}$ .

**$^1\text{H}$  NMR (500 MHz,  $\text{CDCl}_3$ ):**  $\delta$  6.98 (s,  $J$  = 0.6 Hz, 1H), 6.86 (s, 2H), 6.53 (dd,  $J$  = 10.4, 1.4 Hz, 1H), 6.21 (dd,  $J$  = 10.4, 1.2 Hz, 1H), 5.05 (dd,  $J$  = 2.8, 1.2 Hz, 1H), 4.18 (dd,  $J$  = 12.9, 2.1 Hz, 1H), 4.12 (d,  $J$  = 12.8 Hz, 1H), 3.66 – 3.55 (m, 1H), 2.30 (d,  $J$  = 0.5 Hz, 6H), 1.71 (s, 3H).

**$^{13}\text{C}$  NMR (125 MHz,  $\text{CDCl}_3$ ):**  $\delta$  190.76, 149.55, 138.20, 137.18, 135.27, 131.32, 130.06, 127.16, 125.76, 79.35, 68.59, 55.83, 54.14, 26.03, 21.33.

**HRMS (ESI):**  $\text{C}_{18}\text{H}_{18}\text{Cl}_2\text{NaO}_2$  [ $\text{M} + \text{Na}$ ] $^+$ , Calculated = 359.0576, found = 359.0574.

2d.

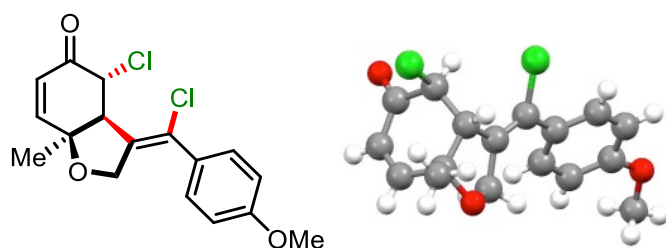

**(E)-4-chloro-3-(chloro(4-methoxyphenyl)methylene)-7a-methyl-2,3,3a,4-tetrahydrobenzofuran-5(7aH)-one**

60.72 mg, 92% yield, white solid.

**Melting Point:** 126-128 °C.

**I.R. (Solid):**  $\nu$  3018, 2975, 2984, 1687, 1454, 1556, 1215, 1115, 1098, 678  $\text{cm}^{-1}$ .

**$^1\text{H}$  NMR (400 MHz,  $\text{CDCl}_3$ ):**  $\delta$  7.22 – 7.15 (m, 2H), 6.91 – 6.82 (m, 2H), 6.54 (dd,  $J$  = 10.4, 1.4 Hz, 1H), 6.20 (dd,  $J$  = 10.4, 1.2 Hz, 1H), 5.04 (dd,  $J$  = 2.8, 1.2 Hz, 1H), 4.20 (dd,  $J$  = 12.7, 2.1 Hz, 1H), 4.13 (d,  $J$  = 12.7 Hz, 1H), 3.82 (s, 3H), 3.61 (t,  $J$  = 3.0 Hz, 1H), 1.72 (s, 3H)..

**$^{13}\text{C}$  NMR (100 MHz,  $\text{CDCl}_3$ ):**  $\delta$  190.80, 163.59, 160.53, 149.57, 146.92, 134.35, 129.78, 129.49, 127.17, 113.87, 79.39, 68.64, 55.93, 55.52, 54.15, 26.03.

**HRMS (ESI):**  $\text{C}_{17}\text{H}_{16}\text{Cl}_2\text{KO}_3[\text{M} + \text{K}]^+$ , Calculated = 377.0108, Found = 377.0109.

*Crystal structure of this compound is reported (CCDC: 1913347).*

2e.

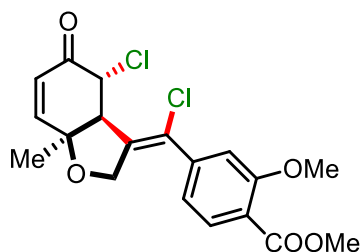

**(E)-chloro((3aS,4R,7aS)-4-chloro-7a-methyl-5-oxo-4,5-dihydrobenzofuran-3(2H,3aH,7aH)-ylidene)methyl)-2-methoxybenzoate**

70.31 mg, 89% yield, white solid.



**Melting Point:** 115-117 °C.

**I.R. (Solid):**  $\nu$  3021, 2988, 2884, 1775, 1755, 1695, 1586, 1453, 1209, 1075, 1031, 669  $\text{cm}^{-1}$ .

**$^1\text{H}$  NMR (400 MHz,  $\text{CDCl}_3$ ):**  $\delta$  7.67 (d,  $J = 2.5$  Hz, 1H), 7.38 (dd,  $J = 8.7, 2.5$  Hz, 1H), 6.95 (d,  $J = 8.8$  Hz, 1H), 6.54 (dd,  $J = 10.4, 1.3$  Hz, 1H), 6.21 (dd,  $J = 10.4, 1.1$  Hz, 1H), 5.02 (dd,  $J = 2.8, 1.1$  Hz, 1H), 4.20 (dd,  $J = 12.8, 2.1$  Hz, 1H), 4.11 (d,  $J = 12.8$  Hz, 1H), 3.92 (s, 3H), 3.89 (s, 3H), 3.60 (t,  $J = 3.0$  Hz, 1H), 1.71 (s, 3H).

**$^{13}\text{C}$  NMR (100 MHz,  $\text{CDCl}_3$ ):**  $\delta$  190.70, 149.07, 133.48, 131.76, 127.19, 112.02, 79.26, 68.61, 57.62, 56.34, 52.41, 43.45, 25.78.

**HRMS (ESI):**  $\text{C}_{19}\text{H}_{18}\text{Cl}_2\text{NaO}_5[\text{M} + \text{Na}]^+$ , Calculated = 419.0424; Found = 419.0426.

**2f.**

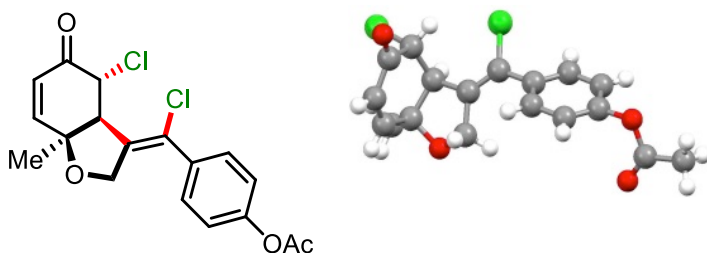

**(E)-chloro((3a*S*,4*R*,7a*S*)-4-chloro-7a-methyl-5-oxo-4,5-dihydrobenzofuran-3(2*H*,3a*H*,7a*H*)-ylidene)methyl)phenyl acetate**

64.80 mg, 90% yield, white solid.

**Melting Point:** 115-117 °C.

**I.R. (Solid):**  $\nu$  3019, 2998, 2886, 1771, 1751, 1697, 1458, 1589, 1215, 1078, 1035, 669  $\text{cm}^{-1}$ .

**$^1\text{H}$  NMR (400 MHz,  $\text{CDCl}_3$ ):**  $\delta$  7.31 – 7.27 (m, 2H), 7.13 – 7.07 (m, 2H), 6.54 (dd,  $J = 10.4, 1.4$  Hz, 1H), 6.21 (dd,  $J = 10.4, 1.1$  Hz, 1H), 5.03 (dd,  $J = 2.9, 1.2$  Hz, 1H), 4.21 (dd,  $J = 12.9, 2.0$  Hz, 1H), 4.15 (d,  $J = 12.9$  Hz, 1H), 3.62 (dt,  $J = 3.0, 1.7$  Hz, 1H), 2.30 (s, 3H), 1.72 (s, 3H).

**$^{13}\text{C}$  NMR (100 MHz,  $\text{CDCl}_3$ ):**  $\delta$  190.58, 169.18, 151.43, 149.48, 136.19, 134.68, 129.23, 128.81, 127.19, 121.77, 79.40, 68.49, 55.96, 54.04, 29.82, 25.99, 21.25.

**HRMS (ESI):**  $\text{C}_{18}\text{H}_{16}\text{Cl}_2\text{NaO}_4[\text{M} + \text{Na}]^+$ , Calculated = 389.0318; Found = 389.0314.

**Crystal structure of this compound is reported (CCDC: 1913321).**

2g.

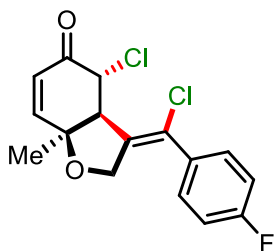

**(E)-4-chloro-3-(chloro(4-fluorophenyl)methylene)-7a-methyl-2,3,3a,4-tetrahydrobenzofuran-5(7aH)-one.**

55.16 mg, 85% yield, colorless liquid

**I.R. (CHCl<sub>3</sub>):**  $\nu$  3016, 2915, 2816, 1698, 1467, 1598, 1219, 1091, 1076, 662 cm<sup>-1</sup>.

**<sup>1</sup>H NMR (400 MHz, CDCl<sub>3</sub>):**  $\delta$  7.33 – 7.22 (m, 2H), 7.04 (t,  $J$  = 8.5 Hz, 2H), 6.54 (d,  $J$  = 10.4 Hz, 1H), 6.21 (d,  $J$  = 10.4 Hz, 1H), 5.02 (d,  $J$  = 2.6 Hz, 1H), 4.19 (dd,  $J$  = 12.8, 1.8 Hz, 1H), 4.10 (d,  $J$  = 12.8 Hz, 1H), 3.60 (s, 1H), 1.72 (s, 3H).

**<sup>13</sup>C NMR (100 MHz, CDCl<sub>3</sub>):**  $\delta$  190.45 (s), 163.07 (d,  $J$  = 250.5 Hz), 149.30 (s), 135.91 (s), 133.21 (s), 129.92 (s), 129.84 (s), 128.53 (s), 127.09 (s), 115.67 (s), 115.46 (s), 79.35 (s), 68.34 (s), 55.79 (s), 53.88 (s), 25.87 (s).

**HRMS (ESI):** C<sub>16</sub>H<sub>13</sub>Cl<sub>2</sub>FKO<sub>2</sub>[M+K]<sup>+</sup>, Calculated = 364.9908, Found = 364.9905.

2h.

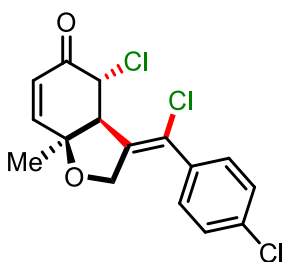

**(E)-4-chloro-3-(chloro(4-chlorophenyl)methylene)-7a-methyl-2,3,3a,4-tetrahydrobenzofuran-5(7aH)-on**

57.27 mg, 83% yield, White solid.

**Melting point:** 136-138 °C.

**I.R. (Solid):**  $\nu$  3019, 2926, 2876, 1697, 1456, 1578, 1210, 1094, 1081, 668 cm<sup>-1</sup>.

**<sup>1</sup>H NMR (400 MHz, CDCl<sub>3</sub>):** δ 7.36 – 7.30 (m, 2H), 7.22 – 7.16 (m, 2H), 6.54 (dd, *J* = 10.4, 1.3 Hz, 1H), 6.21 (dd, *J* = 10.4, 1.1 Hz, 1H), 5.02 (dd, *J* = 2.8, 1.1 Hz, 1H), 4.19 (dd, *J* = 12.9, 2.1 Hz, 1H), 4.10 (d, *J* = 12.9 Hz, 1H), 3.61 (t, *J* = 3.0 Hz, 1H), 1.72 (s, 3H).

**<sup>13</sup>C NMR (100 MHz, CDCl<sub>3</sub>):** δ 190.53, 149.42, 136.58, 135.72, 135.62, 129.33, 128.86, 128.56, 127.25, 79.47, 68.45, 55.98, 53.96, 26.01

**HRMS (ESI):** C<sub>16</sub>H<sub>13</sub>Cl<sub>3</sub>NaO<sub>2</sub>[M+ Na]<sup>+</sup>, Calculated = 364.9873, Found = 364.9870.

2i.

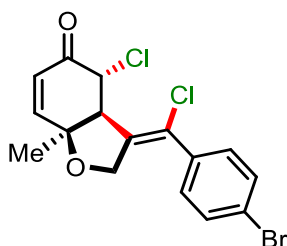

**(E)-3-((4-bromophenyl)chloromethylene)-4-chloro-7a-methyl-2,3,3a,4-tetrahydrobenzofuran-5(7aH)-one.**

67.13 mg, 87% yield, white solid

**Melting Point:** 171 °C.

**<sup>1</sup>H NMR (500 MHz, CDCl<sub>3</sub>):** δ 7.51 (d, *J* = 8.3 Hz, 2H), 7.16 (d, *J* = 8.3 Hz, 2H), 6.56 (d, *J* = 10.4 Hz, 1H), 6.23 (d, *J* = 10.4 Hz, 1H), 5.02 (d, *J* = 21.8 Hz, 1H), 4.21 (d, *J* = 12.9 Hz, 1H), 4.13 (d, *J* = 12.9 Hz, 1H), 3.62 (s, 1H), 1.74 (s, 3H)..

**<sup>13</sup>C NMR (125 MHz, CDCl<sub>3</sub>):** δ 190.46, 149.39, 136.63, 136.03, 131.78, 129.52, 128.54, 127.21, 123.92, 79.42, 68.40, 55.95, 53.90.

**HRMS (ESI):** C<sub>16</sub>H<sub>14</sub>BrCl<sub>2</sub>NaO<sub>2</sub>[M+ Na]<sup>+</sup>, Calculated = 408.9368, Found = 408.9364.

2j.

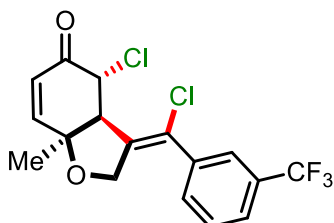

**(E)-4-chloro-3-(chloro(3-(trifluoromethyl)phenyl)methylene)-7a-methyl-2,3,3a,4-tetrahydrobenzofuran-5(7aH)-one.**

56.94 mg, 78% yield, yellow liquid.

**I.R. (CHCl<sub>3</sub>):**  $\nu$  3019, 2976, 2954, 1687, 1498, 1567, 1216, 1123, 1055, 669 cm<sup>-1</sup>.

**<sup>1</sup>H NMR (500 MHz, CDCl<sub>3</sub>):**  $\delta$  7.62 (d,  $J$  = 7.7 Hz, 1H), 7.51 (dd,  $J$  = 16.9, 9.0 Hz, 2H), 7.43 (d,  $J$  = 7.8 Hz, 1H), 6.55 (d,  $J$  = 10.5 Hz, 1H), 6.23 (d,  $J$  = 10.5 Hz, 1H), 5.04 – 5.02 (m, 1H), 4.22 (dd,  $J$  = 13.0, 1.7 Hz, 1H), 4.10 (d,  $J$  = 12.9 Hz, 1H), 3.63 (s, 1H), 1.72 (s, 3H)..

**<sup>13</sup>C NMR (125 MHz, CDCl<sub>3</sub>):**  $\delta$  190.41, 149.36, 137.97, 137.76, 131.26, 129.24, 128.00, 127.31, 126.38, 126.35, 124.86, 124.83, 122.64, 115.20, 79.53, 68.32, 56.05, 53.93, 26.00.

**HRMS (ESI):** C<sub>17</sub>H<sub>13</sub>Cl<sub>2</sub>F<sub>3</sub>NaO<sub>2</sub> [M+ Na]<sup>+</sup>, Calculated = 399.0137, Found = 399.0139.

**2k.**

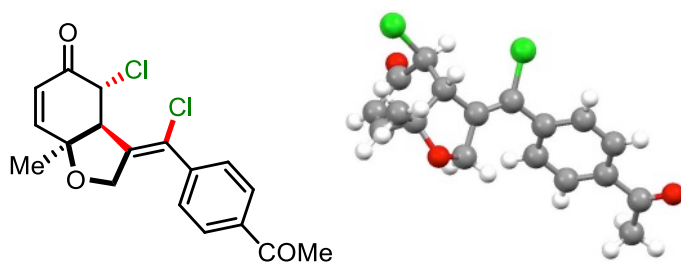

**(E)-3-((4-acetylphenyl)chloromethylene)-4-chloro-7a-methyl-2,3,3a,4-tetrahydrobenzofuran-5(7aH)-one.**

49.56 mg, 84% yield, white solid.

**Meting Point:** 116-118 °C.

**I.R. (Solid):**  $\nu$  3019, 2975, 2852, 1686, 1697, 1445, 1556, 1216, 1098, 1084, 668 cm<sup>-1</sup>.

**<sup>1</sup>H NMR (400 MHz, CDCl<sub>3</sub>):**  $\delta$  7.93 (d,  $J$  = 7.2 Hz, 2H), 7.36 (d,  $J$  = 7.2 Hz, 2H), 6.55 (d,  $J$  = 10.4 Hz, 1H), 6.22 (d,  $J$  = 10.4 Hz, 1H), 5.03 – 5.02 (m, 1H), 4.23 (d,  $J$  = 13.0 Hz, 1H), 4.12 (dd,  $J$  = 13.0, 1.2 Hz, 1H), 3.63 (s, 1H), 2.60 (d,  $J$  = 1.4 Hz, 3H), 1.72 (d,  $J$  = 1.2 Hz, 3H)..

**<sup>13</sup>C NMR (100 MHz, CDCl<sub>3</sub>):**  $\delta$  197.27, 190.45, 149.39, 141.36, 137.84, 128.52, 128.29, 127.29, 79.45, 68.44, 56.09, 53.92, 26.82, 26.00.

**HRMS (ESI):** C<sub>18</sub>H<sub>16</sub>Cl<sub>2</sub>NaO<sub>3</sub> [M+Na]<sup>+</sup>, Calculated = 373.0369, Found = 373.0370.

*Crystal structure of this compound is reported (CCDC: 1922350).*

**2l.**

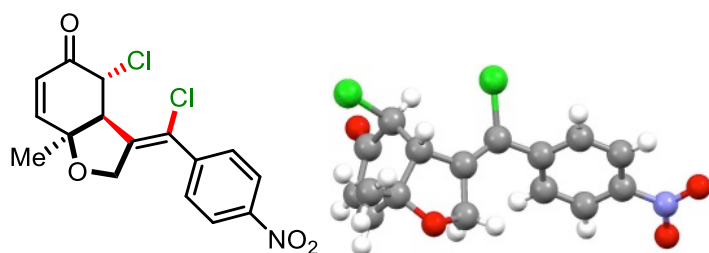

**(E)-4-chloro-3-(chloro(4-nitrophenyl)methylene)-7a-methyl-2,3,3a,4-tetrahydrobenzofuran-5(7aH)-one**

44.88 mg, 68% yield, white solid.

**Melting point:** 149-150 °C.

**I.R. (Solid):**  $\nu$  2954, 2926, 1689, 1522, 1454, 1578, 1348, 1215, 1095, 1013, 699  $\text{cm}^{-1}$ .

**$^1\text{H}$  NMR (400 MHz,  $\text{CDCl}_3$ ):**  $\delta$  8.26 – 8.18 (m, 2H), 7.48 – 7.38 (m, 2H), 6.55 (dd,  $J = 10.5$ , 1.3 Hz, 1H), 6.22 (dd,  $J = 10.4$ , 1.1 Hz, 1H), 5.00 (dd,  $J = 2.8$ , 1.1 Hz, 1H), 4.23 (dd,  $J = 13.1$ , 2.1 Hz, 1H), 4.10 (d,  $J = 13.0$  Hz, 1H), 3.63 (t,  $J = 3.1$  Hz, 1H), 1.72 (s,  $J = 3.7$  Hz, 3H).

**$^{13}\text{C}$  NMR (100 MHz,  $\text{CDCl}_3$ ):**  $\delta$  190.25, 149.24, 143.06, 139.44, 129.06, 127.39, 127.26, 123.90, 79.57, 68.33, 56.22, 53.79, 26.00.

**HRMS (ESI):**  $\text{C}_{16}\text{H}_{13}\text{Cl}_2\text{NNaO}_4[\text{M} + \text{Na}]^+$ , Calculated = 376.0114, Found = 376.0111.

*Crystal structure of this compound is reported (CCDC: 1913363).*

**2m.**

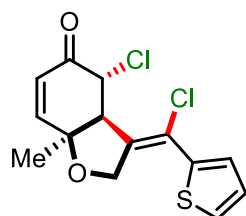

**(E)-4-chloro-3-(chloro(thiophen-2-yl)methylene)-7a-methyl-2,3,3a,4-tetrahydrobenzofuran-5(7aH)-one**

44.53 mg, 73% yield, white solid.

**Melting Point:** 137-139 °C

**I.R. (Solid):**  $\nu$  3020, 2930, 2880, 1698, 1456, 1576, 1217, 1110, 1087, 699  $\text{cm}^{-1}$ .

**$^1\text{H}$  NMR (500 MHz,  $\text{CDCl}_3$ ):**  $\delta$  7.38 (dd,  $J = 4.6, 1.7$  Hz, 1H), 7.06 – 6.98 (m, 2H), 6.56 (dd,  $J = 10.4, 1.3$  Hz, 1H), 6.21 – 6.17 (m, 1H), 5.04 (dd,  $J = 3.1, 1.1$  Hz, 1H), 4.52 (d,  $J = 13.2$  Hz, 1H), 4.25 (dd,  $J = 13.2, 2.4$  Hz, 1H), 3.67 – 3.63 (m, 1H), 1.72 (s, 3H).

**$^{13}\text{C}$  NMR (125 MHz,  $\text{CDCl}_3$ ):**  $\delta$  190.52, 149.48, 139.92, 134.93, 128.29, 127.95, 127.49, 127.15, 123.12, 79.40, 68.87, 56.35, 54.23, 25.97.

**HRMS (ESI):**  $\text{C}_{14}\text{H}_{12}\text{Cl}_2\text{O}_2\text{KS}$   $[\text{M} + \text{K}]^+$ , Calculated = 352.9567, Found = 352.9562.

**2n.**

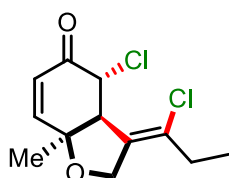

**(E)-4-chloro-3-(1-chloropropylidene)-7a-methyl-2,3,3a,4-tetrahydrobenzofuran-5(7aH)-one**

38.45 mg, 74% yield, yellow liquid.

**I.R. ( $\text{CHCl}_3$ ):**  $\nu$  3037, 2935, 2872, 1691, 1474, 1576, 1211, 1095, 668  $\text{cm}^{-1}$ .

**$^1\text{H}$  NMR (400 MHz,  $\text{CDCl}_3$ ):**  $\delta$  6.49 (dd,  $J = 10.4, 1.3$  Hz, 1H), 6.11 (dd,  $J = 10.4, 1.1$  Hz, 1H), 5.02 (dd,  $J = 3.0, 1.1$  Hz, 1H), 4.35 (d,  $J = 12.4$  Hz, 1H), 4.00 (dd,  $J = 13.3, 1.0$  Hz, 1H), 3.41 (s,  $J = 21.6$  Hz, 1H), 2.23 (q,  $J = 7.3$  Hz, 2H), 1.68 (s, 3H), 1.09 (t,  $J = 7.4$  Hz, 3H).

**$^{13}\text{C}$  NMR (100 MHz,  $\text{CDCl}_3$ ):**  $\delta$  190.72, 149.56, 132.95, 132.37, 126.94, 79.77, 77.48, 54.75, 54.28, 30.84, 25.99, 12.09.

**HRMS (ESI):**  $\text{C}_{12}\text{H}_{14}\text{Cl}_2\text{NaO}_2$   $[\text{M} + \text{Na}]^+$ , Calculated = 283.0263, Found = 283.0265.

**2o.**

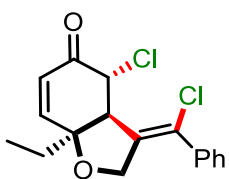

**(E)-4-chloro-3-(chloro(phenyl)methylene)-7a-ethyl-2,3,3a,4-tetrahydrobenzofuran-5(7aH)-one**

54.12 mg, 82% yield, white solid.

**Melting Point:** 118-120 °C.

**I.R. (Solid):**  $\nu$  3015, 2925, 2884, 1695, 1476, 1556, 1120, 1095, 665  $\text{cm}^{-1}$ .

**$^1\text{H}$  NMR (400 MHz,  $\text{CDCl}_3$ ):**  $\delta$  7.39 – 7.31 (m, 3H), 7.30 – 7.23 (m, 2H), 6.63 (dd,  $J = 10.5$ , 1.2 Hz, 1H), 6.24 (dd,  $J = 10.5$ , 1.0 Hz, 1H), 5.04 (dd,  $J = 3.2$ , 1.0 Hz, 1H), 4.25 (dd,  $J = 12.9$ , 2.1 Hz, 1H), 4.14 (d,  $J = 12.9$  Hz, 1H), 3.73 – 3.69 (m, 1H), 2.03 (qq,  $J = 14.7$ , 7.4 Hz, 2H), 1.08 (t,  $J = 7.5$  Hz, 3H).

**$^{13}\text{C}$  NMR (100 MHz,  $\text{CDCl}_3$ ):**  $\delta$  190.97, 148.81, 137.22, 136.04, 129.64, 128.55, 128.04, 127.61, 81.65, 68.47, 54.48, 53.20, 31.31, 7.66.

**HRMS (ESI):**  $\text{C}_{17}\text{H}_{16}\text{Cl}_2\text{NaO}_2$  [ $\text{M} + \text{Na}$ ] $^+$ , Calculated = 345.0420, Found = 345.0417.

**2p.**

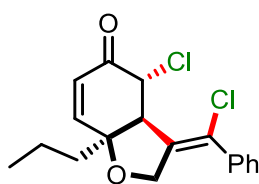

**(E)-4-chloro-3-(chloro(phenyl)methylene)-7a-propyl-2,3,3a,4-tetrahydrobenzofuran-5(7aH)-one**

57.59 mg, 79% yield, white solid.

**Melting Point:** 132-134 °C.

**I.R. ( $\text{CHCl}_3$ ):**  $\nu$  3024, 2928, 2884, 1695, 1487, 1568, 1217, 1095, 669  $\text{cm}^{-1}$ .

**$^1\text{H}$  NMR (400 MHz,  $\text{CDCl}_3$ ):**  $\delta$  7.38 – 7.31 (m, 3H), 7.29 – 7.23 (m, 2H), 6.62 (dd,  $J = 10.5$ , 1.2 Hz, 1H), 6.22 (dd,  $J = 10.5$ , 1.0 Hz, 1H), 5.03 (dd,  $J = 3.0$ , 1.0 Hz, 1H), 4.23 (dd,  $J = 12.9$ , 2.0 Hz, 1H), 4.13 (d,  $J = 12.9$  Hz, 1H), 3.71 (s, 1H), 2.08 – 1.84 (m, 2H), 1.63 – 1.49 (m, 2H), 0.99 (t,  $J = 7.3$  Hz, 3H).

**$^{13}\text{C}$  NMR (100 MHz,  $\text{CDCl}_3$ ):**  $\delta$  190.85, 148.88, 137.17, 135.99, 129.59, 128.50, 127.99, 127.41, 81.48, 68.41, 54.39, 53.73, 40.72, 16.71, 14.55.

**HRMS (ESI):** C<sub>18</sub>H<sub>18</sub>Cl<sub>2</sub>NaO<sub>2</sub>[M+ Na]<sup>+</sup>, Calculated = 359.0576, Found = 359.0572.

**2q.**

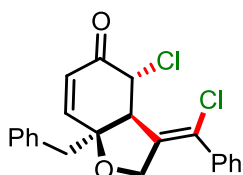

**(E)-7a-benzyl-4-chloro-3-(chloro(phenyl)methylene)-2,3,3a,4-tetrahydrobenzofuran-5(7aH)-one**

60.08 mg, 78% yield, white solid.

**Melting Point:** 142-145 °C.

**I.R. (CHCl<sub>3</sub>):**  $\nu$  3028, 2923, 2881, 1694, 1458, 1567, 1214, 1095, 669 cm<sup>-1</sup>.

**<sup>1</sup>H NMR (500 MHz, CDCl<sub>3</sub>):**  $\delta$  7.46 – 7.10 (m, 10H), 6.53 (dd, *J* = 10.5, 0.9 Hz, 1H), 6.26 (d, *J* = 10.5 Hz, 1H), 5.11 (dd, *J* = 6.6, 4.0 Hz, 1H), 4.25 (dd, *J* = 12.9, 1.9 Hz, 1H), 4.18 (d, *J* = 12.9 Hz, 1H), 3.72 (d, *J* = 10.6 Hz, 1H), 3.42 (d, *J* = 14.2 Hz, 1H), 3.28 (d, *J* = 14.2 Hz, 1H).

**<sup>13</sup>C NMR (125 MHz, CDCl<sub>3</sub>):**  $\delta$  190.79, 148.16, 137.15, 135.56, 135.22, 131.18, 129.61, 128.49, 128.42, 128.00, 127.48, 127.22, 81.34, 68.49, 54.53, 53.47, 44.52.

**HRMS (ESI):** C<sub>22</sub>H<sub>19</sub>Cl<sub>2</sub>O<sub>2</sub>[M+ H]<sup>+</sup>, Calculated = 407.0576, Found = 407.0578.

**2r.**

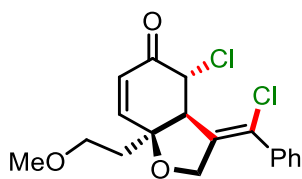

**(E)-4-chloro-3-(chloro(phenyl)methylene)-7a-(3-methoxypropyl)-2,3,3a,4-tetrahydrobenzofuran-5(7aH)-one**

48.49 mg, 71% yield, yellow liquid.

**I.R. (CHCl<sub>3</sub>):**  $\nu$  3023, 2923, 2889, 1695, 1554, 1598, 1217, 1195, 1095, 669 cm<sup>-1</sup>.

**<sup>1</sup>H NMR (400 MHz, CDCl<sub>3</sub>):**  $\delta$  7.39 – 7.32 (m, 3H), 7.30 – 7.21 (m, 2H), 6.70 (dd, *J* = 10.5, 1.3 Hz, 1H), 6.22 (dd, *J* = 10.5, 1.1 Hz, 1H), 5.03 (dd, *J* = 3.2, 1.1 Hz, 1H), 4.24 (dt, *J* = 12.6,



4.0 Hz, 1H), 4.15 (d,  $J = 12.9$  Hz, 1H), 3.85 – 3.79 (m, 1H), 3.72 – 3.58 (m, 2H), 3.35 (s, 3H), 2.41 – 2.29 (m, 1H), 2.23 (dt,  $J = 14.8, 5.9$  Hz, 1H).

$^{13}\text{C}$  NMR (100 MHz,  $\text{CDCl}_3$ ):  $\delta$  190.76, 148.58, 135.62, 129.65, 128.55, 128.02, 127.27, 80.57, 68.51, 67.78, 58.75, 54.69, 38.43.

HRMS (ESI):  $\text{C}_{18}\text{H}_{19}\text{Cl}_2\text{O}_3$  [ $\text{M} + \text{H}$ ] $^+$ , Calculated = 353.0706, Found = 353.0705.

2s.

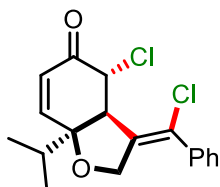

**(E)-4-chloro-3-(chloro(phenyl)methylene)-7a-isopropyl-2,3,3a,4-tetrahydrobenzofuran-5(7aH)-one**

40.34 mg, 63% yield, yellow liquid.

I.R. ( $\text{CHCl}_3$ ):  $\nu$  3036, 2924, 2887, 1698, 1413, 1518, 1216, 1123, 1087, 669  $\text{cm}^{-1}$ .

$^1\text{H}$  NMR (500 MHz,  $\text{CDCl}_3$ ):  $\delta$  7.40 – 7.34 (m, 3H), 7.32 – 7.27 (m, 2H), 6.73 (d,  $J = 10.6$  Hz, 1H), 6.28 (d,  $J = 10.6$  Hz, 1H), 4.91 (d,  $J = 4.6$  Hz, 1H), 4.34 (dd,  $J = 13.0, 1.7$  Hz, 1H), 4.19 (d,  $J = 13.0$  Hz, 1H), 3.86 (d,  $J = 3.7$  Hz, 1H), 2.22 – 2.08 (m, 1H), 1.08 (d,  $J = 6.9$  Hz, 3H), 1.05 (d,  $J = 6.9$  Hz, 3H).

$^{13}\text{C}$  NMR (125 MHz,  $\text{CDCl}_3$ ):  $\delta$  190.88, 147.65, 137.11, 136.59, 129.58, 129.26, 128.53, 128.31, 128.08, 83.80, 68.12, 56.23, 52.24, 34.70, 17.44, 16.99.

HRMS (ESI):  $\text{C}_{18}\text{H}_{18}\text{Cl}_2\text{NaO}_2$  [ $\text{M} + \text{Na}$ ] $^+$ , Calculated = 359.0576, Found = 359.0576.

2t.

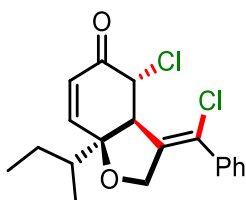

**(E)-7a-((S)-sec-butyl)-4-chloro-3-(chloro(phenyl)methylene)-2,3,3a,4-tetrahydrobenzofuran-5(7aH)-one**

35.70 mg, 51% yield, yellow liquid.

**I.R. (CHCl<sub>3</sub>):**  $\nu$  3020, 2926, 2876, 1691, 1456, 1587, 1216, 1095, 668 cm<sup>-1</sup>.

**<sup>1</sup>H NMR (400 MHz, CDCl<sub>3</sub>):**  $\delta$  7.39 – 7.34 (m, 3H), 7.32 – 7.28 (m, 2H), 6.69 (ddd,  $J$  = 10.5, 4.1, 0.7 Hz, 1H), 6.28 (ddd,  $J$  = 10.5, 3.4, 0.7 Hz, 1H), 4.89 – 4.85 (m, 1H), 4.35 (ddd,  $J$  = 13.0, 4.9, 1.7 Hz, 1H), 4.19 (dd,  $J$  = 13.0, 0.9 Hz, 1H), 3.87 (d,  $J$  = 4.7 Hz, 1H), 1.86 – 1.75 (m, 1H), 1.74 – 1.64 (m, 1H), 1.19 – 1.09 (m, 1H), 1.04 (dd,  $J$  = 17.2, 6.9 Hz, 3H), 0.96 (td,  $J$  = 7.3, 1.4 Hz, 3H).

**<sup>13</sup>C NMR (100 MHz, CDCl<sub>3</sub>):**  $\delta$  190.92, 147.82, 147.72, 137.09, 136.78, 136.72, 129.58, 129.21, 128.53, 128.34, 128.16, 128.10, 84.14, 84.09, 67.97, 67.89, 56.53, 52.46, 52.34, 42.03, 41.80, 24.14, 23.95, 13.84, 13.41, 12.73, 12.58.

**HRMS (ESI):** C<sub>19</sub>H<sub>20</sub>Cl<sub>2</sub>NaO<sub>2</sub>[M+ Na]<sup>+</sup>, Calculated = 373.0733; Found = 373.0731.

**2v.**

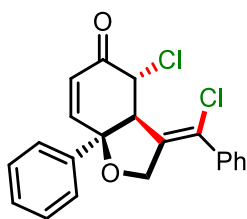

**(E)-4-chloro-3-(chloro(phenyl)methylene)-7a-phenyl-2,3,3a,4-tetrahydrobenzofuran-5(7aH)-one**

48.10 mg, 65% yield, white solid.

**Melting Point:** 151-153 °C.

**I.R. (Solid):**  $\nu$  3034, 2923, 2921, 1697, 1445, 1554, 1216, 1184, 1091, 669 cm<sup>-1</sup>.

**<sup>1</sup>H NMR (400 MHz, CDCl<sub>3</sub>):**  $\delta$  7.52 (dd,  $J$  = 6.8, 1.6 Hz, 1H), 7.44 – 7.32 (m, 6H), 7.31 – 7.25 (m, 3H), 6.78 (dd,  $J$  = 10.4, 2.0 Hz, 1H), 6.45 (dd,  $J$  = 10.4, 2.1 Hz, 1H), 5.03 (d,  $J$  = 3.7 Hz, 1H), 4.53 (d,  $J$  = 12.9 Hz, 1H), 4.41 (dd,  $J$  = 12.9, 2.9 Hz, 1H), 4.02 (s, 1H).

**<sup>13</sup>C NMR (125 MHz, CDCl<sub>3</sub>):**  $\delta$  184.26, 146.55, 141.65, 137.15, 132.75, 132.03, 129.81, 129.15, 128.59, 128.32, 125.02, 123.19, 82.84, 72.19, 63.30.

**HRMS (ESI):** C<sub>21</sub>H<sub>16</sub>Cl<sub>2</sub>NaO<sub>2</sub>[M+ Na]<sup>+</sup>, Calculated = 393.0420, Found = 393.0419.

**2w.**

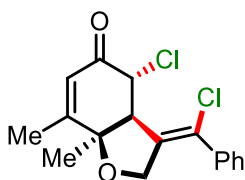

**(E)-4-chloro-3-(chloro(phenyl)methylene)-7,7a-dimethyl-2,3,3a,4-tetrahydrobenzofuran-5(7aH)-one**

47.91 mg, 75% yield, white solid.

**Melting point:** 145-147 °C.

**I.R. (CHCl<sub>3</sub>):**  $\nu$  3024, 2925, 2882, 1691, 1444, 1556, 1211, 1095, 668 cm<sup>-1</sup>.

**<sup>1</sup>H NMR (400 MHz, CDCl<sub>3</sub>):**  $\delta$  7.39 – 7.30 (m, 3H), 7.30 – 7.23 (m, 2H), 6.10 (d,  $J$  = 0.9 Hz, 1H), 5.14 – 5.11 (m, 1H), 4.08 (s,  $J$  = 12.0 Hz, 2H), 3.60 (s, 1H), 2.04 (s, 3H), 1.73 (s, 3H).

**<sup>13</sup>C NMR (100 MHz, CDCl<sub>3</sub>):**  $\delta$  190.22, 160.25, 137.34, 135.87, 129.59, 128.52, 128.00, 126.15, 81.72, 68.77, 56.98, 54.14, 24.75, 18.67.

**HRMS (ESI):** C<sub>17</sub>H<sub>16</sub>Cl<sub>2</sub>NaO<sub>2</sub>[M+ Na]<sup>+</sup>, Calculated = 345.0420, Found = 345.0418.

**2x.**

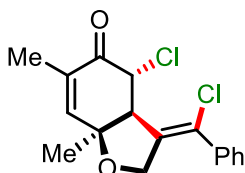

**(E)-4-chloro-3-(chloro(phenyl)methylene)-6,7a-dimethyl-2,3,3a,4-tetrahydrobenzofuran-5(7aH)-one**

46.80 mg, 46% yield, colorless liquid.

**I.R. (CHCl<sub>3</sub>):**  $\nu$  3029, 2936, 2878, 1697, 1449, 1558, 1216, 1090, 665 cm<sup>-1</sup>.

**<sup>1</sup>H NMR (500 MHz, CDCl<sub>3</sub>):**  $\delta$  7.37 – 7.34 (m, 3H), 7.29 – 7.25 (m, 2H), 6.32 (s, 1H), 5.07 (d,  $J$  = 2.9 Hz, 1H), 4.19 (dd,  $J$  = 12.8, 1.9 Hz, 1H), 4.12 (d,  $J$  = 12.8 Hz, 1H), 3.61 (s, 1H), 1.95 (d,  $J$  = 1.0 Hz, 3H), 1.70 (s, 3H).

**<sup>13</sup>C NMR (125 MHz, CDCl<sub>3</sub>):**  $\delta$  191.48, 144.65, 137.24, 136.25, 134.40, 129.57, 129.49, 128.51, 128.02, 79.74, 77.41, 77.16, 76.91, 68.35, 56.06, 54.69, 26.43, 16.17.

**HRMS (ESI):** C<sub>17</sub>H<sub>16</sub>Cl<sub>2</sub>NaO<sub>2</sub> [M+ Na]<sup>+</sup>, Calculated = 345.0420, Found = 345.0419.

**d) General Procedure for palladium catalyzed dibromination of alkyne-tethered cyclohexadienones:**

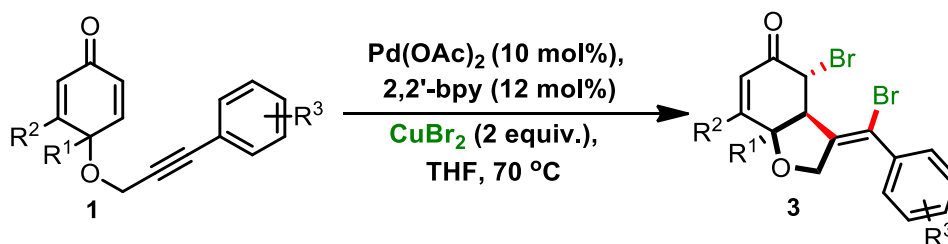

A dried reaction tube was charged with Pd(OAc)<sub>2</sub> (4.49 mg, 10 mol%), 2,2'-bpy (3.56 mg, 10 mol%), CuBr<sub>2</sub> (89.34 mg, 2equiv), and **1** (.2 mmol, 1 equiv) and anhydrous THF (2 mL, .2M) under nitrogen atmosphere. After that mixture was stirred at room temperature for 10 min, then reaction mixture was kept at 70 °C for 8-12 hour. After the completion of reaction as observed by TLC, solvent was evaporated under reduced pressure. The residue was purified by silica gel (100-200 mesh, hexane/ethylacetate) column chromatography to afford the desired product.

**3a.**

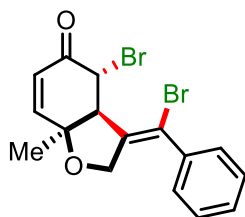

**(E)-4-bromo-3-(bromo(phenyl)methylene)-7a-methyl-2,3,3a,4-tetrahydrobenzofuran-5(7aH)-one**

69.39 mg, 89% yield, white solid.

**Melting Point:** 136-138 °C.

**I.R. (liquid):**  $\nu$  3014, 2996, 2874, 1692, 1476, 1567, 1216, 1087, 699 cm<sup>-1</sup>.

**<sup>1</sup>H NMR (400 MHz, CDCl<sub>3</sub>):**  $\delta$  7.38 – 7.30 (m, 3H), 7.30 – 7.18 (m, 2H), 6.48 (dd, J = 10.4, 1.2 Hz, 1H), 6.22 (dd, J = 10.4, 1.1 Hz, 1H), 5.18 (dd, J = 2.1, 1.2 Hz, 1H), 4.13 – 4.08 (m, 1H), 4.05 (d, J = 12.7 Hz, 1H), 3.56 (d, J = 1.6 Hz, 1H), 1.75 (s, 3H).

**<sup>13</sup>C NMR (100 MHz, CDCl<sub>3</sub>):**  $\delta$  190.63, 148.95, 139.69, 138.70, 129.47, 128.43, 128.33, 127.03, 120.95, 79.12, 68.56, 57.46, 43.41, 25.67.

**HRMS (ESI):** C<sub>16</sub>H<sub>14</sub>Br<sub>2</sub>NaO<sub>2</sub> [M+Na]<sup>+</sup>, Calculated = 418.9253, Found = 418.9256.

3b.

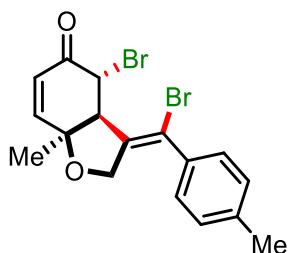

**(E)-4-bromo-3-(bromo(p-tolyl)methylene)-7a-methyl-2,3,3a,4-tetrahydrobenzofuran-5(7aH)-one**

72.11 mg, 84% yield, white solid.

**Melting point:** 138-140 °C.

**I.R. (Solid):**  $\nu$  3019, 2976, 2854, 1687, 1215, 1084, 1055, 669  $\text{cm}^{-1}$ .

**$^1\text{H}$  NMR (400 MHz,  $\text{CDCl}_3$ ):**  $\delta$  7.13 (s, 4H), 6.48 (dd,  $J = 10.4, 1.3$  Hz, 1H), 6.21 (dd,  $J = 10.4, 1.1$  Hz, 1H), 5.18 (dd,  $J = 2.1, 1.3$  Hz, 1H), 4.10 (dd,  $J = 12.7, 1.8$  Hz, 1H), 4.05 (d,  $J = 12.7$  Hz, 1H), 3.55 (d,  $J = 1.7$  Hz, 1H), 2.35 (s, 3H), 1.74 (s, 3H).

**$^{13}\text{C}$  NMR (100 MHz,  $\text{CDCl}_3$ ):**  $\delta$  190.82, 149.12, 139.83, 139.15, 136.05, 129.22, 128.39, 127.16, 121.39, 79.24, 68.75, 57.62, 43.66, 25.82, 21.40.

**HRMS (ESI):**  $\text{C}_{17}\text{H}_{16}\text{Br}_2\text{NaO}_2$   $[\text{M}+\text{Na}]^+$ , Calculated = 432.9409, Found = 432.9407.

*Crystal structure of this compound is reported (CCDC:1934494).*

3c.

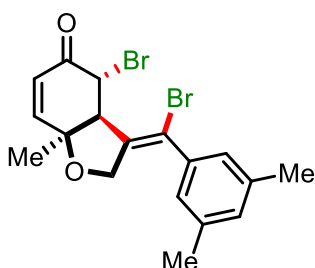

**(E)-4-bromo-3-(bromo(3,5-dimethylphenyl)methylene)-7a-methyl-2,3,3a,4-tetrahydrobenzofuran-5(7aH)-one**

74.46 mg, 86% yield, white semi-solid.

**I.R. ( $\text{CHCl}_3$ ):**  $\nu$  3022, 2965, 2935, 1689, 1456, 1556, 1215, 1113, 1058, 660  $\text{cm}^{-1}$ .

**<sup>1</sup>H NMR (400 MHz, CDCl<sub>3</sub>):** δ 6.95 (s, *J* = 0.6 Hz, 1H), 6.84 (s, 2H), 6.47 (dd, *J* = 10.4, 1.4 Hz, 1H), 6.22 (dd, *J* = 10.4, 1.3 Hz, 1H), 5.18 (dd, *J* = 2.3, 1.3 Hz, 1H), 4.06 (d, *J* = 2.2 Hz, 2H), 3.66 – 3.42 (m, 1H), 2.29 (d, *J* = 0.5 Hz, 6H), 1.74 (s, *J* = 32.0 Hz, 3H).

**<sup>13</sup>C NMR (100 MHz, CDCl<sub>3</sub>):** δ 190.79, 149.08, 139.24, 138.77, 138.18, 131.26, 127.10, 126.14, 121.40, 79.18, 68.70, 57.47, 43.65, 25.79, 21.28.

**HRMS (ESI):** C<sub>18</sub>H<sub>18</sub>O<sub>2</sub>Br<sub>2</sub>NaO<sub>2</sub>[M+Na]<sup>+</sup>, Calculated = 446.9566, Found = 446.9568.

**3d.**

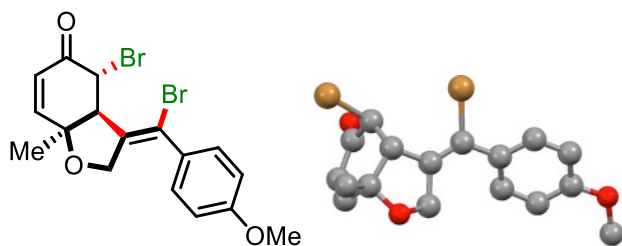

**(*E*)-4-bromo-3-(bromo(4-methoxyphenyl)methylene)-7a-methyl-2,3,3a,4-tetrahydrobenzofuran-5(7a*H*)-one**

68.88 mg, 82% yield, white solid.

**Melting Point:** 130-132 °C.

**I.R. (Solid):** ν 3016, 2975, 2984, 1697, 1498, 1538, 1216, 1089, 665 cm<sup>-1</sup>.

**<sup>1</sup>H NMR (400 MHz, CDCl<sub>3</sub>):** δ 7.21 – 7.13 (m, 2H), 6.87 – 6.81 (m, 2H), 6.48 (dd, *J* = 10.4, 1.4 Hz, 1H), 6.21 (dd, *J* = 10.4, 1.2 Hz, 1H), 5.17 (dd, *J* = 2.2, 1.3 Hz, 1H), 4.10 (dd, *J* = 12.6, 1.8 Hz, 1H), 4.05 (d, *J* = 12.6 Hz, 1H), 3.81 (s, 3H), 3.55 (dd, *J* = 3.5, 1.7 Hz, 1H), 1.74 (s, 3H).

**<sup>13</sup>C NMR (100 MHz, CDCl<sub>3</sub>):** δ 190.88, 160.47, 149.12, 138.52, 131.25, 130.54, 129.96, 127.14, 121.29, 94.60, 79.24, 68.76, 57.63, 55.52, 43.72, 25.80.

**HRMS (ESI):** C<sub>17</sub>H<sub>16</sub>Br<sub>2</sub>NaO<sub>3</sub> [M+Na]<sup>+</sup>, Calculated = 448.9358, Found = 448.9358. **Crystal structure of this compound is reported (CCDC: 1922346).**

**3e.**

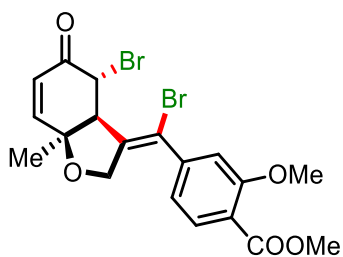

**Methyl 4-((*E*)-bromo-4-bromo-7a-methyl-5-oxo-4,5-dihydrobenzofuran-3(2*H*,3a*H*,7a*H*)ylidene)methyl)-2-methoxybenzoate**

79.92 mg, 83% yield, white solid.

**Melting Point:** 115-117 °C.

**I.R. (Solid):**  $\nu$ 3024, 2924, 1726, 1695, 1486, 1584, 1216, 1097, 1076, 699  $\text{cm}^{-1}$ .

**$^1\text{H}$  NMR (400 MHz,  $\text{CDCl}_3$ ):**  $\delta$  7.64 (d,  $J = 2.2$  Hz, 1H), 7.36 (dd,  $J = 8.7, 2.3$  Hz, 1H), 6.93 (d,  $J = 8.7$  Hz, 1H), 6.48 (d,  $J = 10.4$  Hz, 1H), 6.21 (d,  $J = 10.4$  Hz, 1H), 5.14 (s, 1H), 4.09 (d,  $J = 14.0$  Hz, 1H), 4.03 (d,  $J = 12.7$  Hz, 1H), 3.91 (s, 3H), 3.88 (s, 3H), 3.53 (s, 1H), 1.74 (s, 3H).

**$^{13}\text{C}$  NMR (100 MHz,  $\text{CDCl}_3$ ):**  $\delta$  190.70, 165.87, 159.73, 149.07, 139.72, 133.48, 131.76, 130.75, 127.19, 120.03, 119.76, 112.02, 79.26, 68.61, 57.62, 56.34, 52.41, 43.45, 25.78.

**HRMS (ESI):**  $\text{C}_{19}\text{H}_{18}\text{Br}_2\text{NaO}_5[\text{M} + \text{Na}]^+$ , Calculated = 506.9413, Found = 506.9413.

**3f.**

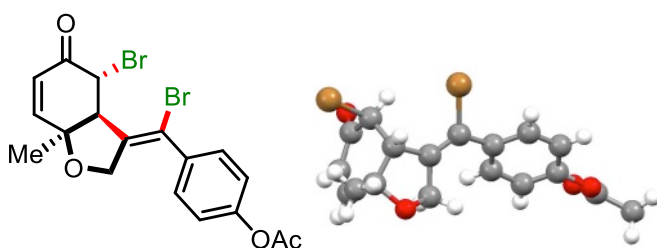

**4-((*E*)-bromo-4-bromo-7a-methyl-5-oxo-4,5-dihydrobenzofuran-3(2*H*,3a*H*,7a*H*)-ylidene)methyl)phenyl acetate**

73.8 mg, 82% yield, white solid.

**Melting Point:** 142-143 °C.

**I.R. (Solid):**  $\nu$ 3017, 2984, 2884, 1773, 1750, 1695, 1498, 1598, 1216, 1084, 664  $\text{cm}^{-1}$ .

**<sup>1</sup>H NMR (400 MHz, CDCl<sub>3</sub>):** δ 7.33 – 7.11 (m, 2H), 7.19 – 6.85 (m, 2H), 6.48 (dd, *J* = 10.4, 1.3 Hz, 1H), 6.21 (dd, *J* = 10.4, 1.2 Hz, 1H), 5.16 (dd, *J* = 2.2, 1.2 Hz, 1H), 4.08 (s, 2H), 3.57 (t, *J* = 14.2 Hz, 1H), 2.30 (s, 3H), 1.75 (s, 3H).

**<sup>13</sup>C NMR (100 MHz, CDCl<sub>3</sub>):** δ 190.69, 169.17, 151.37, 149.06, 140.24, 136.30, 129.68, 127.17, 121.75, 120.00, 79.26, 68.64, 57.63, 43.45, 29.83, 25.79, 21.25.

**HRMS (ESI):** C<sub>18</sub>H<sub>16</sub>Br<sub>2</sub>NaO<sub>4</sub> [M+ Na]<sup>+</sup>, Calculated = 476.9308, Found = 476.9307.

*Crystal structure of this compound is reported (CCDC: 1913346).*

**3g.**

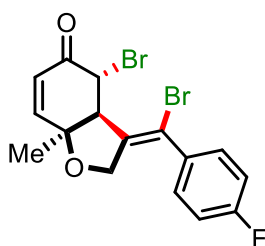

**(E)-4-bromo-3-(bromo(4-fluorophenyl)methylene)-7a-methyl-2,3,3a,4-tetrahydrobenzofuran-5(7aH)-one**

66.22 mg, 80% yield, colorless semi-solid.

**I.R. (Solid):** ν 3016, 2915, 2875, 1698, 1478, 1567, 1216, 1091, 1076, 662 cm<sup>-1</sup>.

**<sup>1</sup>H NMR (400 MHz, CDCl<sub>3</sub>):** δ 7.27 – 7.18 (m, 2H), 7.06 – 6.98 (m, 2H), 6.48 (dd, *J* = 10.4, 1.3 Hz, 1H), 6.21 (dd, *J* = 10.4, 1.1 Hz, 1H), 5.15 (dd, *J* = 2.1, 1.2 Hz, 1H), 4.08 (dd, *J* = 12.7, 1.8 Hz, 1H), 4.02 (d, *J* = 12.7 Hz, 1H), 3.54 (d, *J* = 1.6 Hz, 1H), 1.75 (s, 3H).

**<sup>13</sup>C NMR (100 MHz, CDCl<sub>3</sub>):** δ 190.53, 164.25, 161.76, 148.86, 140.00, 134.85, 130.34, 130.26, 127.07, 119.66, 115.66, 115.44, 79.21, 68.47, 57.46, 43.29, 25.67.

**HRMS (ESI):** C<sub>16</sub>H<sub>13</sub>Br<sub>2</sub>FKO<sub>2</sub> [M+K]<sup>+</sup>, Calculated = 452.8898, found = 452.8894.

**3h.**

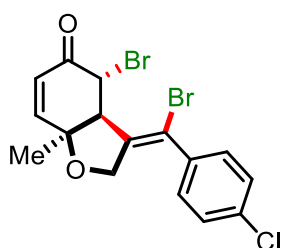



**(E)-4-chloro-3-(chloro(4-chlorophenyl)methylene)-7a-methyl-2,3,3a,4-tetrahydrobenzofuran-5(7aH)-one**

69.88 mg, 80% yield, white solid

**Melting point:** 128-130 °C.

**I.R. (Solid):**  $\nu$  3018, 2925, 2882, 1696, 1455, 1555, 1217, 1076, 1093, 665  $\text{cm}^{-1}$ .

**$^1\text{H}$  NMR (500 MHz,  $\text{CDCl}_3$ ):**  $\delta$  7.31 (d,  $J = 8.5$  Hz, 2H), 7.18 (d,  $J = 8.5$  Hz, 2H), 6.48 (d,  $J = 10.4$  Hz, 1H), 6.21 (d,  $J = 10.4$  Hz, 1H), 5.14 (s, 1H), 4.08 (dd,  $J = 12.8, 1.7$  Hz, 1H), 4.03 (d,  $J = 12.8$  Hz, 1H), 3.54 (d,  $J = 1.3$  Hz, 1H), 1.75 (s, 3H).

**$^{13}\text{C}$  NMR (125 MHz,  $\text{CDCl}_3$ ):**  $\delta$  190.63, 148.99, 140.61, 137.27, 135.66, 131.53, 129.79, 128.86, 127.23, 119.65, 79.34, 68.60, 57.65, 43.34, 25.81.

**HRMS (ESI):**  $\text{C}_{16}\text{H}_{13}\text{Br}_2\text{ClNaO}_2[\text{M} + \text{Na}]^+$ , Calculated = 452.8863, Found = 452.8865.

**3i.**

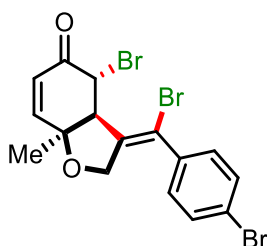

**(E)-4-bromo-3-(bromo(4-bromophenyl)methylene)-7a-methyl-2,3,3a,4-tetrahydrobenzofuran-5(7aH)-one**

76.46 mg, 81% yield, white solid

**Melting Point:** 161-171 °C.

**I.R. (Solid):**  $\nu$  3013, 2927, 2886, 1694, 1217, 1087, 1067, 669  $\text{cm}^{-1}$

**$^1\text{H}$  NMR (500 MHz,  $\text{CDCl}_3$ ):**  $\delta$  7.47 (d,  $J = 8.5$  Hz, 2H), 7.11 (d,  $J = 8.5$  Hz, 2H), 6.48 (dd,  $J = 10.4, 1.2$  Hz, 1H), 6.21 (dd,  $J = 10.4, 1.0$  Hz, 1H), 5.13 (dd,  $J = 2.0, 1.2$  Hz, 1H), 4.08 (dd,  $J = 12.8, 1.8$  Hz, 1H), 4.03 (d,  $J = 12.8$  Hz, 1H), 3.53 (d,  $J = 1.4$  Hz, 1H), 1.74 (s, 3H)..

**$^{13}\text{C}$  NMR (125 MHz,  $\text{CDCl}_3$ ):**  $\delta$  190.59, 148.97, 140.63, 137.70, 131.80, 129.99, 127.21, 123.88, 119.65, 79.31, 68.56, 57.63, 43.28, 25.78.

**HRMS (ESI):**  $\text{C}_{16}\text{H}_{13}\text{Br}_3\text{KO}_2 [\text{M} + \text{K}]^+$ , Calculated = 512.8097, found = 512.8092.

3j.

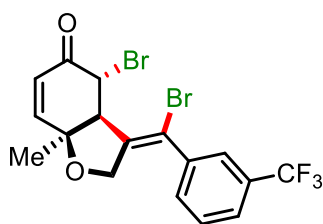

**(E)-4-bromo-3-(bromo(3-(trifluoromethyl)phenyl)methylene)-7a-methyl-2,3,3a,4-tetrahydrobenzofuran-5(7aH)-one**

59 mg, 65% yield, colorless liquid.

**I.R. (CHCl<sub>3</sub>):**  $\nu$ 3034, 2955, 2858, 1694, 1464, 1543, 1216, 1085, 668 cm<sup>-1</sup>.

**<sup>1</sup>H NMR (500 MHz, CDCl<sub>3</sub>):**  $\delta$  7.60 (d,  $J$  = 7.7 Hz, 1H), 7.49 (dd,  $J$  = 15.3, 7.4 Hz, 2H), 7.41 (d,  $J$  = 7.6 Hz, 1H), 6.49 (d,  $J$  = 10.4 Hz, 1H), 6.23 (d,  $J$  = 10.4 Hz, 1H), 5.15 (d,  $J$  = 1.0 Hz, 1H), 4.10 (d,  $J$  = 12.8 Hz, 1H), 4.02 (d,  $J$  = 12.7 Hz, 1H), 3.57 (s, 1H), 1.76 (s,  $J$  = 11.2 Hz, 3H).

**<sup>13</sup>C NMR (125 MHz, CDCl<sub>3</sub>):**  $\delta$  190.53, 148.95, 141.71, 139.61, 131.71, 129.27, 128.32, 127.31, 126.34, 125.30, 79.40, 68.48, 57.70, 43.19, 25.82

**HRMS (ESI):** C<sub>17</sub>H<sub>13</sub>Br<sub>2</sub>F<sub>3</sub>NaO<sub>2</sub>[M+ Na]<sup>+</sup>, Calculated = 486.9127, Found = 486.9123.

3k.

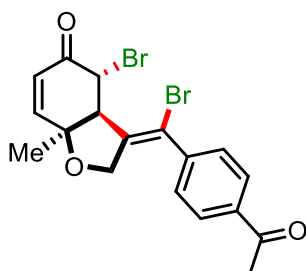

**(E)-3-((4-acetylphenyl)bromomethylene)-4-bromo-7a-methyl-2,3,3a,4-tetrahydrobenzofuran-5(7aH)-one.**

63.99 mg, 81% yield, white solid.

**I.R. (Solid):**  $\nu$  3014, 2975, 2984, 1705, 1685, 1485, 1565, 1216, 1089, 1065, 665, cm<sup>-1</sup>.

**<sup>1</sup>H NMR (400 MHz, CDCl<sub>3</sub>):**  $\delta$  7.91 (d,  $J$  = 8.5 Hz, 2H), 7.34 (d,  $J$  = 8.5 Hz, 2H), 6.49 (dd,  $J$  = 10.4, 1.3 Hz, 1H), 6.22 (dd,  $J$  = 10.4, 1.2 Hz, 1H), 5.15 (dd,  $J$  = 2.2, 1.2 Hz, 1H), 4.11 (dd,

$J = 12.9, 2.0$  Hz, 1H), 4.03 (d,  $J = 12.8$  Hz, 1H), 3.57 (dd,  $J = 3.5, 2.0$  Hz, 1H), 2.60 (s,  $J = 3.8$  Hz, 3H), 1.75 (s, 3H).

$^{13}\text{C}$  NMR (100 MHz,  $\text{CDCl}_3$ ):  $\delta$  197.23, 190.55, 148.96, 143.01, 141.63, 137.64, 128.78, 128.53, 127.26, 119.53, 79.31, 68.58, 57.72, 43.22, 26.81, 25.79.

HRMS (ESI):  $\text{C}_{18}\text{H}_{17}\text{Br}_2\text{O}_3$   $[\text{M}+\text{H}]^+$ , Calculated = 438.9539, Found = 438.9539.

### 3l.

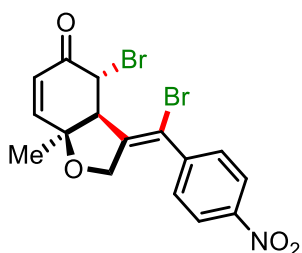

### (*E*)-4-bromo-3-(bromo(4-nitrophenyl)methylene)-7a-methyl-2,3,3a,4-tetrahydrobenzofuran-5(7aH)-one

46.98 mg, 54% yield, white solid.

Melting point: 118-119 °C.

I.R. (Solid):  $\nu$  2952, 2926, 1690, 1520, 1346, 1498, 1520, 1216, 1095, 839, 668  $\text{cm}^{-1}$

$^1\text{H}$  NMR (400 MHz,  $\text{CDCl}_3$ ):  $\delta$  8.24 – 8.18 (m, 2H), 7.46 – 7.41 (m, 2H), 6.50 (dd,  $J = 10.5, 1.3$  Hz, 1H), 6.24 (dd,  $J = 10.4, 1.2$  Hz, 1H), 5.13 (dd,  $J = 2.2, 1.2$  Hz, 1H), 4.12 (dd,  $J = 12.9, 2.0$  Hz, 1H), 4.04 (d,  $J = 12.9$  Hz, 1H), 3.74 – 3.26 (m, 1H), 1.77 (s, 3H).

$^{13}\text{C}$  NMR (100 MHz,  $\text{CDCl}_3$ ):  $\delta$  189.33, 149.66, 144.41, 142.86, 129.49, 127.13, 124.61, 81.89, 72.66, 54.80, 42.36, 25.61.

HRMS (ESI):  $\text{C}_{16}\text{H}_{13}\text{Br}_2\text{NNaO}_4$   $[\text{M}+\text{Na}]^+$ , Calculated = 463.9104, Found = 463.9104.

### 3m.

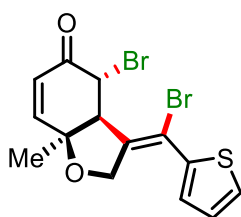

**(E)-4-bromo-3-(bromo(thiophen-2-yl)methylene)-7a-methyl-2,3,3a,4-tetrahydrobenzofuran-5(7aH)-one**

53.72 mg, 68% yield, white solid.

**Melting Point:** 142-144°C.

**I.R. (Solid):**  $\nu$  3024, 2945, 2848, 1684, 1454, 1533, 1216, 1095, 665  $\text{cm}^{-1}$ .

**$^1\text{H}$  NMR (500 MHz,  $\text{CDCl}_3$ ):**  $\delta$  7.45 (dd,  $J = 5.1, 0.8$  Hz, 1H), 7.20 (d,  $J = 3.1$  Hz, 1H), 7.05 (ddd,  $J = 14.2, 7.2, 4.6$  Hz, 1H), 6.51 (dd,  $J = 10.5, 1.3$  Hz, 1H), 6.09 (dd,  $J = 10.4, 0.8$  Hz, 1H), 4.55 (d,  $J = 14.6$  Hz, 1H), 4.18 (d,  $J = 1.2$  Hz, 1H), 4.10 (dd,  $J = 14.6, 2.6$  Hz, 1H), 3.72 (s,  $J = 12.8$  Hz, 1H), 1.75 (s, 3H).

**$^{13}\text{C}$  NMR (125 MHz,  $\text{CDCl}_3$ ):**  $\delta$  189.86, 149.85, 141.31, 139.53, 129.46, 128.45, 127.71, 127.06, 109.98, 81.48, 72.54, 55.11, 42.23, 25.72.

**HRMS (ESI):**  $\text{C}_{14}\text{H}_{12}\text{Br}_2\text{NaO}_2\text{S}$  [ $\text{M}^+ \text{Na}^+$ ] $^+$ , Calculated = 424.8817, Found = 424.8819.

**3n.**

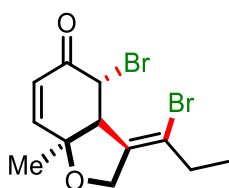

**(E)-4-bromo-3-(1-bromopropylidene)-7a-methyl-2,3,3a,4-tetrahydrobenzofuran-5(7aH)-one**

47.9 mg, 69% yield, yellow liquid.

**I.R. (Solid):**  $\nu$  3025, 2975, 2974, 1696, 1437, 1554, 1215, 1090, 1073, 665  $\text{cm}^{-1}$ .

**$^1\text{H}$  NMR (400 MHz,  $\text{CDCl}_3$ ):**  $\delta$  6.43 (dd,  $J = 10.4, 1.1$  Hz, 1H), 6.13 (dd,  $J = 10.4, 0.9$  Hz, 1H), 5.14 (d,  $J = 1.0$  Hz, 1H), 4.35 (d,  $J = 12.2$  Hz, 1H), 3.91 (d,  $J = 12.3$  Hz, 1H), 3.35 (s,  $J = 21.4$  Hz, 1H), 2.38 – 2.32 (m, 2H), 1.69 (d,  $J = 15.6$  Hz, 3H), 1.09 (t,  $J = 7.4$  Hz, 3H).

**$^{13}\text{C}$  NMR (100 MHz,  $\text{CDCl}_3$ ):**  $\delta$  190.82, 149.14, 136.31, 126.94, 125.99, 79.45, 67.36, 56.48, 43.83, 32.98, 25.84, 13.02.

**HRMS (ESI):**  $\text{C}_{12}\text{H}_{14}\text{Br}_2\text{NaO}_2$  [ $\text{M}^+ \text{Na}^+$ ], Calculated = 370.9253, found = 370.9258.

30.

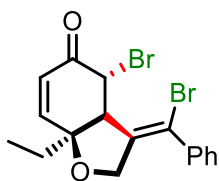

**(E)-4-bromo-3-(bromo(phenyl)methylene)-7a-ethyl-2,3,3a,4-tetrahydrobenzofuran-5(7aH)-one**

60.35 mg, 71% yield, white semi-solid.

**I.R. (CHCl<sub>3</sub>):**  $\nu$  3054, 2955, 2868, 1684, 1474, 1573, 1215, 1096, 666 cm<sup>-1</sup>.

**<sup>1</sup>H NMR (400 MHz, CDCl<sub>3</sub>):**  $\delta$  7.39 – 7.32 (m, 3H), 7.30 – 7.24 (m, 2H), 6.63 (dd,  $J$  = 10.5, 1.2 Hz, 1H), 6.24 (dd,  $J$  = 10.5, 1.0 Hz, 1H), 5.04 (dd,  $J$  = 3.2, 1.0 Hz, 1H), 4.25 (dd,  $J$  = 12.9, 2.1 Hz, 1H), 4.14 (d,  $J$  = 12.9 Hz, 1H), 3.73 – 3.67 (m, 1H), 2.12 – 1.94 (m, 2H), 1.08 (t,  $J$  = 7.5 Hz, 3H).

**<sup>13</sup>CNMR (100 MHz, CDCl<sub>3</sub>):**  $\delta$  190.91, 149.82, 138.21, 135.06, 128.56, 129.54, 128.03, 127.61, 82.65, 67.47, 53.48, 52.20, 30.31, 8.1.

**HRMS (ESI):** C<sub>17</sub>H<sub>17</sub>Br<sub>2</sub>O<sub>2</sub> [M+H]<sup>+</sup>, Calculated = 410.9590, Found = 410.9592.

3p.

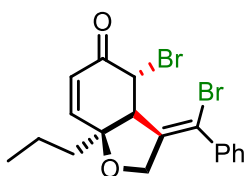

**(E)-4-bromo-3-(bromo(phenyl)methylene)-7a-propyl-2,3,3a,4-tetrahydrobenzofuran-5(7aH)-one**

52.129 mg, 70% yield, white solid.

**Melting Point:** 141-143 °C.

**I.R. (Solid):**  $\nu$  3018, 2975, 2988, 1699, 1434, 1553, 1216, 1083, 1073, 668 cm<sup>-1</sup>.

**<sup>1</sup>H NMR (400 MHz, CDCl<sub>3</sub>):**  $\delta$  7.37 – 7.30 (m, 3H), 7.28 – 7.20 (m, 2H), 6.57 (dd,  $J$  = 10.5, 1.2 Hz, 1H), 6.23 (dd,  $J$  = 10.5, 1.1 Hz, 1H), 5.17 (dd,  $J$  = 2.2, 1.2 Hz, 1H), 4.10 (dd,  $J$  =

12.8, 1.8 Hz, 1H), 4.05 (d,  $J = 12.7$  Hz, 1H), 3.65 (d,  $J = 1.5$  Hz, 1H), 2.11 – 1.92 (m, 2H), 1.66 – 1.51 (m, 2H), 1.00 (t,  $J = 7.3$  Hz, 3H).

$^{13}\text{C}$  NMR (100 MHz,  $\text{CDCl}_3$ ):  $\delta$  191.01, 148.51, 140.02, 138.83, 129.56, 128.54, 128.48, 127.34, 120.91, 81.34, 68.57, 55.37, 43.75, 40.45, 16.57, 14.58.

HRMS (ESI):  $\text{C}_{18}\text{H}_{19}\text{Br}_2\text{NaO}_2$   $[\text{M}+\text{Na}]^+$ , Calculated = 446.9566, Found = 446.9566.

3q.

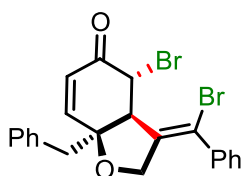

**(E)-7a-benzyl-4-bromo-3-(bromo(phenyl)methylene)-2,3,3a,4-tetrahydrobenzofuran-5(7aH)-one**

61.41 mg, 65% yield, white semi-solid.

I.R. ( $\text{CHCl}_3$ ):  $\nu$  3013, 2972, 2982, 1695, 1432, 1552, 1216, 1085, 1073, 665  $\text{cm}^{-1}$ .

$^1\text{H}$  NMR (400 MHz,  $\text{CDCl}_3$ ):  $\delta$  7.42 – 7.27 (m, 8H), 7.25 – 7.14 (m, 2H), 6.43 (dd,  $J = 10.5$ , 1.1 Hz, 1H), 6.23 (dd,  $J = 10.5$ , 1.0 Hz, 1H), 5.21 (s,  $J = 1.1$  Hz, 1H), 4.07 (s, 2H), 3.63 (s, 1H), 3.47 (d,  $J = 14.2$  Hz, 1H), 3.29 (d,  $J = 14.2$  Hz, 1H).

$^{13}\text{C}$  NMR (100 MHz,  $\text{CDCl}_3$ ):  $\delta$  190.95, 147.61, 139.60, 138.76, 135.21, 131.19, 129.57, 128.51, 128.47, 128.40, 127.38, 127.24, 120.96, 81.07, 68.53, 55.23, 44.28, 43.92.

HRMS (ESI):  $\text{C}_{22}\text{H}_{18}\text{Br}_2\text{NaO}_2$   $[\text{M}+\text{Na}]^+$ , Calculated = 494.9566, Found = 494.9561.

3r.

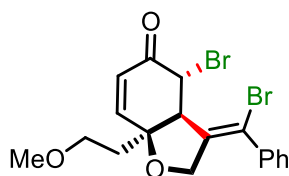

**(E)-4-bromo-3-(bromo(phenyl)methylene)-7a-(2-methoxyethyl)-2,3,3a,4-tetrahydrobenzofuran-5(7aH)-one**

53.07 mg, 61% yield, white liquid.

I.R. ( $\text{CHCl}_3$ ):  $\nu$  3023, 2995, 2938, 1694, 1474, 1563, 1216, 1063, 1053, 665  $\text{cm}^{-1}$ .

**<sup>1</sup>H NMR (400 MHz, CDCl<sub>3</sub>):** δ 7.36 – 7.30 (m, 3H), 7.28 – 7.17 (m, 2H), 6.64 (dd, *J* = 10.5, 1.3 Hz, 1H), 6.23 (dd, *J* = 10.5, 1.2 Hz, 1H), 5.16 (dd, *J* = 2.4, 1.2 Hz, 1H), 4.12 (dd, *J* = 12.8, 1.8 Hz, 1H), 4.07 (d, *J* = 12.7 Hz, 1H), 3.77 (dd, *J* = 3.5, 1.7 Hz, 1H), 3.71 – 3.62 (m, 2H), 3.36 (s, 3H), 2.47 – 2.37 (m, 1H), 2.33 – 2.24 (m, 1H)..

**<sup>13</sup>C NMR (100 MHz, CDCl<sub>3</sub>):** δ 190.83, 148.15, 139.66, 138.80, 129.59, 128.54, 128.47, 127.18, 120.97, 80.36, 68.61, 67.67, 58.76, 56.30, 43.65, 38.18.

**HRMS (ESI):** C<sub>18</sub>H<sub>18</sub>Br<sub>2</sub>KO<sub>3</sub>[M+ K]<sup>+</sup>, Calculated = 478.9254, Found = 478.9256.

**3s.**

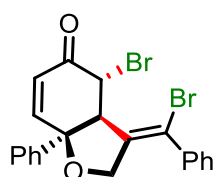

**(E)-4-bromo-3-(bromo(phenyl)methylene)-7a-phenyl-2,3,3a,4-tetrahydrobenzofuran-5(7aH)-one**

45.91 mg, 51% yield, white semi-solid.

**I.R. (CHCl<sub>3</sub>):** ν 3034, 2985, 2848, 1694, 1454, 1533, 1214, 1094, 664 cm<sup>-1</sup>.

**<sup>1</sup>H NMR (500 MHz, CDCl<sub>3</sub>):** δ 7.58 (d, *J* = 7.2 Hz, 2H), 7.46 – 7.34 (m, 6H), 7.31 – 7.27 (m, 2H), 6.79 (d, *J* = 10.4 Hz, 1H), 6.50 (d, *J* = 10.4 Hz, 1H), 5.16 (d, *J* = 2.2 Hz, 1H), 4.34 (s, 2H), 3.91 (d, *J* = 1.8 Hz, 1H).

**<sup>13</sup>C NMR (125 MHz, CDCl<sub>3</sub>):** δ 190.52, 146.75, 141.13, 139.38, 138.60, 129.57, 128.71, 128.63, 128.56, 128.49, 128.43, 126.29, 120.84, 82.20, 77.30, 77.04, 76.79, 68.96, 59.55, 43.85, 22.64.

**HRMS (ESI):** C<sub>21</sub>H<sub>16</sub>Br<sub>2</sub>NaO<sub>2</sub> [M+Na]<sup>+</sup>, Calculated = 480.9409, Found = 480.9403.

**3t.**

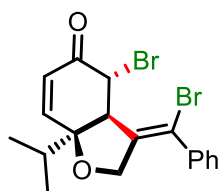

52 mg mixture of **3t** and starting material **1s**.

Mole ratio of **3t** and **1s** = (1.15:1). **3t** was found in 36 % yield.

**3v.**

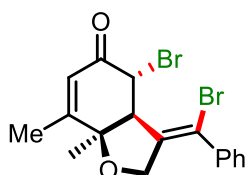

**(E)-4-bromo-3-(bromo(phenyl)methylene)-7,7a-dimethyl-2,3,3a,4-tetrahydrobenzofuran-5(7aH)-one**

56.44 mg, 69% yield, white solid

**Melting Point:** 126-128 °C.

**I.R. (Solid):**  $\nu$  3016, 2975, 2984, 1698, 1435, 1556, 1214, 1089, 1073, 665,  $\text{cm}^{-1}$ .

**$^1\text{H}$  NMR (400 MHz,  $\text{CDCl}_3$ ):**  $\delta$  7.35 – 7.28 (m, 3H), 7.26 – 7.19 (m, 2H), 6.12 – 6.11 (m, 1H), 5.26 (dd,  $J = 2.1, 1.2$  Hz, 1H), 3.99 (d,  $J = 2.4$  Hz, 2H), 3.54 (s, 1H), 2.04 (d,  $J = 1.2$  Hz, 3H), 1.76 (s, 3H).

**$^{13}\text{C}$  NMR (100 MHz,  $\text{CDCl}_3$ ):**  $\delta$  190.37 (s), 159.78 (s), 139.42 (d,  $J = 83.1$  Hz), 128.21 (dd,  $J = 169.9, 164.0$  Hz), 120.83 (s), 81.66 (s), 69.01 (s), 58.69 (s), 43.77 (s), 24.54 (s), 18.68 (s).

**HRMS (ESI):**  $\text{C}_{17}\text{H}_{16}\text{Br}_2\text{NaO}_2[\text{M}+\text{Na}]^+$ , Calculated = 432.9409, found = 432.9408.

**3w.**

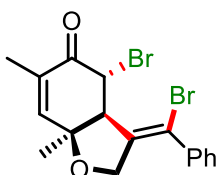

**(E)-4-bromo-3-(bromo(phenyl)methylene)-6,7a-dimethyl-2,3,3a,4-tetrahydrobenzofuran-5(7aH)-one**

31 mg, 38% yield, colorless liquid

**$^1\text{H}$  NMR (500 MHz,  $\text{CDCl}_3$ ):**  $\delta$  7.39 – 7.32 (m, 3H), 7.31 – 7.21 (m, 2H), 6.27 (s, 1H), 5.21 (d,  $J = 2.2$  Hz, 1H), 4.09 (dd,  $J = 12.7, 1.6$  Hz, 1H), 4.05 (d,  $J = 12.7$  Hz, 1H), 3.59 (d,  $J = 26.9$  Hz, 1H), 1.98 (s, 3H), 1.74 (s, 3H).



$^{13}\text{C}$  NMR (125 MHz,  $\text{CDCl}_3$ ):  $\delta$  191.52, 144.26, 140.24, 138.87, 134.35, 129.53, 128.52, 128.49, 120.83, 79.63, 77.41, 77.16, 76.91, 68.46, 57.76, 44.25, 26.21, 16.29.

HRMS (ESI):  $\text{C}_{17}\text{H}_{16}\text{Br}_2\text{NaO}_2[\text{M}+\text{Na}]^+$ , Calculated = 432.9409, found = 432.9407.

### 3) Procedure for gram scale synthesis:

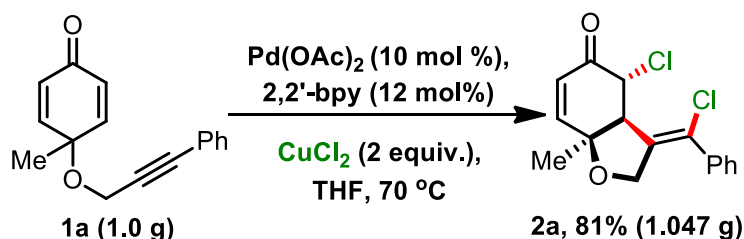

A dried reaction tube was charged with  $\text{Pd}(\text{OAc})_2$  (94.21 mg, 10 mol%), 2,2'-bpy (65.6 mg, 10 mol%),  $\text{CuCl}_2 \cdot 2\text{H}_2\text{O}$  (1.4 g, 2 equiv.), and **1a** (1 g, 4.13 mmol) and anhydrous THF (20 mL, .2M) under nitrogen atmosphere. After that mixture was stirred at room temperature for 10 min, reaction mixture was kept at 70 °C for 8-12 hour. After the completion of reaction as observed by TLC, solvent was evaporated under reduced pressure. The residue was purified by silica gel (100-200 mesh, hexane/ethylacetate) column chromatography to afford the desired product **2a** (1.047 g, 81% yield).

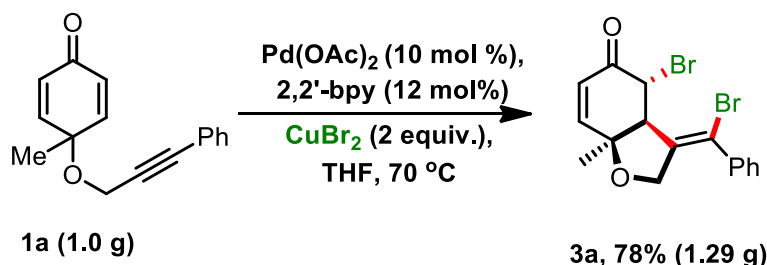

A dried reaction tube was charged with  $\text{Pd}(\text{OAc})_2$  (94.21 mg, 10 mol%), 2,2'-bpy (65.6 mg, 10 mol%),  $\text{CuBr}_2$  (1.84 g, 2 equiv.) and **1a** (1 g, 4.13 mmol) and anhydrous THF (20 L, .2M) under nitrogen atmosphere. After that mixture was stirred at room temperature for 10 min, reaction mixture was kept at 70 °C for 8-12 hour. After the completion of reaction as observed by TLC, solvent was evaporated under reduced pressure. The residue was purified by silica gel (100-200 mesh, hexane/ethylacetate) column chromatography to afford the desired product **3a** (1.29 g, 78% yield).

### 5. Functionalization:

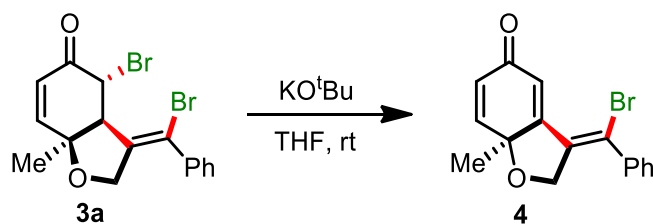

To a solution of **3a** (100 mg, 0.25 mmol) in dry THF (5 mL) was added KO<sup>t</sup>Bu (28 mg, 1 equiv.) at room temperature. After 2 h, solvent was removed in vacuo and the resulting mixture was extracted with diethyl ether. The combined organic layer was washed with brine and dried over anhydrous sodium sulfate. Evaporation of the solvent followed by purification by flash chromatography (PE/EA = 85/15) on silica gel to give product **4** (67.86 mg, 85% yield).

**4.**

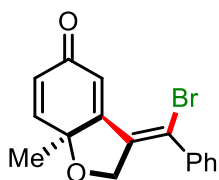

**(E)-3-(bromo(phenyl)methylene)-7a-methyl-2,3-dihydrobenzofuran-5(7aH)-one**

33.93 mg, 85% yield, colorless liquid.

**I.R.**(CHCl<sub>3</sub>):  $\nu$  3021, 2955, 2944, 1697, 1455, 1576, 1215, 1086, 1063 cm<sup>-1</sup>.

**<sup>1</sup>H NMR** (400 MHz, CDCl<sub>3</sub>):  $\delta$  7.45 – 7.33 (m, 5H), 7.21 (d, *J* = 1.1 Hz, 1H), 7.13 (d, *J* = 9.9 Hz, 1H), 6.19 (dd, *J* = 9.9, 1.4 Hz, 1H), 4.54 (dd, *J* = 34.6, 13.5 Hz, 2H), 1.47 (s, 3H).

**<sup>13</sup>C NMR** (100 MHz, CDCl<sub>3</sub>):  $\delta$  186.80, 160.51, 148.21, 140.21, 134.16, 129.78, 128.91, 127.90, 127.82, 121.32, 80.73, 70.81, 26.66.

**HRMS (ESI)**: C<sub>16</sub>H<sub>13</sub>BrNaO<sub>2</sub>[M+Na]<sup>+</sup>, Calculated = 338.9991, found = 338.9996.

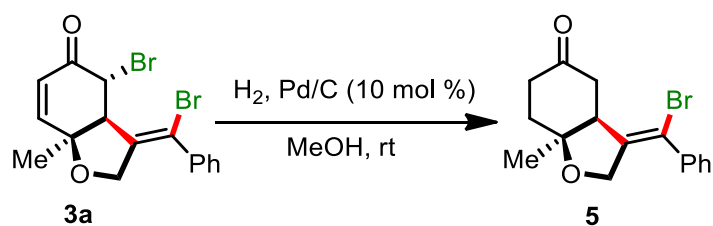

To a solution of **3a** (100 mg, 0.25 mmol) in MeOH (5 mL) was added Pd/C (10 wt.%, 50 mg, 0.0267 mmol) and H<sub>2</sub> gas was bubbled from a balloon at room temperature. After 2 h, mixture was filtered through a pad of celite and washed with EtOAc (10 mL) and diethyl ether (10 mL). The combined organic phase was dried with Na<sub>2</sub>SO<sub>4</sub>. After removal of the solvent under reduced pressure, the residue was purified by column chromatography (silica gel mesh 100-200; hexane: ethyl acetate; 80:20) to give the product **5** (71.13 mg, 91% yield).

**5.**

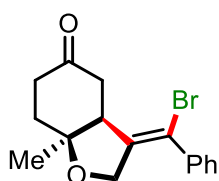

**(E)-4-bromo-3-(bromo(phenyl)methylene)-7a-methyl-2,3,3a,4-tetrahydrobenzofuran-5(7aH)-one**

78.08 mg, 91% yield, colorless liquid.

**I.R. (CHCl<sub>3</sub>):**  $\nu$  3015, 2965, 2974, 1710, 1455, 1576, 1216, 1089, 1073 cm<sup>-1</sup>.

**<sup>1</sup>H NMR (500 MHz, CDCl<sub>3</sub>):**  $\delta$  7.40 – 7.30 (m, 5H), 4.52 (d, J = 14.1 Hz, 1H), 4.34 (d, J = 14.1 Hz, 1H), 3.23 (t, J = 7.6 Hz, 1H), 2.86 (dd, J = 15.0, 7.4 Hz, 1H), 2.63 – 2.51 (m, 2H), 2.24 (ddt, J = 20.3, 10.2, 5.2 Hz, 2H), 2.17 – 2.10 (m, 1H), 1.34 (s, 3H).

**<sup>13</sup>C NMR (126 MHz, CDCl<sub>3</sub>):**  $\delta$  211.42, 144.44, 139.28, 128.88, 128.60, 128.26, 114.64, 81.04, 68.52, 52.54, 40.29, 35.69, 33.46, 25.69.

**HRMS (ESI):** C<sub>16</sub>H<sub>17</sub>BrNaO<sub>2</sub> [M+Na]<sup>+</sup>, Calculated = 343.0304, found = 343.0307.

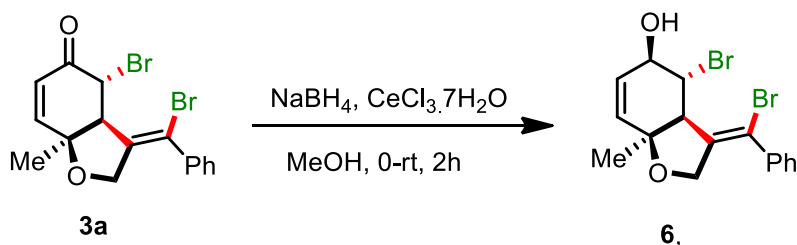

To a solution of **3a** (100 mg, 0.25 mmol) in MeOH (5 mL) was added CeCl<sub>3</sub>·7H<sub>2</sub>O (9.4 mg, 10 mol%) and NaBH<sub>4</sub> (9.5 mg, 1 equiv) at 0 °C temperature. After that, reaction mixture was allowed to run at room temperature for 2 h. After that, reaction mixture was filtered through

a pad of celite and washed with EtOAc (10 mL) and diethyl ether (10 mL). The combined organic phase was dried with Na<sub>2</sub>SO<sub>4</sub>. After removal of the solvent under reduced pressure, the residue was purified by column chromatography (silica gel mesh 100-200; PE/EA = 70:30) to give the product **6** (92.46 mg, 92% yield).

6.

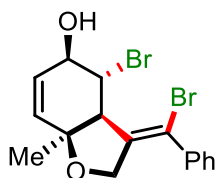

**(E)-4-bromo-3-(bromo(phenyl)methylene)-7a-methyl-2,3,3a,4,5,7a-hexahydrobenzofuran-5-ol**

46.23 mg, 92% yield, semi solid.

**I.R. (CHCl<sub>3</sub>):**  $\nu$  3347, 3021, 2959, 2843, 1485, 1586, 1215, 1096, 1063, 699 cm<sup>-1</sup>.

**<sup>1</sup>H NMR (400 MHz, CDCl<sub>3</sub>):**  $\delta$  7.38 – 7.23 (m, 5H), 5.83 (d, J = 10.3 Hz, 1H), 5.58 (dd, J = 10.2, 1.5 Hz, 1H), 5.39 (s, 1H), 4.29 (s, 1H), 4.20 (dd, J = 12.6, 1.5 Hz, 1H), 4.04 (t, J = 16.7 Hz, 1H), 3.52 (d, J = 3.5 Hz, 1H), 1.59 (s, 3H).

**<sup>13</sup>C NMR (100 MHz, CDCl<sub>3</sub>):**  $\delta$  141.24 (s), 139.08 (s), 131.58 (s), 131.09 (s), 129.33 (s), 128.52 (s), 128.43 (s), 119.07 (s), 80.12 (s), 68.55 (s), 65.74 (s), 58.24 (s), 56.31 (s), 27.55 (s).

**HRMS (ESI):** C<sub>16</sub>H<sub>16</sub>Br<sub>2</sub>NaO<sub>2</sub>[M+Na]<sup>+</sup>, Calculated = 420.9409, found = 420.9407.

7.

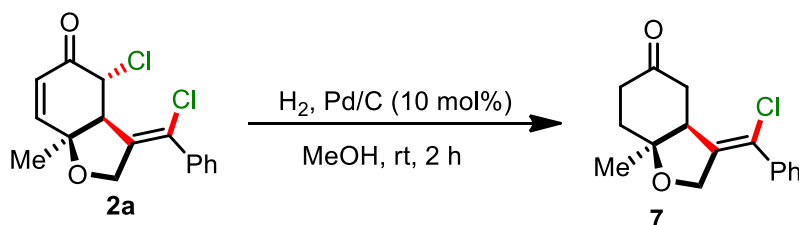

To a solution of **2a** (100 mg, 0.327 mmol) in MeOH (5 mL) was added Pd/C (10 wt.%, 50 mg, 0.0035 mmol) and H<sub>2</sub> gas was bubbled from a balloon at room temperature. After 2 h, the reaction mixture was filtered through a pad of celite and washed with EtOAc (10 mL) and diethyl ether (10 mL). The combined organic phase was dried over Na<sub>2</sub>SO<sub>4</sub>. After removal of

thesolvent under reduced pressure, the residue was purified by column chromatography (silica gel,mesh100-200; hexane: ethyl acetate; 80:20) to give the product 7(94.50 mg, 91%yield).

7.

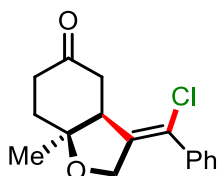

**(E)-3-(chloro(phenyl)methylene)-7a-methylhexahydrobenzofuran-5(6H)-one**

81.4 mg, 91% yield, colorless liquid.

**I.R. (CHCl<sub>3</sub>):**  $\nu$  3029, 2979, 2883, 1698, 1485, 1586, 1215, 1076, 1083cm<sup>-1</sup>.

**<sup>1</sup>H NMR (400 MHz, CDCl<sub>3</sub>):**  $\delta$  7.46 – 7.29 (m, 5H), 4.67 – 4.56 (m, 1H), 4.41 (d, J = 14.1 Hz, 1H), 3.35 – 3.02 (m, 1H), 2.82 (dd, J = 15.0, 7.4 Hz, 1H), 2.66 – 2.39 (m, 2H), 2.33 – 2.05 (m, 3H), 1.31 (s, 3H).

**<sup>13</sup>C NMR (100 MHz, CDCl<sub>3</sub>):**  $\delta$  211.55 (s), 141.32 (s), 137.63 (s), 128.92 (s), 128.58 (s), 127.87 (s), 124.46 (s), 81.19 (s), 68.46 (s), 50.37 (s), 40.41 (s), 35.67 (s), 33.39 (s), 25.76 (s).

**HRMS (ESI):** C<sub>16</sub>H<sub>17</sub>ClNaO<sub>2</sub> [M+Na]<sup>+</sup>, Calculated = 299.0809, found = 299.0811.

**6. Mechanistic study:**

9.

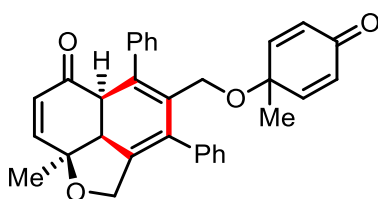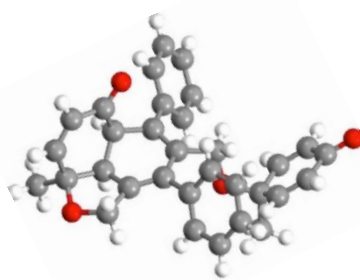

**(8a-methyl-4-(((1-methyl-4-oxocyclohexa-2,5-dien-1-yl)oxy)methyl)-3,5-diphenyl-5a,8a-dihydro-2H-naphtho[1,8-bc]furan-6(2a1H)-one**

36.9 mg, 40% yield, white solid.

**I.R. (Solid):**  $\nu$ 3016, 2975, 2984, 1698, 1694, 1556, 1435, 1216, 1120, 1089, 1073 cm<sup>-1</sup>.

**<sup>1</sup>H NMR (400 MHz, CDCl<sub>3</sub>):** δ 7.54 – 7.46 (m, 2H), 7.41 – 7.27 (m, 6H), 7.13 (s, 2H), 6.59 – 6.48 (m, 1H), 6.37 (dd, J = 10.2, 3.1 Hz, 1H), 6.17 – 6.04 (m, 1H), 6.04 – 5.90 (m, 1H), 5.88 – 5.67 (m, 1H), 5.46 – 5.10 (m, 1H), 4.90 – 4.62 (m, 1H), 3.97 (dd, J = 15.4, 3.1 Hz, 1H), 3.83 (d, J = 9.9 Hz, 1H), 3.63 (d, J = 9.9 Hz, 1H), 3.51 – 3.41 (m, 1H), 3.34 (t, J = 7.6 Hz, 1H), 1.59 (s, 3H), 1.22 (s, 3H).

**<sup>13</sup>C NMR (100 MHz, CDCl<sub>3</sub>):** δ 199.32 (s), 185.11 (s), 151.64 (s), 151.35 (s), 150.08 (s), 141.17 (s), 140.62 (s), 138.27 (s), 137.87 (s), 132.20 (s), 132.11 (s), 130.72 (s), 129.85 (s), 129.76 (s), 128.95 (s), 128.82 (s), 128.35 (s), 128.33 (s), 127.73 (s), 127.51 (s), 79.83 (s), 72.27 (s), 67.94 (s), 62.40 (s), 49.66 (s), 49.22 (s), 26.41 (s), 24.46 (s).

**HRMS (ESI):** C<sub>32</sub>H<sub>28</sub>NaO<sub>4</sub>[M+Na]<sup>+</sup>, Calculated = 499.1880, found = 499.1881.

**Crystal structure of this compound is reported (CCDC: 1922338).**

(e) A dried reaction tube was charged with compound **7** (55.35 mg, 0.2 mmol), CuCl<sub>2</sub> (26 mg, 1 equiv.) and anhydrous THF (2 mL) under nitrogen atmosphere. After that, mixture was stirred at room temperature for 10 min. After 10 minute, when TLC was observed, no new product formation was observed. Thereafter, the reaction temperature was increased to 60 °C and reaction was monitored after 1 and 2 hours by TLC. Starting material was found to be unreacted as per the NMR analysis. This experiment excludes the possibility of any alpha chlorination of **7**, failing to provide any of the chlorinated products **12** or **13** with CuCl<sub>2</sub> acting as the Cl<sub>2</sub> source.

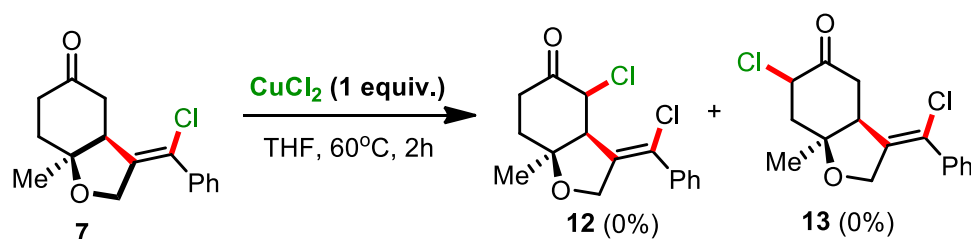

(f) A dried reaction tube was charged with Pd(OAc)<sub>2</sub> (2.23 mg, 10 mol%), compound **1a** (23.8 mg, 0.1 mmol), CuCl<sub>2</sub> (26.8 mg, 2 equiv.), 2,2,6,6-tetramethylpiperidyl-1-oxyl (TEMPO) (15.6 mg, 1 equiv.) and anhydrous THF (1 mL) under nitrogen atmosphere and reaction mixture was stirred at 60 °C for 2 h. Thereafter, NMR of crude reaction mixture was studied, suggesting the absence of radical intermediated since formation of **2a** was observed in 88% yield.

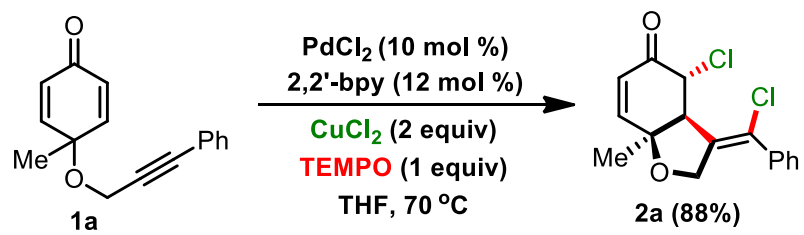

CMRV-RS-774-1H  
CMRV-RS-774-1H

7.36  
7.35  
7.34  
7.34  
7.34  
7.27  
7.26  
7.25  
7.25  
6.56  
6.55  
6.53  
6.53  
6.22  
6.20  
6.20  
5.06  
5.05  
5.05  
4.24  
4.23  
4.20  
4.14  
4.11  
3.62  
1.72

(E)-3-((4-acetylphenyl)chloromethylene)-4-chloro-7a-methyl-2,3,3a,4-tetrahydrobenzofuran-5(7aH)-one

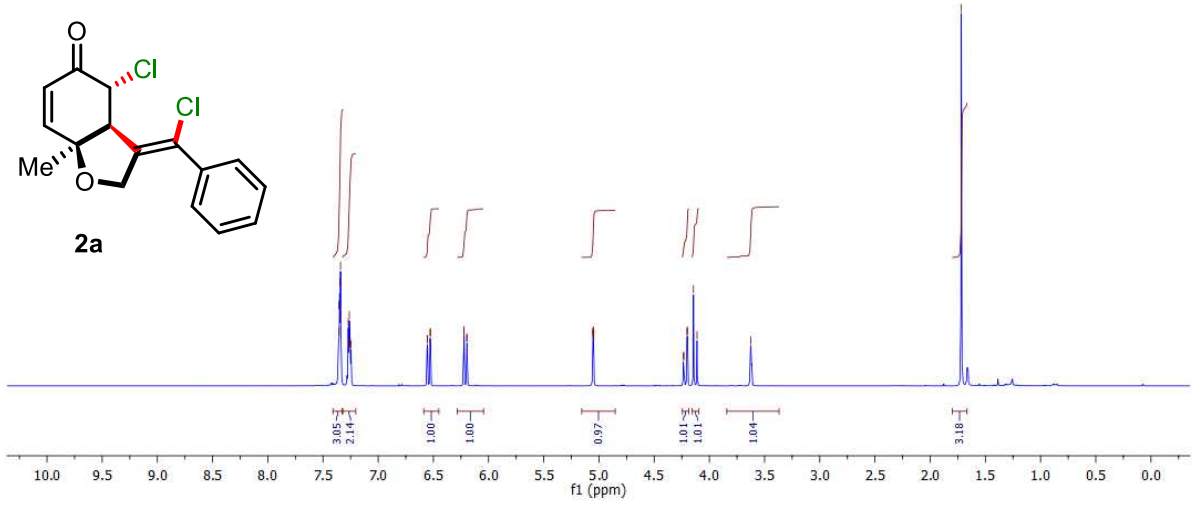

CMRV-RS-774-13C  
CMRV-RS-774-13C

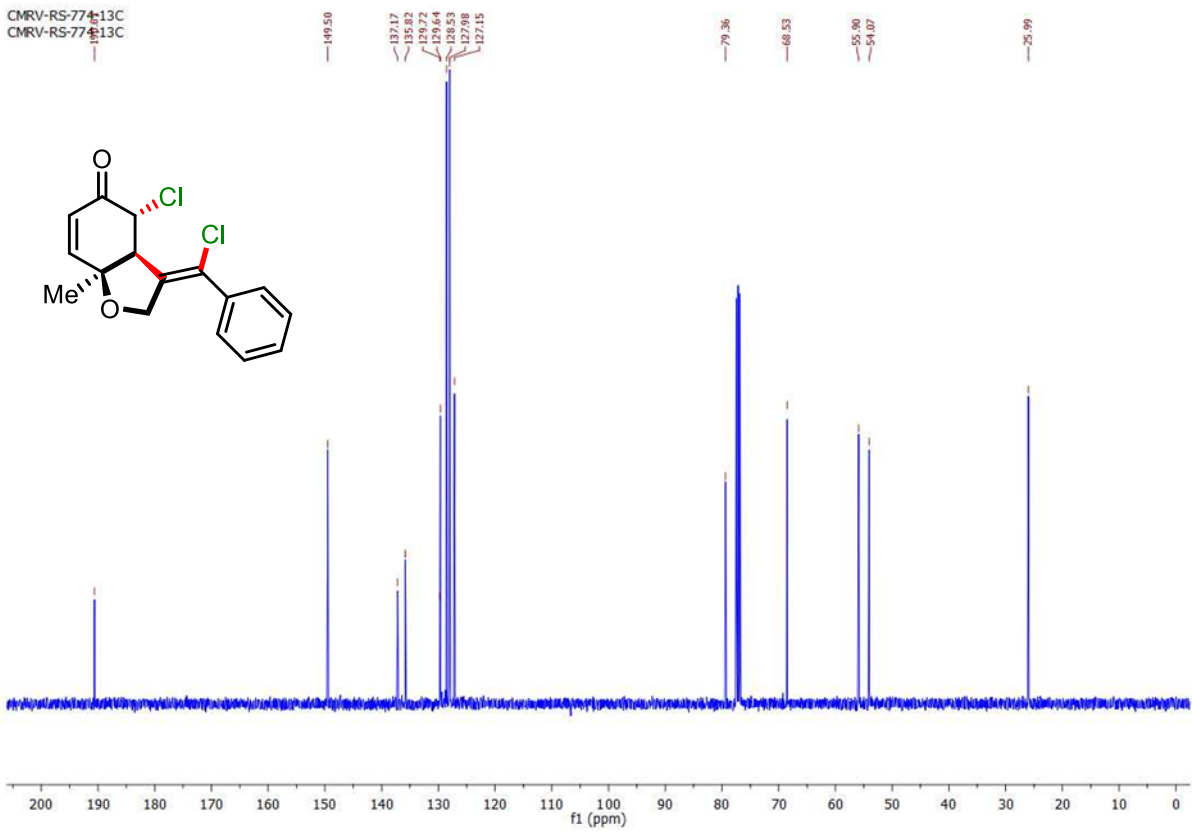



AS-251-B-1H  
AS-251-B-1H

7.15 6.55 6.52 6.22 6.19 5.04 4.22 4.19 4.14 4.11 3.61 2.35 1.72

(E)-4-chloro-3-(chloro(p-tolyl)methylene)-7a-methyl-2,3,3a,4-tetrahydrobenzofuran-5(7aH)-one

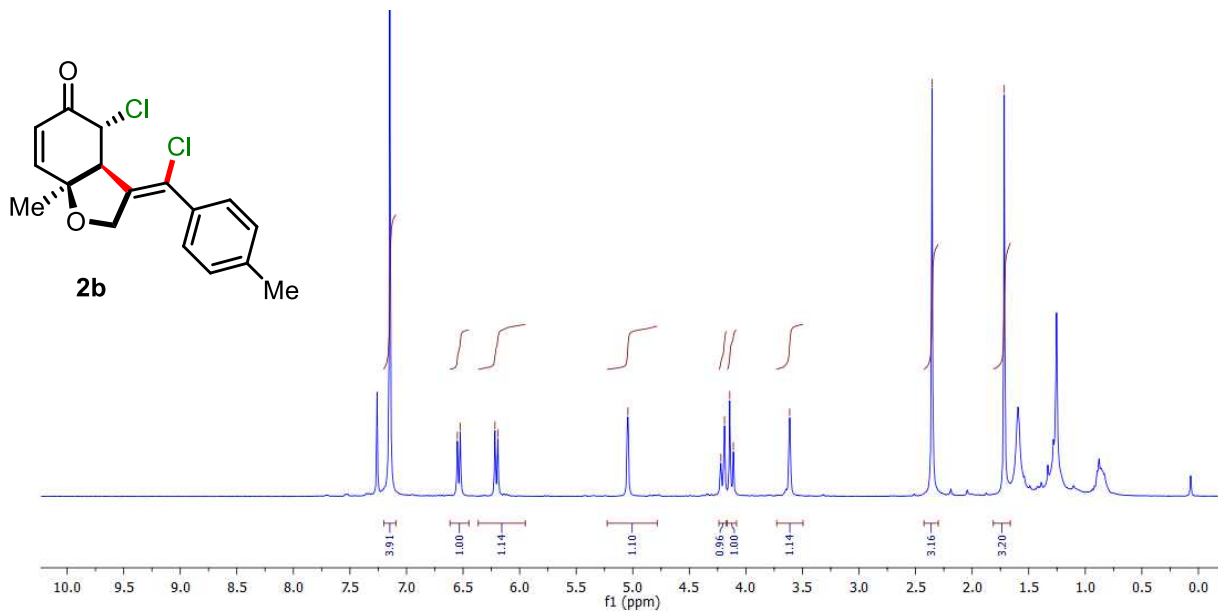

AS-251-B-13C  
AS-251-B-13C

149.57 139.87 135.88 134.41 133.97 133.93 127.93 127.18 76.30 77.46 76.84 68.62 55.92 54.12 26.03 21.42

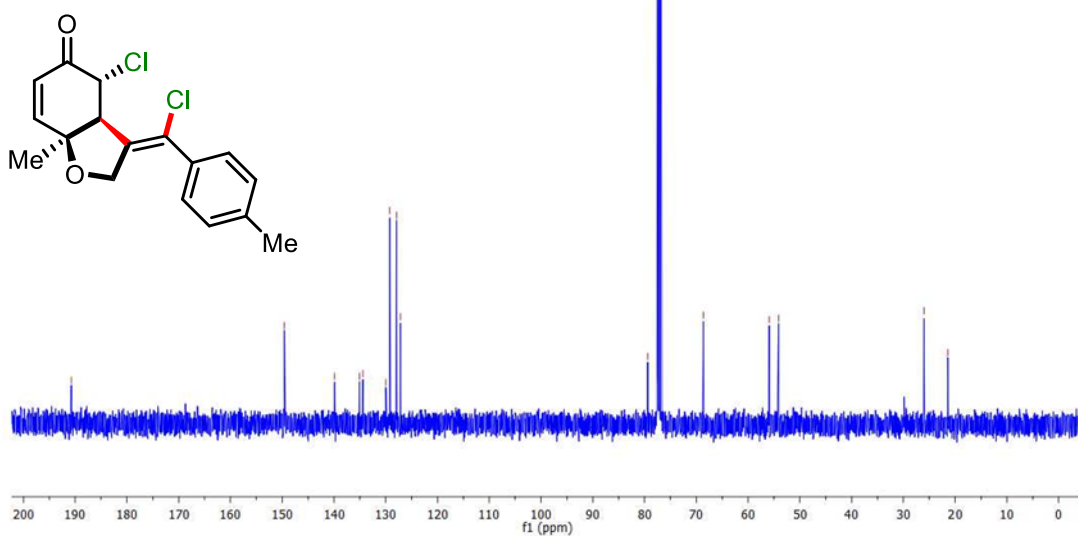

CMRV-RS-699-1H  
CMRV-RS-699-1H

6.98  
6.98  
6.88  
6.55  
6.53  
6.32  
6.22  
6.20  
6.20  
5.05  
5.05  
5.04  
5.04  
4.20  
4.19  
4.17  
4.17  
4.11  
3.61  
3.60  
3.60  
2.30  
2.30  
1.71

(E)-4-chloro-3-(chloro(3,5-dimethylphenyl)methylene)-7a-methyl-  
2,3,3a,4-tetrahydrobenzofuran-5(7aH)-one

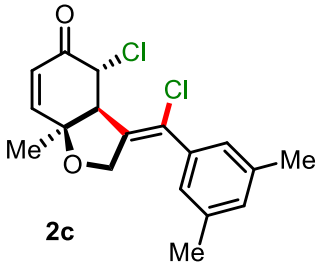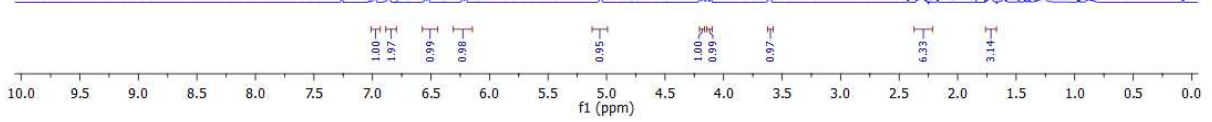

CMRV-RS-699-13C  
CMRV-RS-699-13C

149.55  
138.20  
137.18  
135.27  
131.32  
130.06  
127.16  
125.76  
79.35  
68.59  
55.83  
51.14  
26.03  
21.33

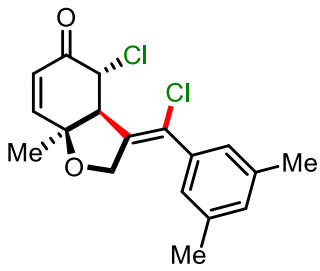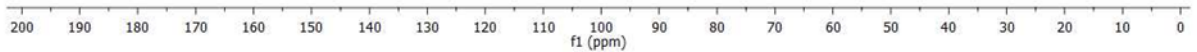

CMRV-AS-249-1H  
CMRV-AS-249-1H

7.726  
7.720  
7.720  
7.719  
7.718  
6.887  
6.884  
6.552  
6.522  
6.514  
6.514  
6.199  
6.199  
5.004  
5.004  
5.003  
5.003  
4.119  
4.118  
4.114  
4.111  
3.862  
3.861  
3.861  
1.72

(E)-4-chloro-3-(chloro(4-methoxyphenyl)methylene)-7a-methyl-  
2,3,3a,4-tetrahydrobenzofuran-5(7aH)-one

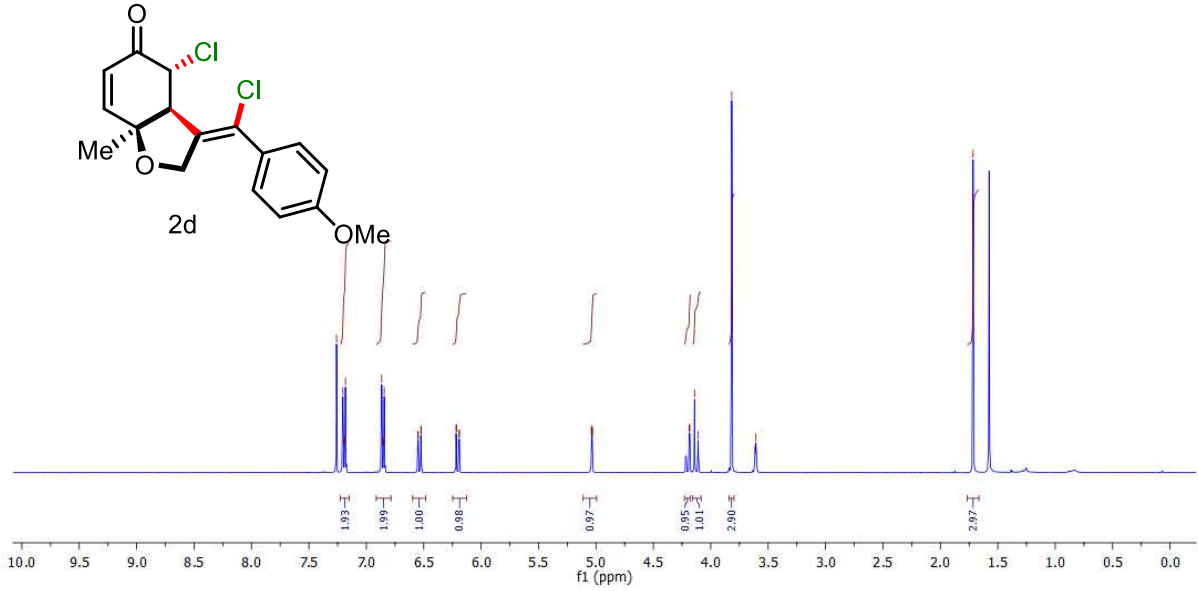

CMRV-AS-249-RE-13C  
CMRV-AS-249-RE-13C

160.53  
149.54  
134.37  
129.75  
129.63  
129.48  
127.15  
113.86  
79.38  
77.48  
77.16  
76.84  
68.62  
55.04  
55.00  
54.16  
26.02

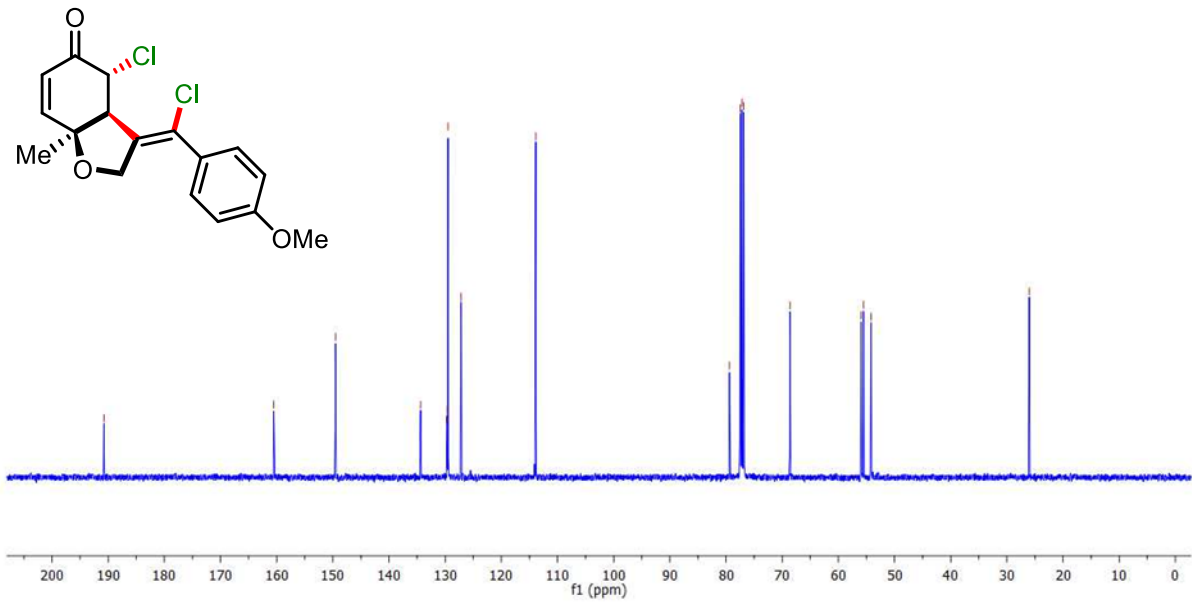

CMRV-AS-209-A-1H  
CMRV-AS-209-A-1H

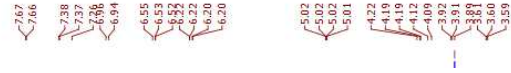

(Z)-methyl 4-(chloro(7-chloro-3a-methyl-6-oxo-2,3,3a,6,7,7a-hexahydro-1H-inden-1-ylidene)methyl)-2-methoxybenzoate

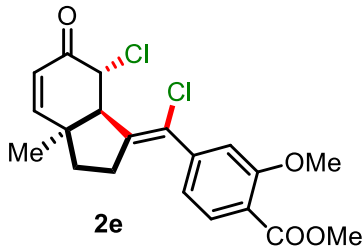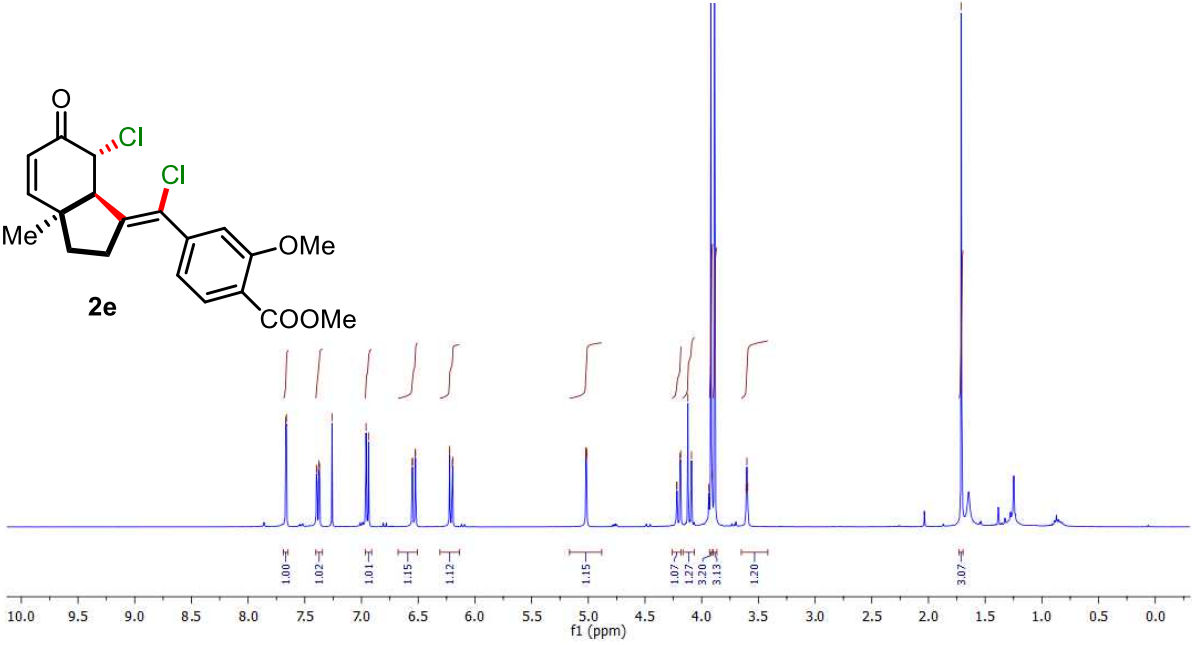

CMRV-AS-209-B-13C  
CMRV-AS-209-B-13C

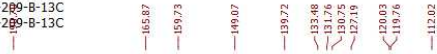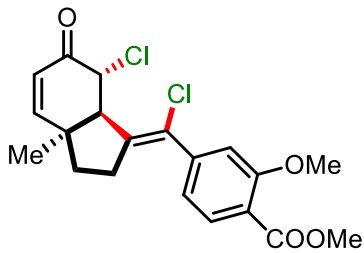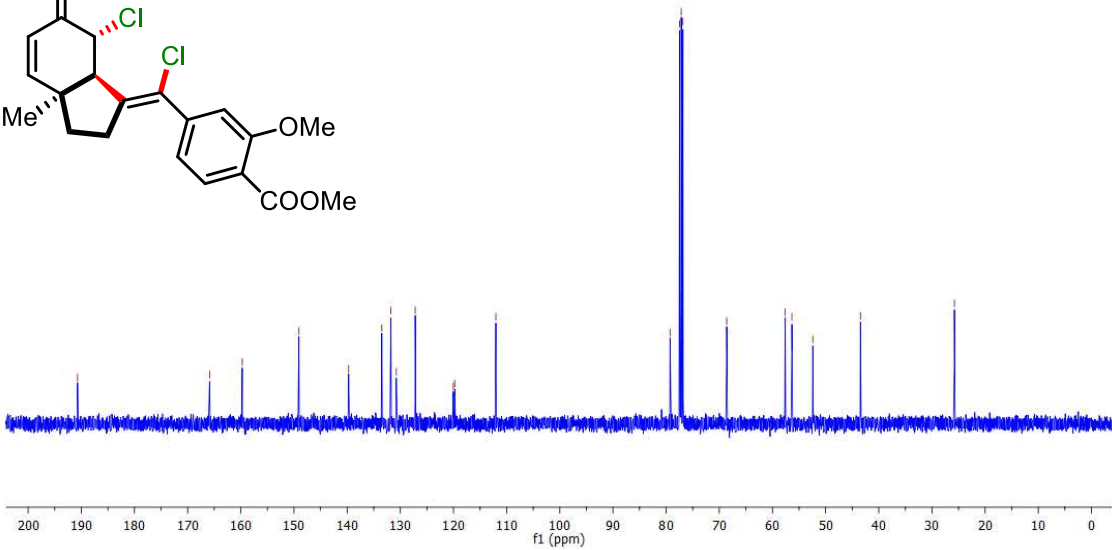

CMRV-AS-210A-1H of cristal  
CMRV-AS-210A-1H

7.739  
7.729  
7.728  
7.727  
7.726  
7.711  
7.710  
7.709  
7.708  
6.656  
6.655  
6.654  
6.633  
6.622  
6.620  
6.619  
5.093  
5.093  
5.092  
5.092  
4.422  
4.419  
4.419  
4.417  
4.414  
3.622  
3.622  
3.621  
3.621

(E)-chloro((3aS,4R,7aS)-4-chloro-7a-methyl-5-oxo-4,5-dihydrobenzofuran-3(2H,3aH,7aH)-ylidene)methyl)cyclohexa-1,3-dien-1-yl acetate

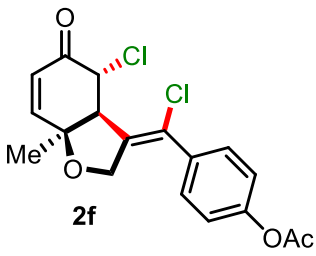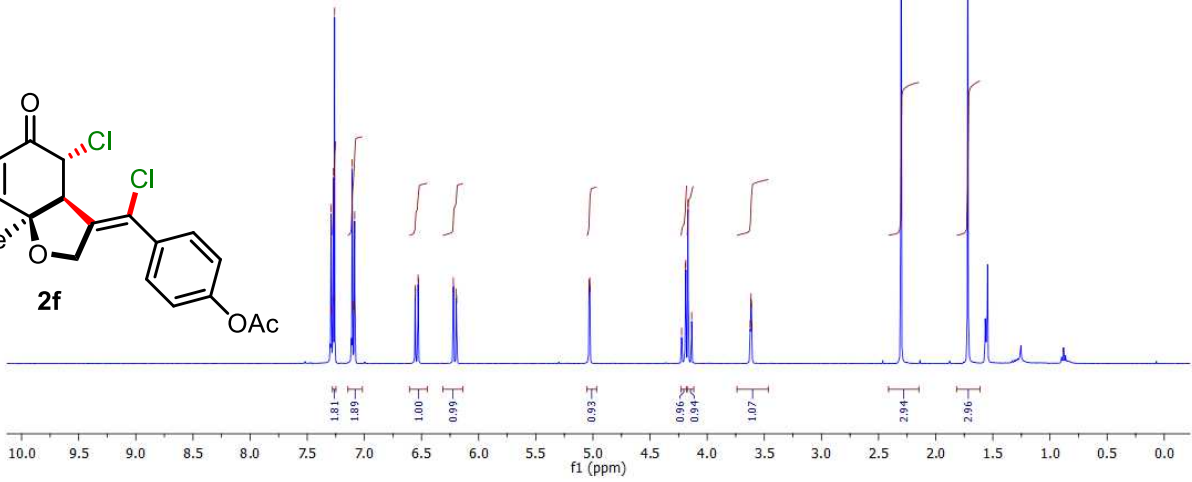

CMRV-AS-210A-13C  
CMRV-AS-210A-13C

169.18  
151.43  
149.48  
136.19  
134.68  
129.23  
128.81  
127.19  
121.77  
79.40  
68.49  
55.06  
54.04  
29.82  
29.79  
21.25

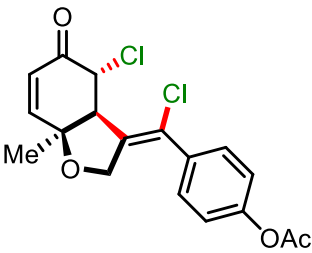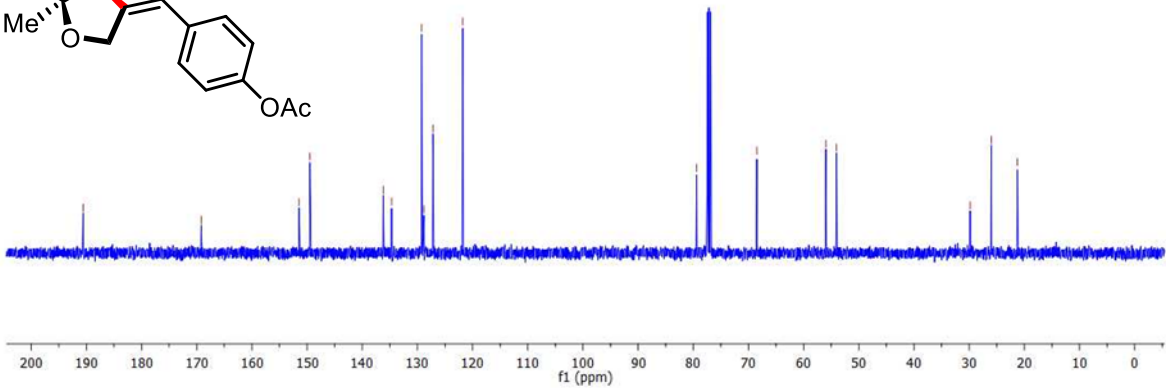

CMRV-AS-533-RE-1H  
CMRV-AS-533-RE-1H

7.27  
7.26  
7.25  
7.23  
7.06  
7.04  
6.55  
6.52  
6.32  
6.19  
5.03  
5.02  
4.17  
4.17  
4.14  
4.08  
3.60

(E)-4-chloro-3-(chloro(4-fluorophenyl)methylene)-7a-methyl-  
2,3,3a,4-tetrahydrobenzofuran-5(7aH)-one

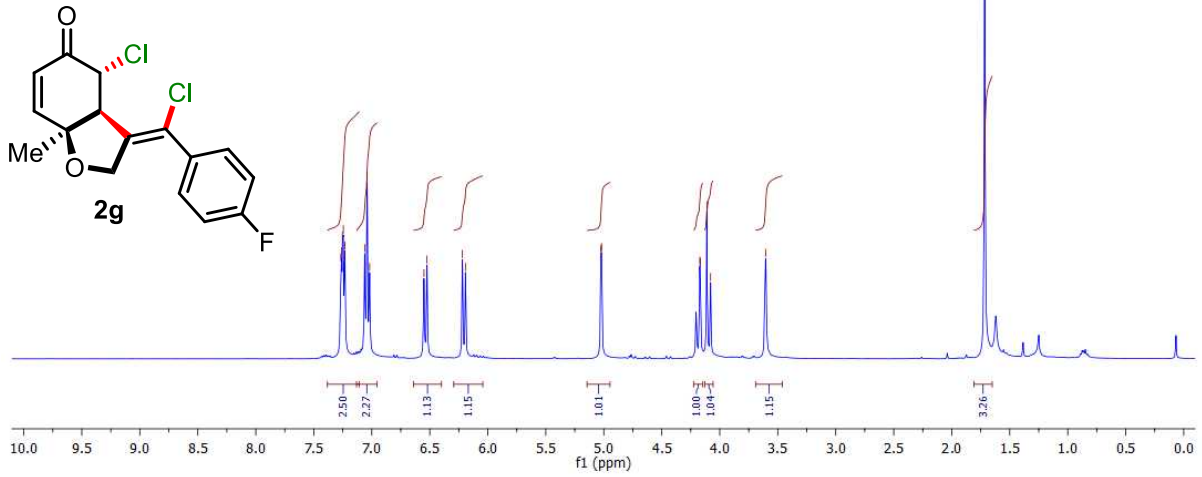

CMRV-AS-533-RE-13C  
CMRV-AS-533-RE-13C

164.32  
161.83  
149.30  
135.91  
133.21  
129.92  
129.84  
128.53  
127.09  
115.67  
115.46  
79.35  
68.34  
55.79  
53.88  
25.87

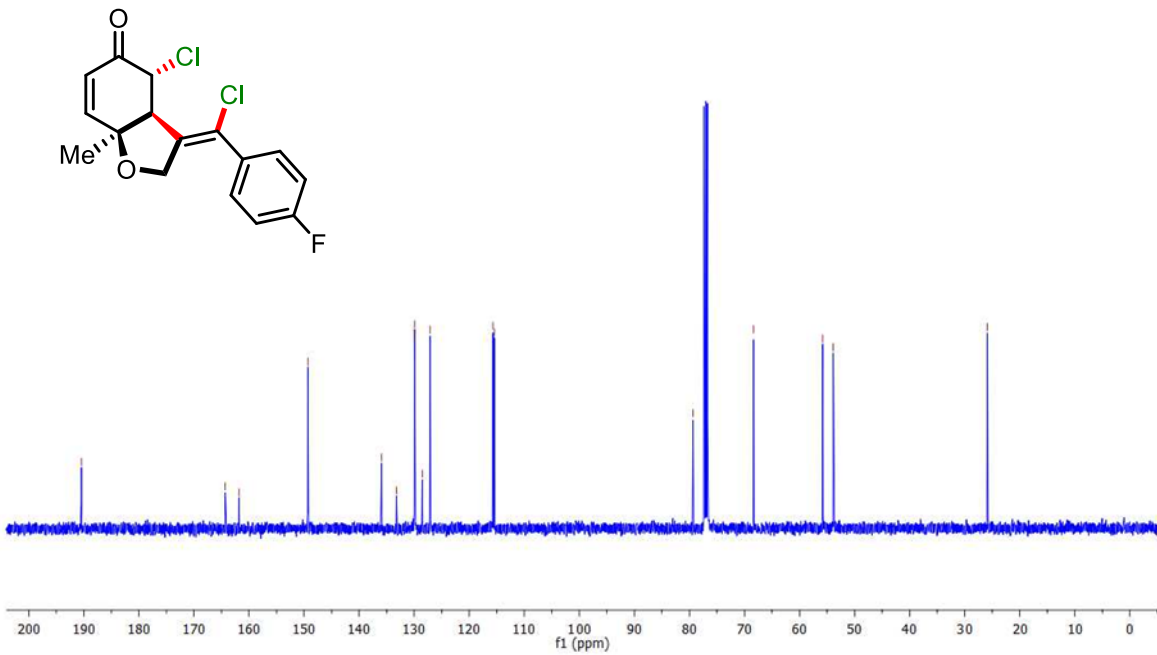

CMRV-AS-256-1H  
CMRV-AS-256-1H

7.34  
7.34  
7.33  
7.32  
7.26  
7.21  
7.20  
7.19  
7.19  
6.55  
6.53  
6.52  
6.52  
6.22  
6.20  
6.19  
5.02  
5.02  
5.01  
5.01  
4.18  
4.17  
4.12  
4.09  
3.61

(E)-4-chloro-3-(chloro(4-chlorophenyl)methylene)-7a-methyl-2,3,3a,4-tetrahydrobenzofuran-5(7aH)-one

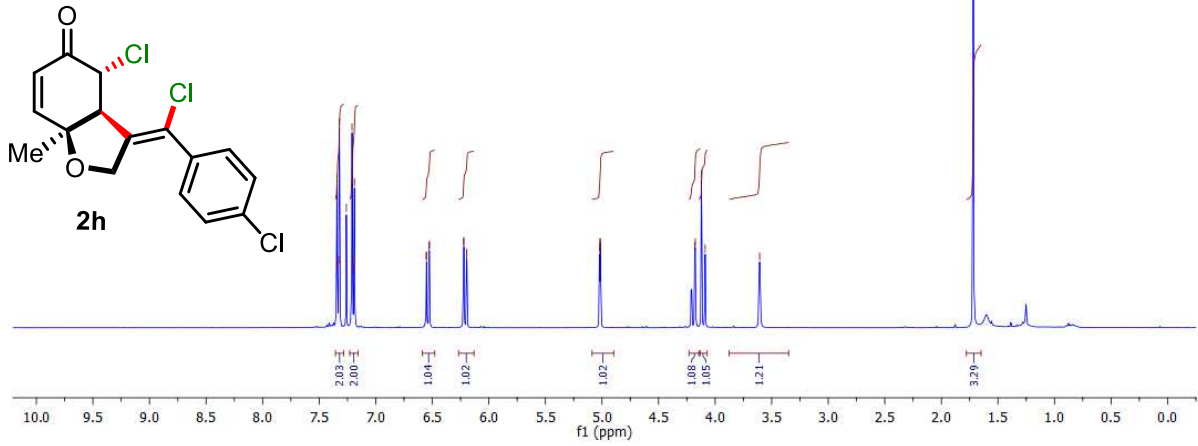

CMRV-AS-256-13C  
CMRV-AS-256-1H

148.42  
136.58  
135.72  
135.62  
128.33  
128.86  
128.56  
127.25  
79.47  
77.86  
77.74  
76.84  
68.45  
55.98  
53.96  
26.01

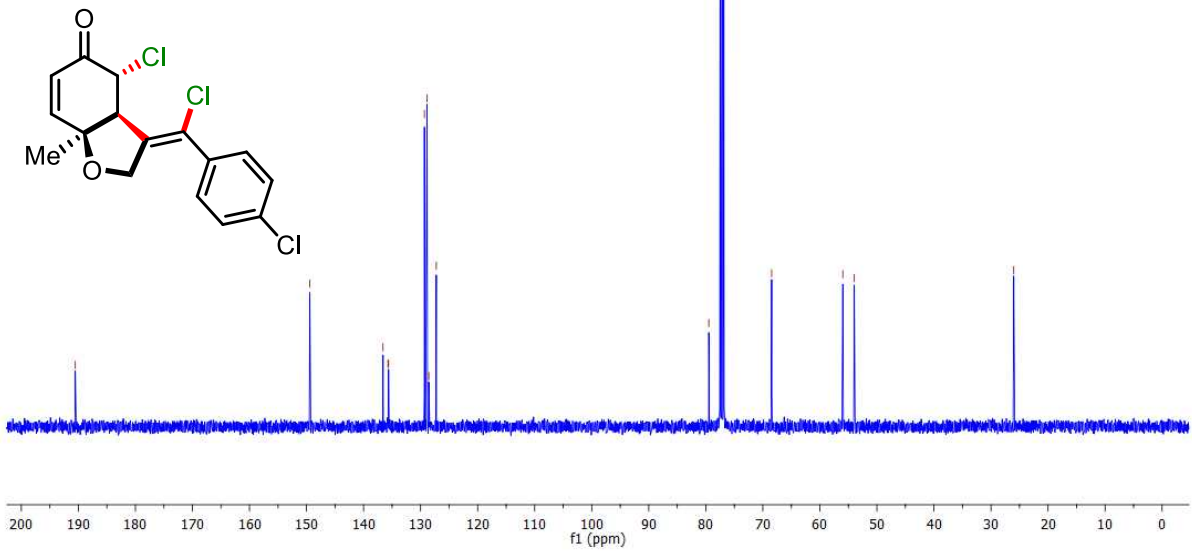

CMRV-AS-537-1H  
CMRV-AS-537-1H

7.52  
7.50  
7.17  
7.15  
6.57  
6.55  
6.34  
6.22  
5.04  
4.20  
4.14  
4.11  
3.62  
1.74

(3a*S*,4*R*,7a*S*,*E*)-3-((4-bromophenyl)chloromethylene)-4-chloro-7a-methyl-2,3,3a,4-tetrahydrobenzofuran-5(7a*H*)-one

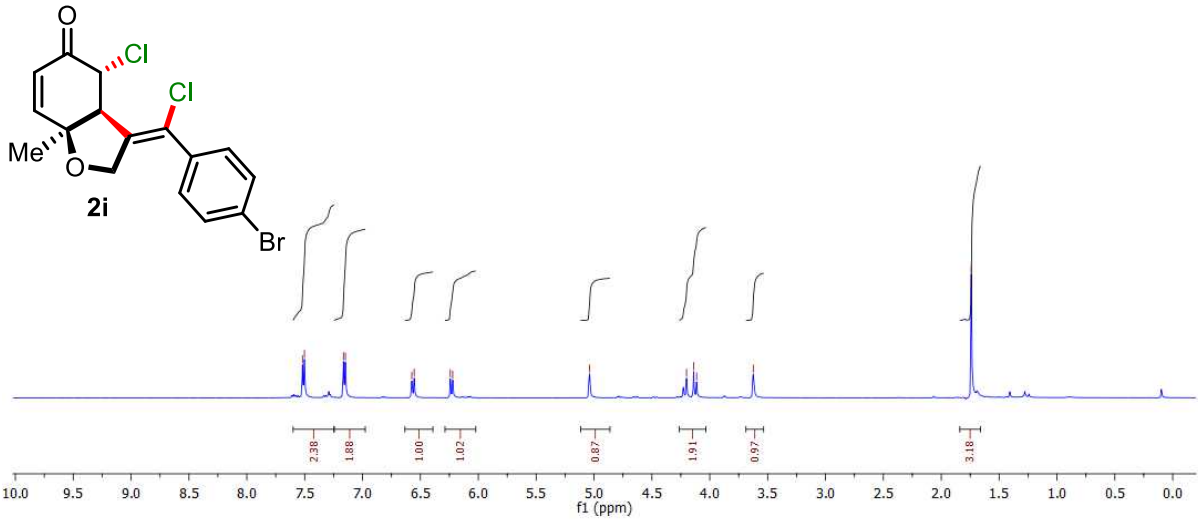

CMRV-AS-537-13C  
CMRV-AS-537-13C

140.39  
136.63  
136.03  
131.78  
129.52  
128.54  
127.21  
123.92  
79.42  
77.41  
77.16  
76.91  
68.90  
55.95  
53.90

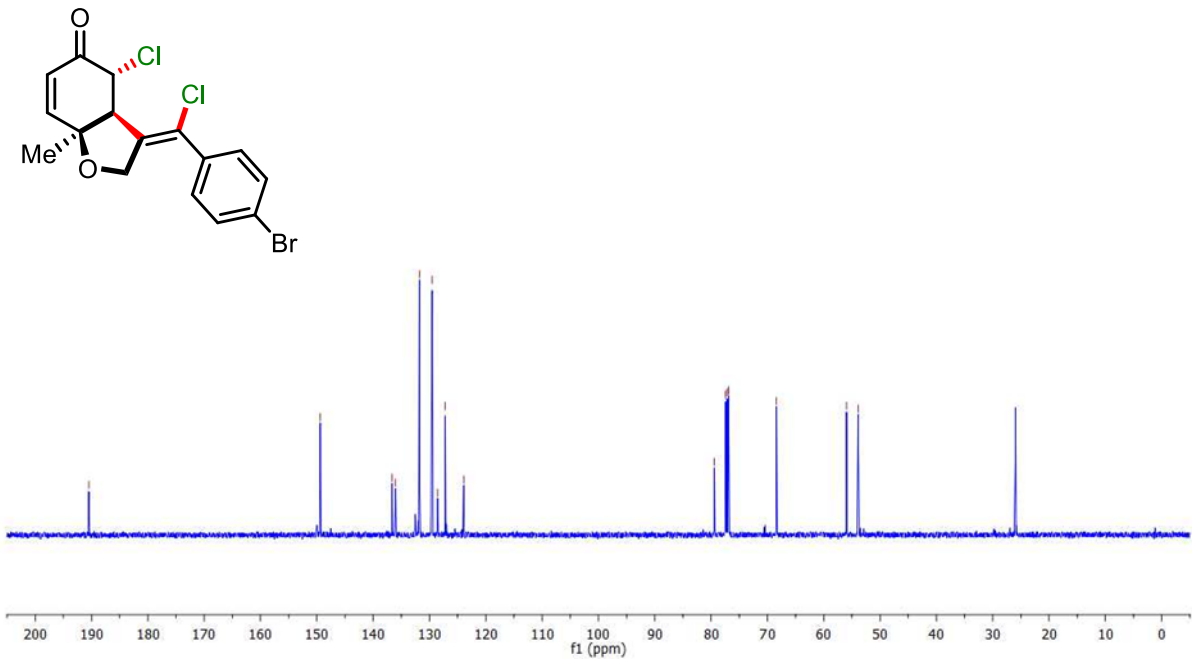



cmrv-as-253-1h  
CMRV-AS-253-1H

7.66, 7.64, 7.56, 7.54, 7.52, 7.51, 7.47, 7.46, 7.23, 6.58, 6.56, 6.26, 6.24, 5.06, 5.06, 5.05, 4.26, 4.24, 4.24, 4.11, 4.11, 3.66, 1.75

(E)-4-chloro-3-(chloro(3-(trifluoromethyl)phenyl)methylene)-7a-methyl-  
2,3,3a,4-tetrahydrobenzofuran-5(7aH)-one

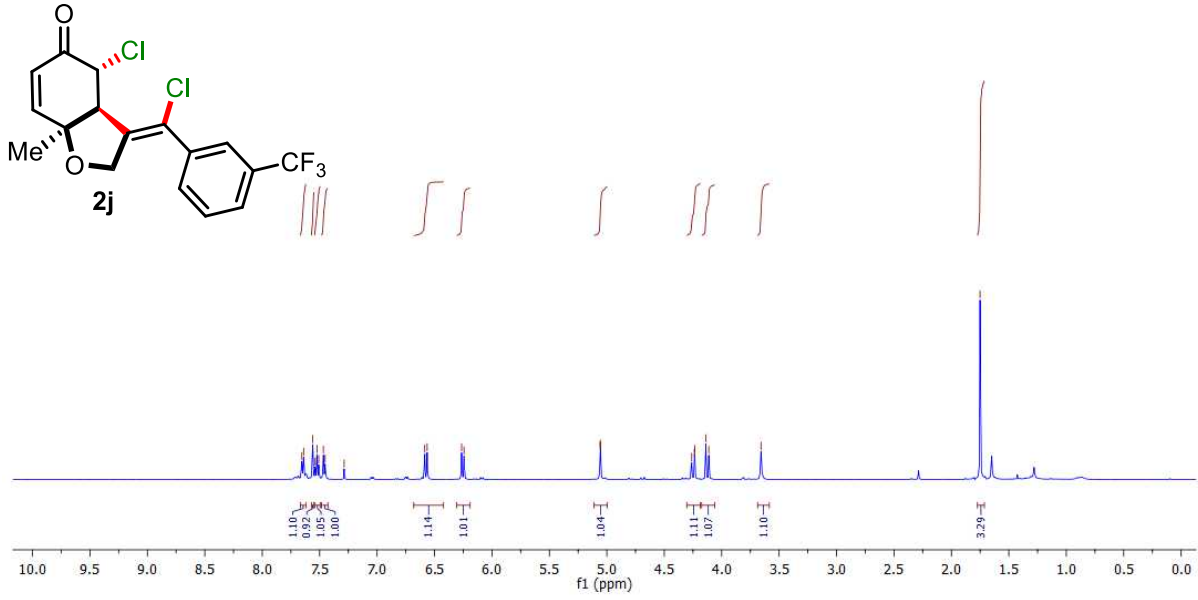

CMRV-AS-253-13C  
CMRV-AS-253-13C

149.36, 137.97, 137.76, 131.26, 129.24, 127.31, 126.38, 124.86, 124.83, 115.30, 79.53, 77.16, 76.91, 68.32, 56.05, 53.93, 26.00

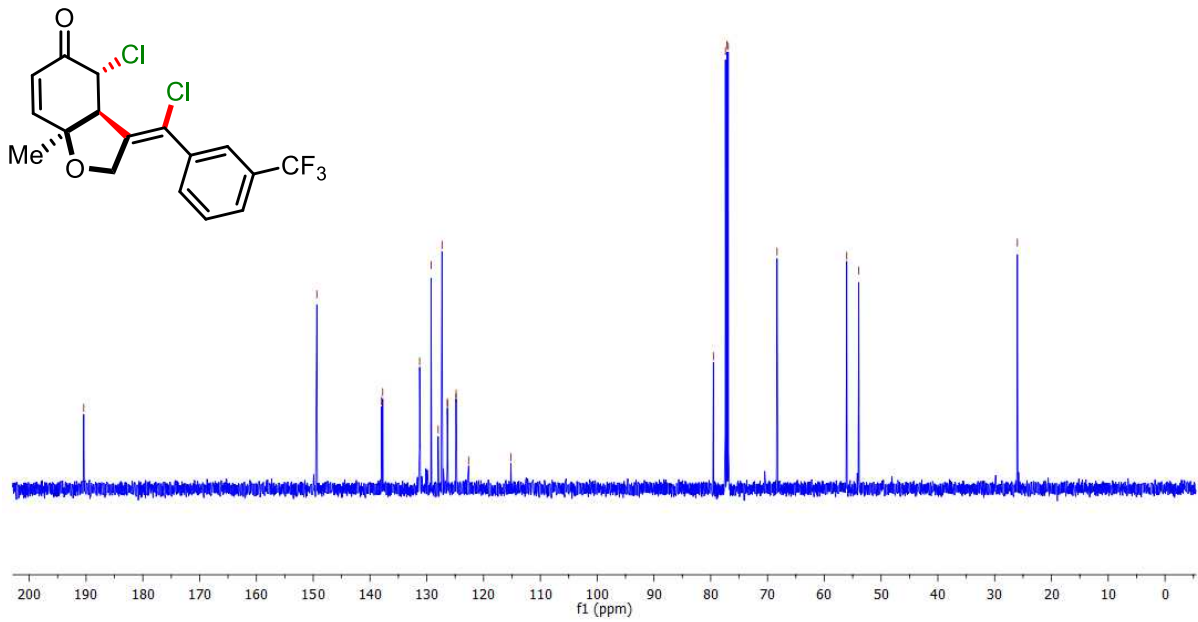

CMRV-AS-213-1H  
CMRV-AS-213-1H

7.95  
7.94  
7.92  
7.37  
7.36  
6.57  
6.54  
6.24  
6.21  
5.03  
5.03  
5.03  
4.35  
4.32  
4.14  
4.11  
4.10  
3.83  
2.61  
2.61  
1.73  
1.72

(E)-3-((4-acetylphenyl)chloromethylene)-4-chloro-7a-methyl-2,3,3a,4-tetrahydrobenzofuran-5(7aH)-one

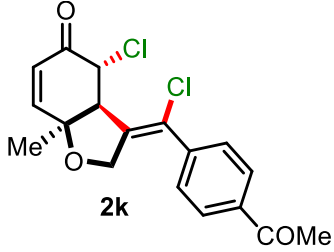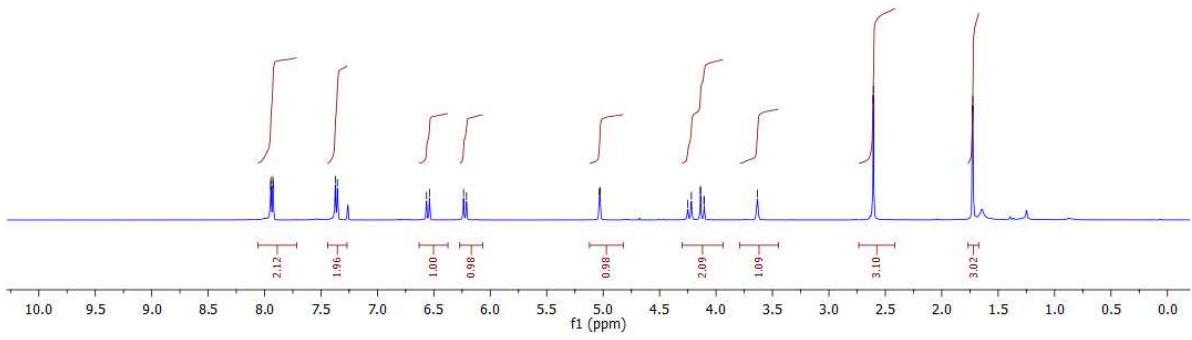

CMRV-AS-213-13C  
CMRV-AS-213-13C

149.38  
141.38  
137.86  
137.72  
128.54  
128.31  
127.31  
79.47  
77.16  
76.91  
68.96  
55.12  
53.94  
26.82  
26.02

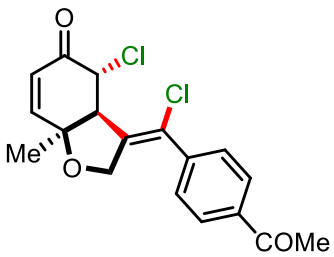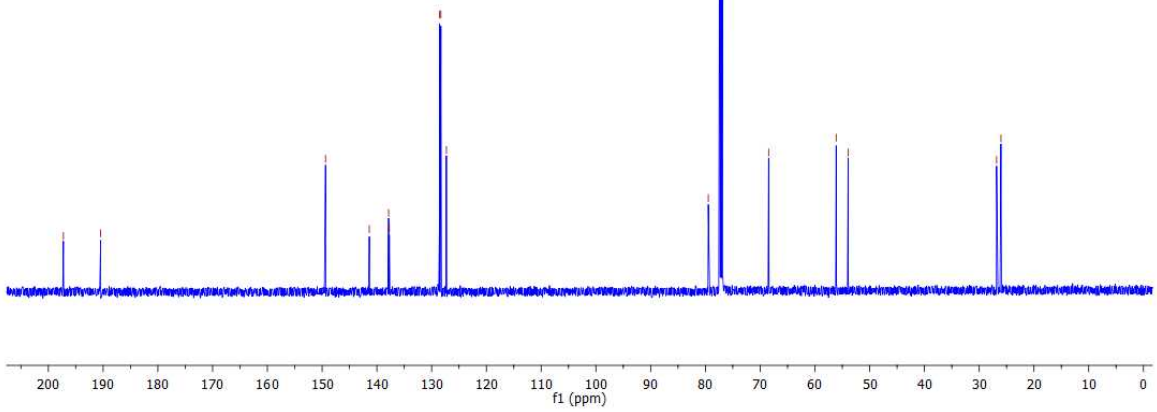

CMRV-AS-287-1H  
CMRV-AS-284-1H

8.32, 8.27, 8.21, 8.20, 7.46, 7.45, 7.44, 7.43, 7.43, 7.24, 6.56, 6.56, 6.53, 6.53, 6.23, 6.23, 6.21, 6.21, 5.00, 5.00, 5.00, 4.99, 4.25, 4.25, 4.22, 4.22, 4.12, 4.12, 4.09, 4.09, 3.64, 3.63, 3.62

(E)-4-chloro-3-(chloro(4-nitrophenyl)methylene)-7a-methyl-2,3,3a,4-tetrahydrobenzofuran-5(7aH)-one

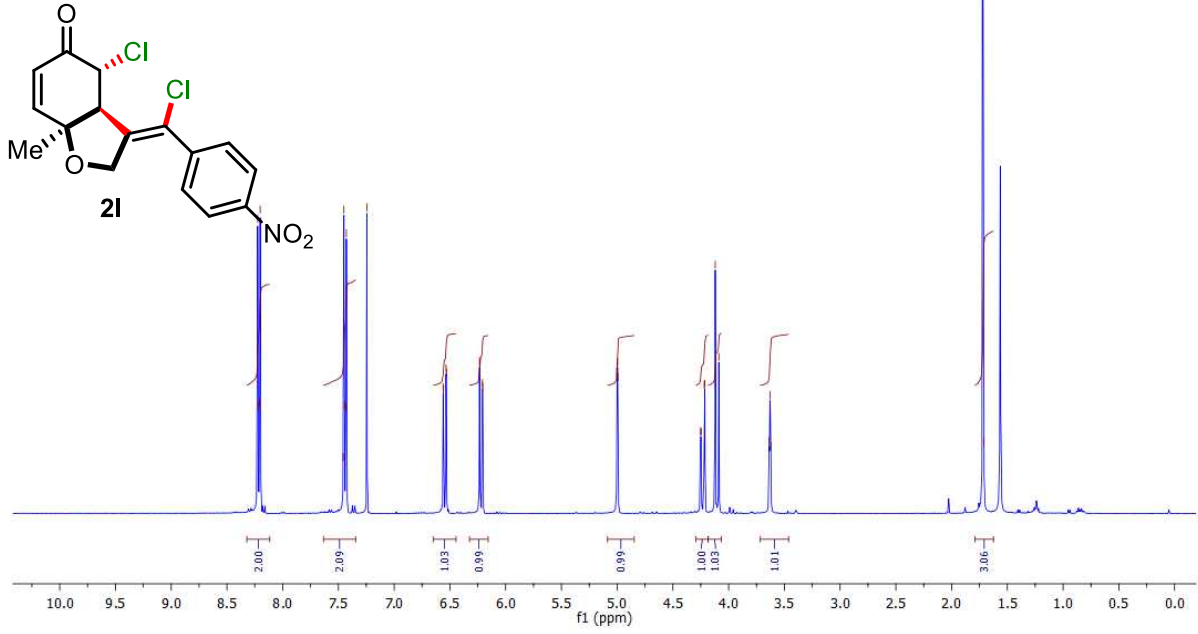

CMRV-AS-287-13C  
CMRV-AS-284-13C

149.24, 143.06, 139.44, 129.06, 127.39, 127.26, 123.00, 79.57, 77.86, 77.16, 76.84, 69.33, 56.22, 53.79, 26.00

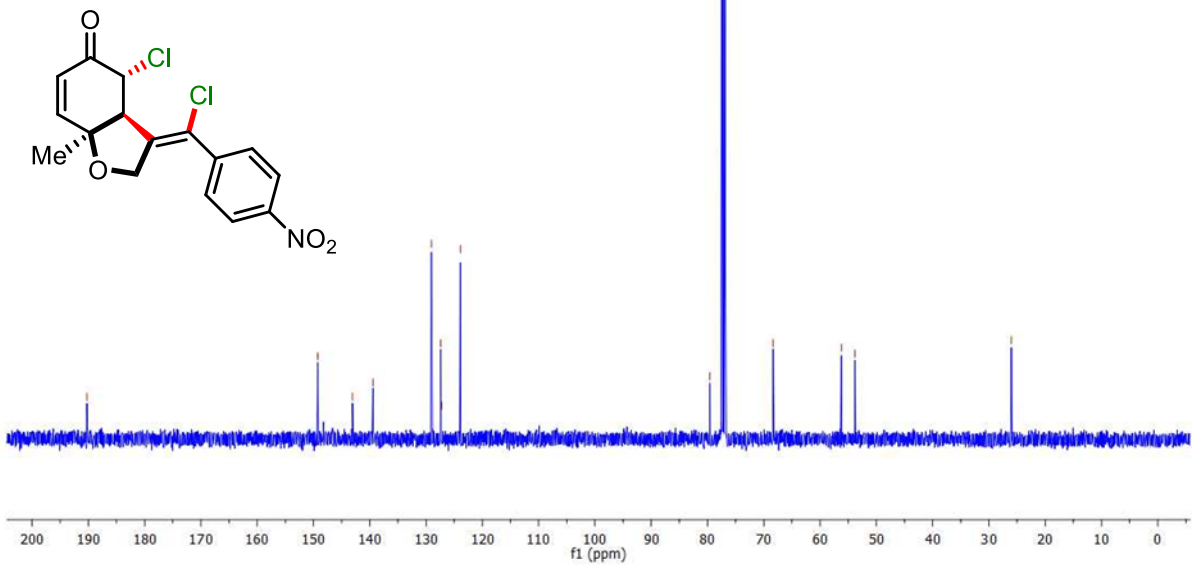

CMRV-AS-262-1H  
CMRV-AS-262-1H

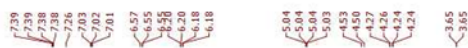

(E)-4-chloro-3-(chloro(thiophen-2-yl)methylene)-7a-methyl-2,3,3a,4-tetrahydrobenzofuran-5(7aH)-one

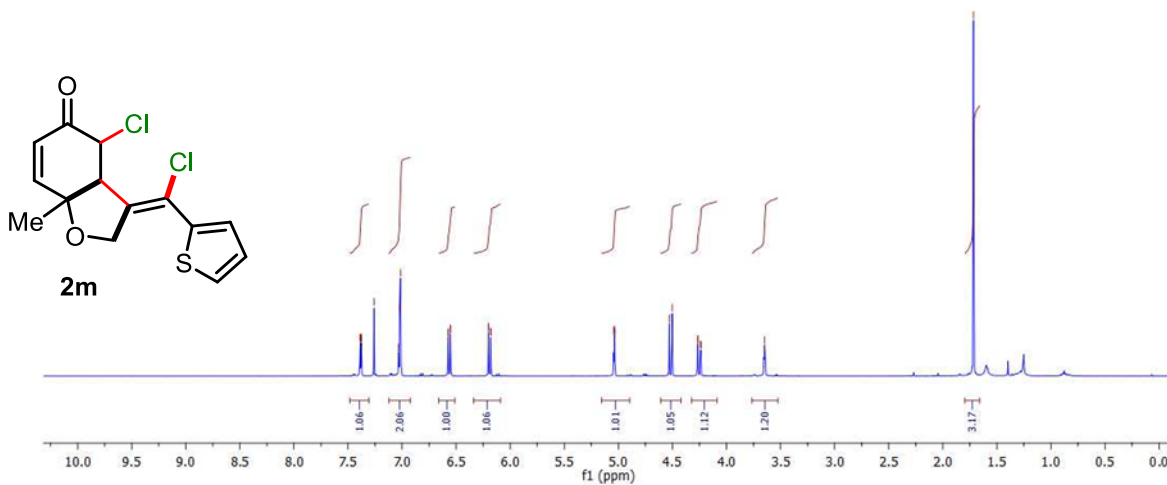

CMRV-AS-262-13C  
CMRV-AS-262-13C

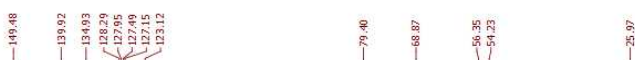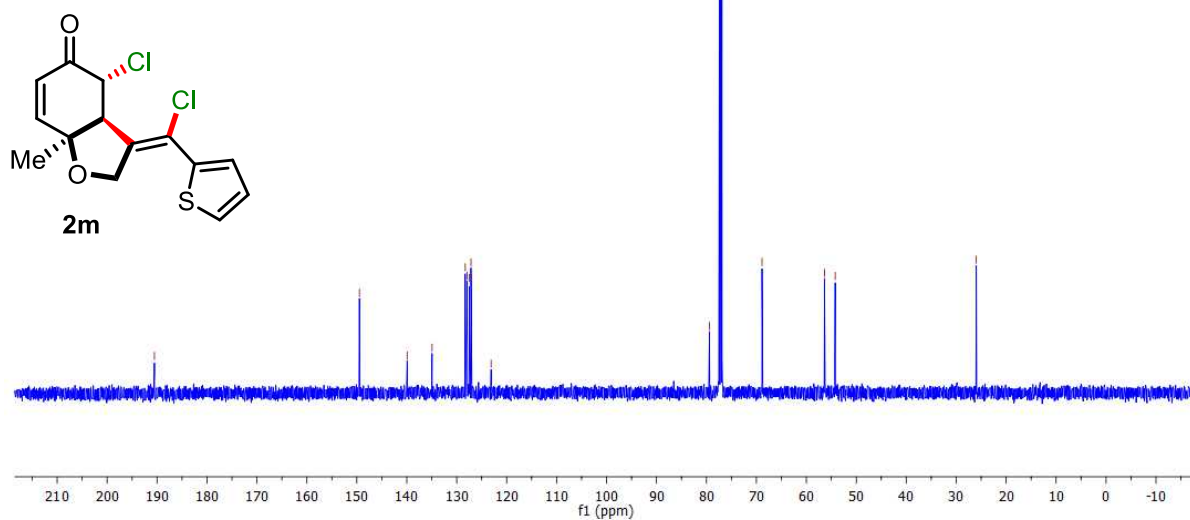

CMRV-AS-547-1H  
CMRV-AS-547-1H

7.26  
6.50  
6.50  
6.48  
6.47  
6.13  
6.12  
6.10  
5.03  
5.02  
5.02  
4.36  
4.33  
4.01  
4.01  
3.98  
3.88  
2.26  
2.24  
2.22  
2.20  
1.68  
1.11  
1.09  
1.07

(E)-4-chloro-3-(1-chloropropylidene)-7a-methyl-  
2,3,3a,4-tetrahydrobenzofuran-5(7aH)-one

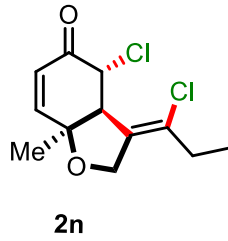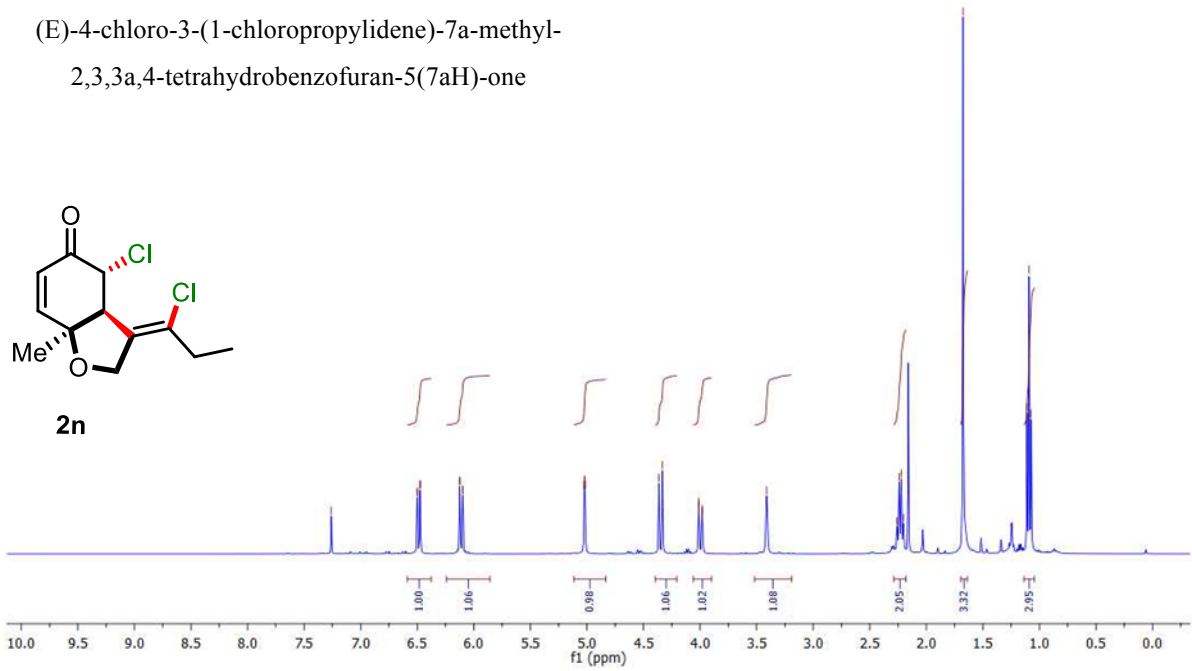

CMRV-AS-547-13C  
CMRV-AS-547-13C

199.56  
132.95  
132.37  
126.94  
79.77  
79.68  
77.16  
76.84  
67.36  
54.75  
54.28  
30.84  
25.99  
12.09

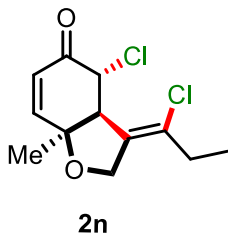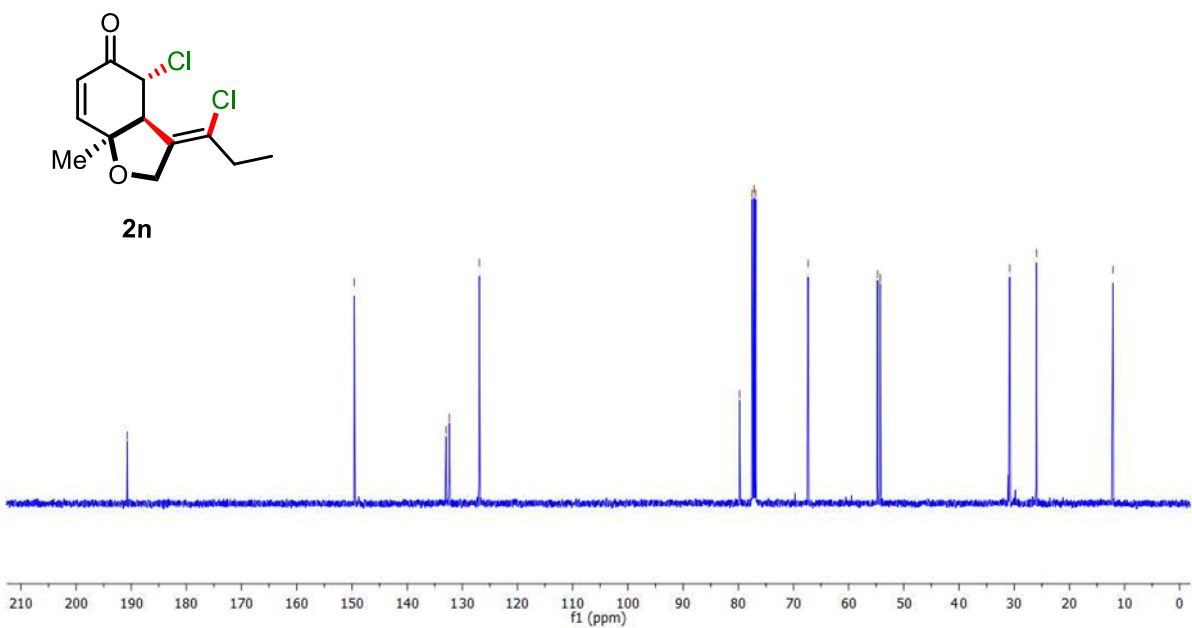

CMRV-as-273-1h  
CMRV-as-273-1h

7.36  
7.36  
7.35  
7.35  
7.28  
7.27  
7.27  
7.27  
6.62  
6.62  
6.25  
6.25  
6.23  
6.23  
5.04  
5.04  
5.03  
5.03  
4.37  
4.26  
4.23  
4.23  
4.16  
4.13  
3.72  
3.72  
3.71  
3.71  
3.71  
3.71  
2.08  
2.06  
2.04  
2.00  
2.00  
1.99  
1.58  
1.25  
1.18  
1.06  
1.06

(E)-4-chloro-3-(chloro(phenyl)methylene)-7a-ethyl-2,3,3a,4-tetrahydrobenzofuran-5(7aH)-one

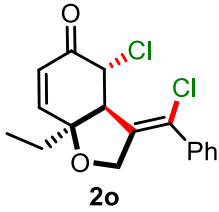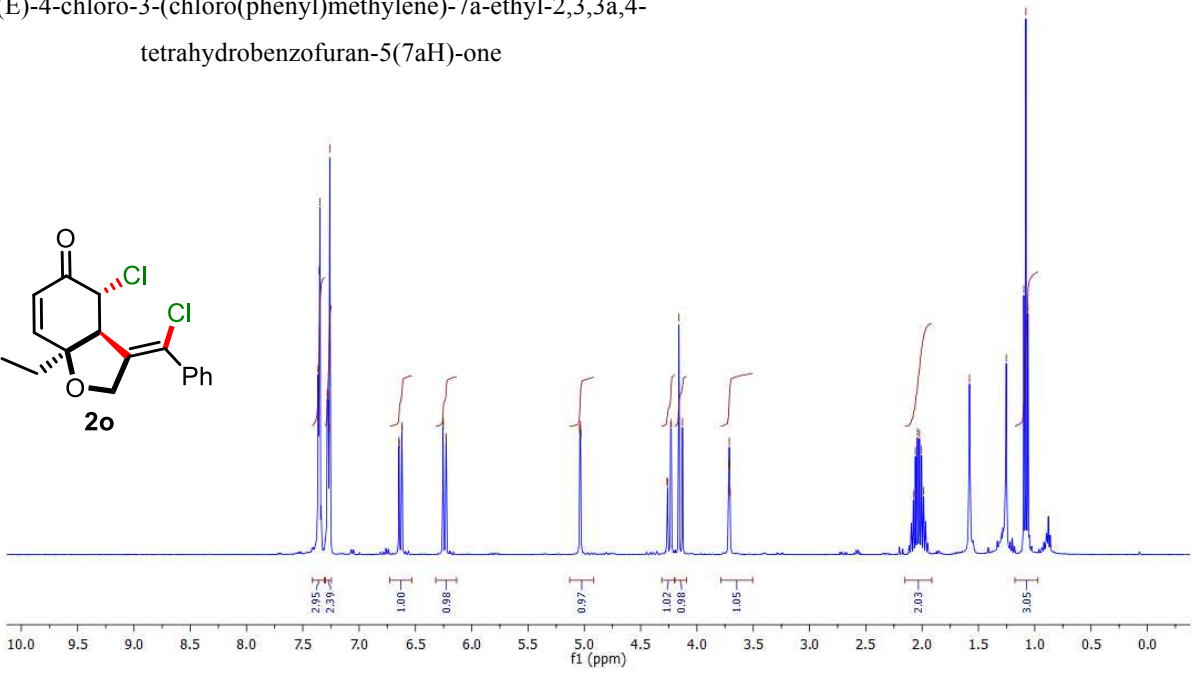

CMRV-AS-273-13C  
CMRV-AS-273-13C

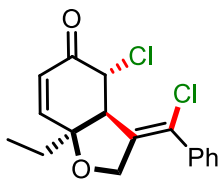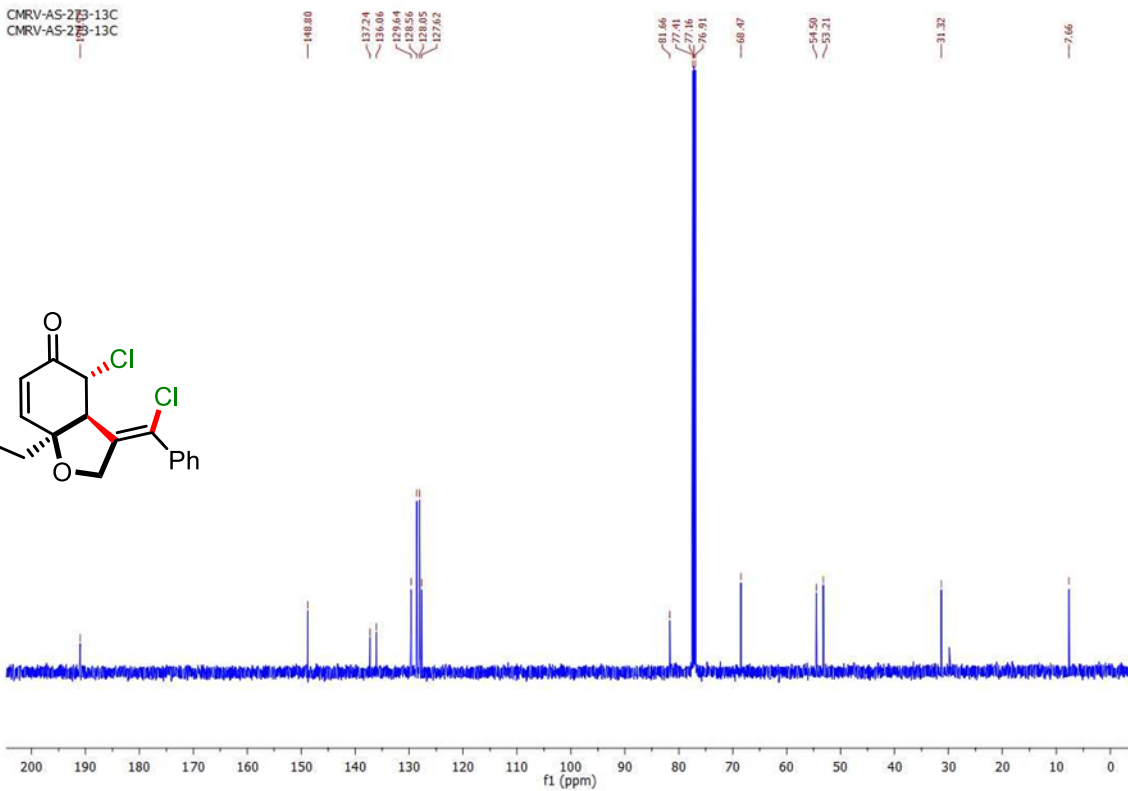

CMRV-AS-525-13C  
CMRV-AS-525-13C

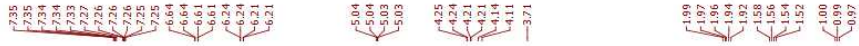

(E)-4-chloro-3-(chloro(phenyl)methylene)-7a-propyl-2,3,3a,4-tetrahydrobenzofuran-5(7aH)-one

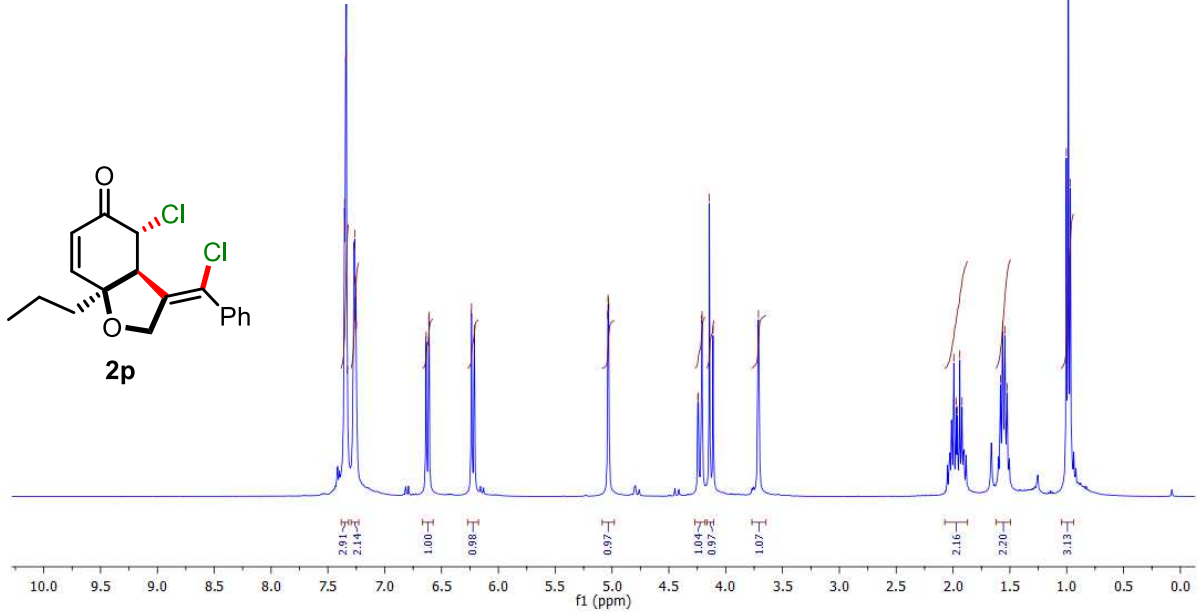

CMRV-AS-525-13C-RE  
CMRV-AS-525-13C-RE

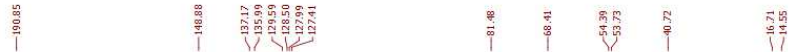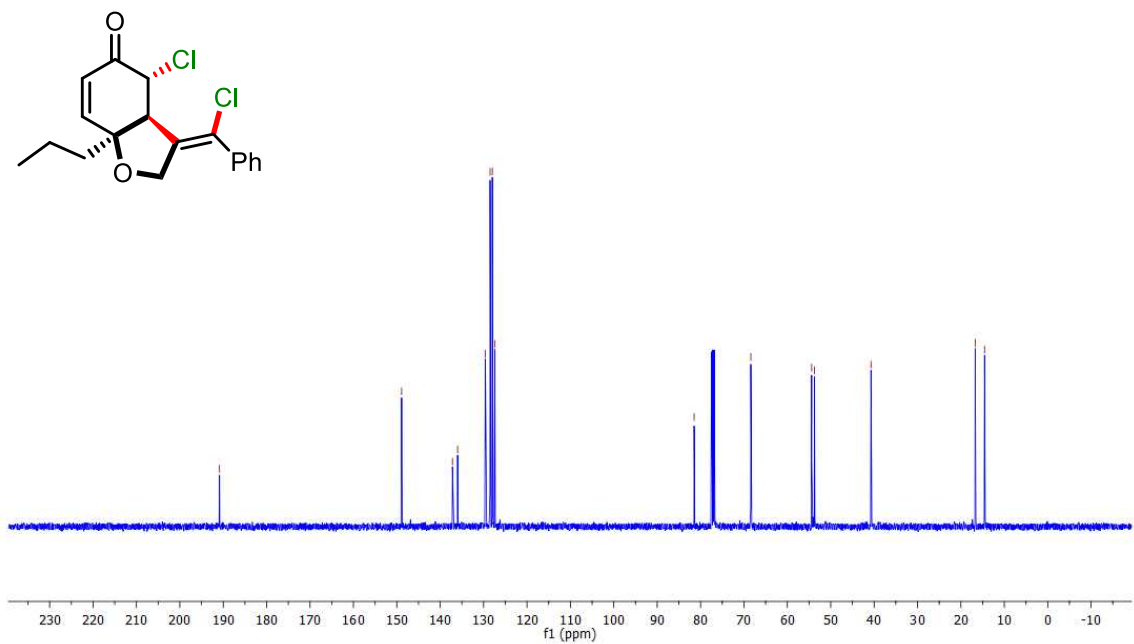

CMRV-AS-509-1H  
CMRV-AS-510-1H

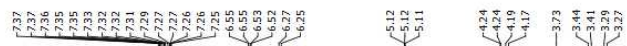

(E)-7a-benzyl-4-chloro-3-(chloro(phenyl)methylene)-2,3,3a,4-tetrahydrobenzofuran-5(7aH)-one

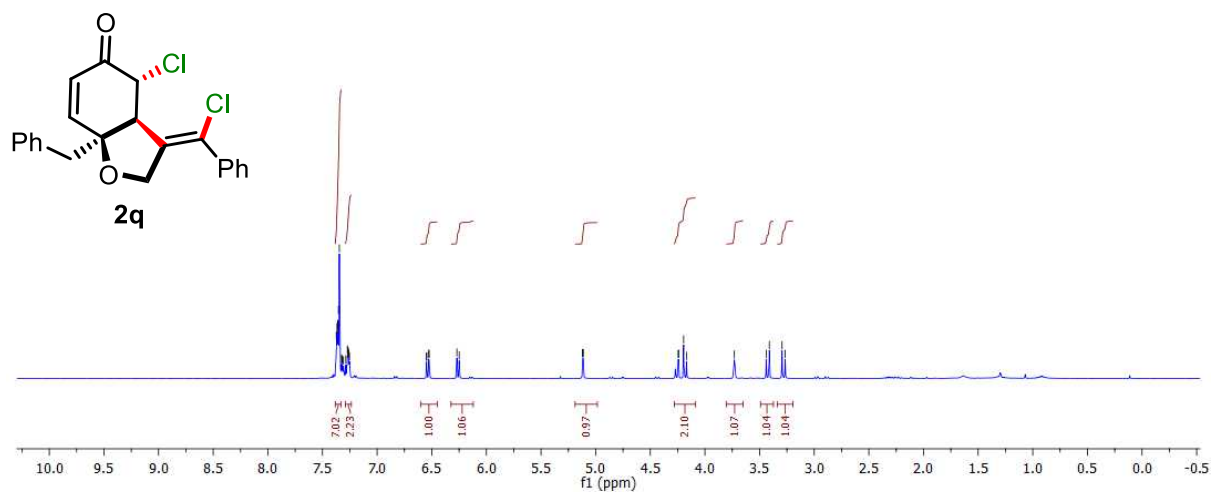

CMRV-AS-510-13C  
CMRV-AS-510-13C

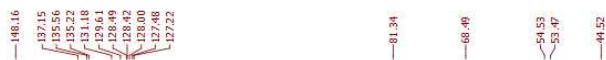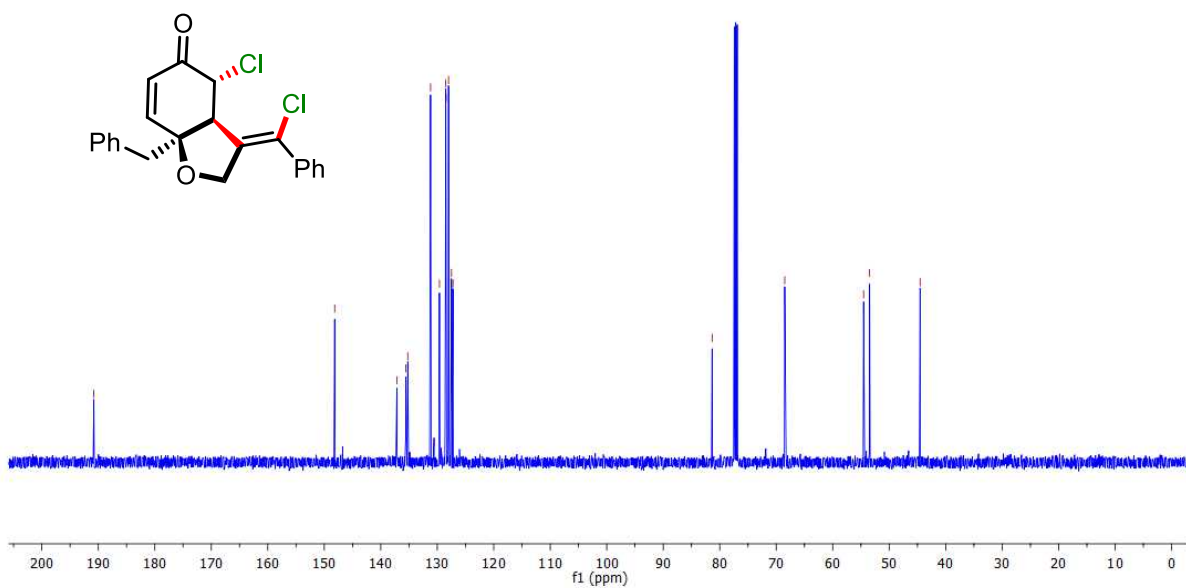



cmv-as-285-1h  
cmv-as-285-1h

7.36  
7.36  
7.35  
7.35  
7.28  
7.28  
7.26  
7.26  
7.25  
7.25  
6.71  
6.71  
6.69  
6.69  
6.24  
6.24  
6.21  
6.21  
5.04  
5.04  
5.03  
5.03  
4.27  
4.27  
4.24  
4.24  
4.23  
4.23  
4.13  
4.13  
3.83  
3.83  
3.65  
3.65  
3.56  
3.56  
3.27  
3.27  
2.36  
2.36  
2.34  
2.34  
2.33  
2.33  
2.27  
2.27  
2.25  
2.25  
2.24  
2.24  
2.21  
2.21

(E)-4-chloro-3-(chloro(phenyl)methylene)-7a-(2-methoxyethyl)-  
2,3,3a,4-tetrahydrobenzofuran-5(7aH)-one

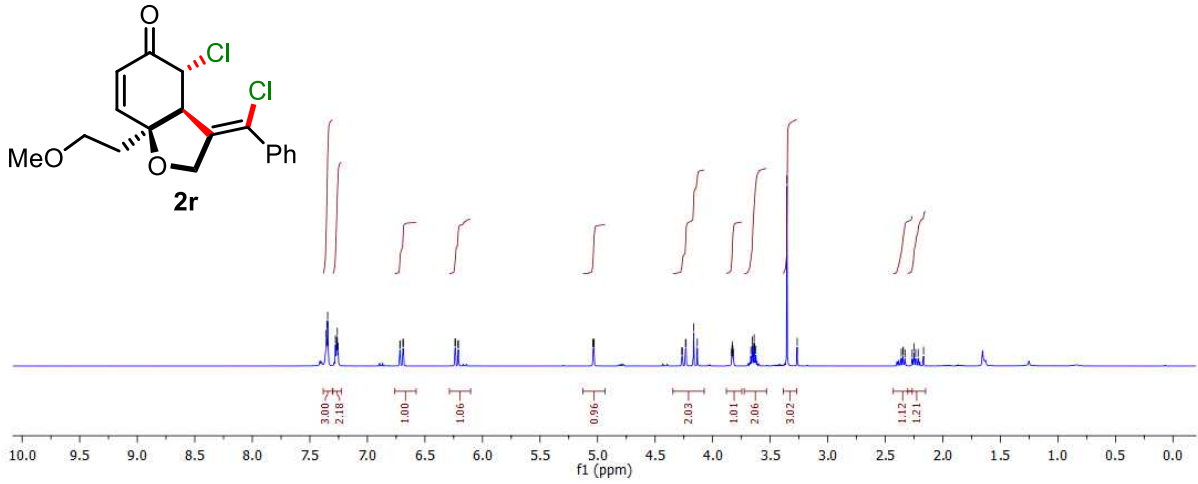

cmv-as-285-13c  
cmv-as-285-13c

148.58  
137.18  
135.62  
129.69  
129.65  
128.54  
128.02  
127.27  
80.57  
68.51  
67.77  
58.75  
54.69  
54.40  
38.43

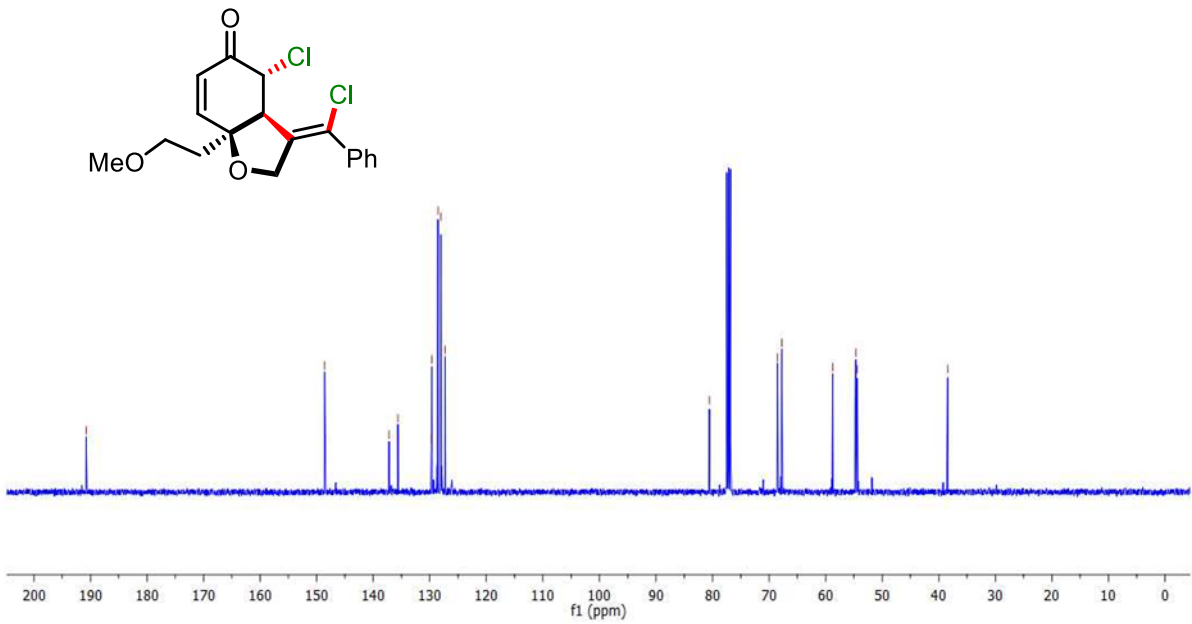

CMRV-AS-283-1H  
CMRV-AS-283-1H

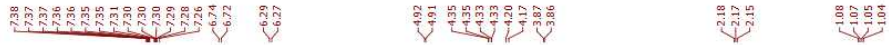

(E)-4-chloro-3-(chloro(phenyl)methylene)-7a-isopropyl-2,3,3a,4-tetrahydrobenzofuran-5(7aH)-one

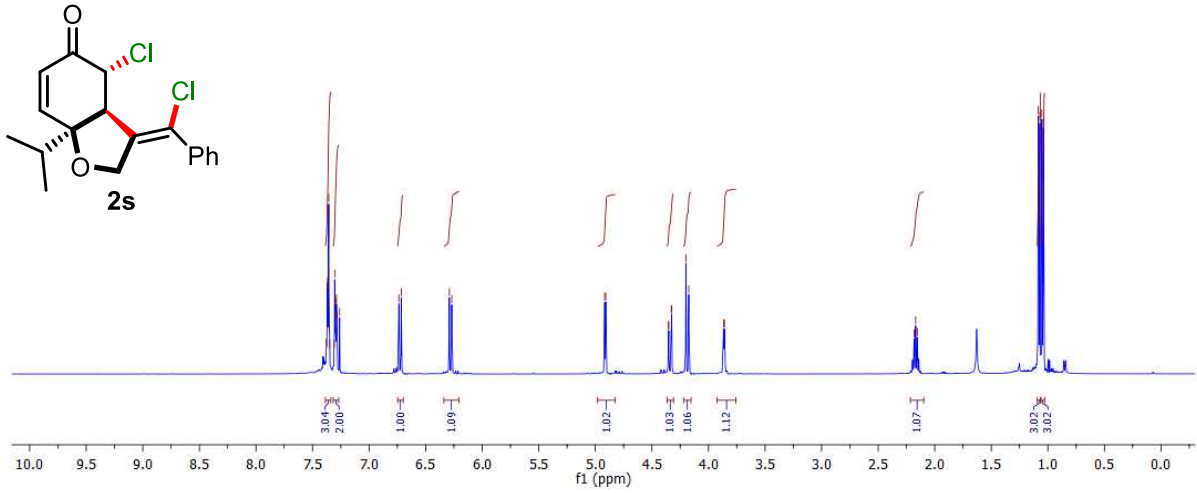

CMRV-AS-283-13C  
CMRV-AS-283-13C

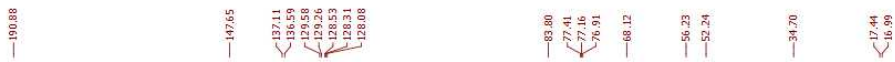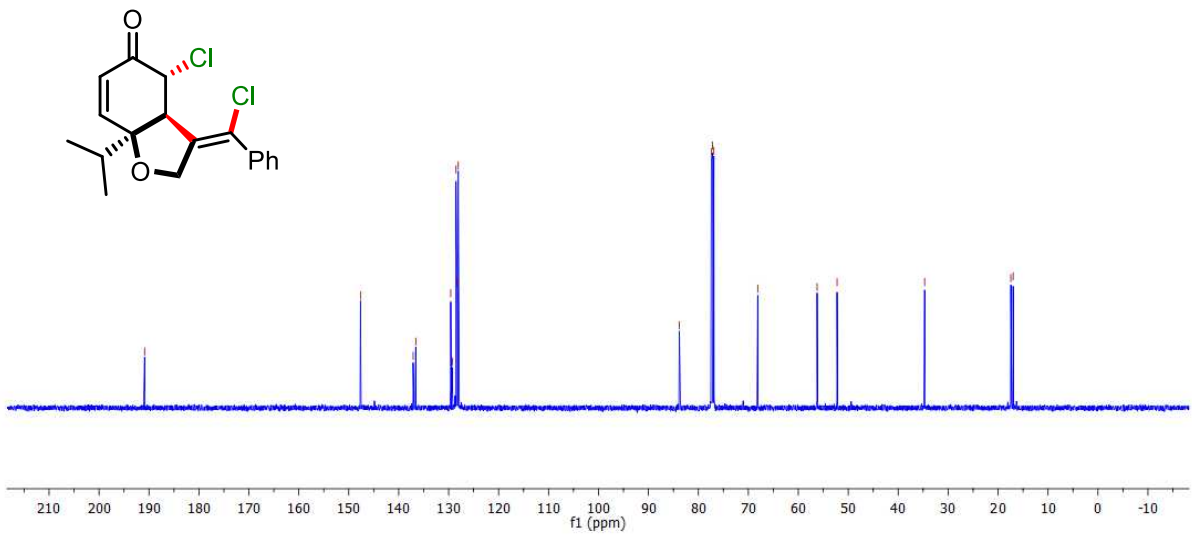

cmv-as-291-1H  
cmv-as-291-1H

(E)-7a-((S)-sec-butyl)-4-chloro-3-(chloro(phenyl)methylene)-2,3,3a,4-tetrahydrobenzofuran-5(7aH)-one

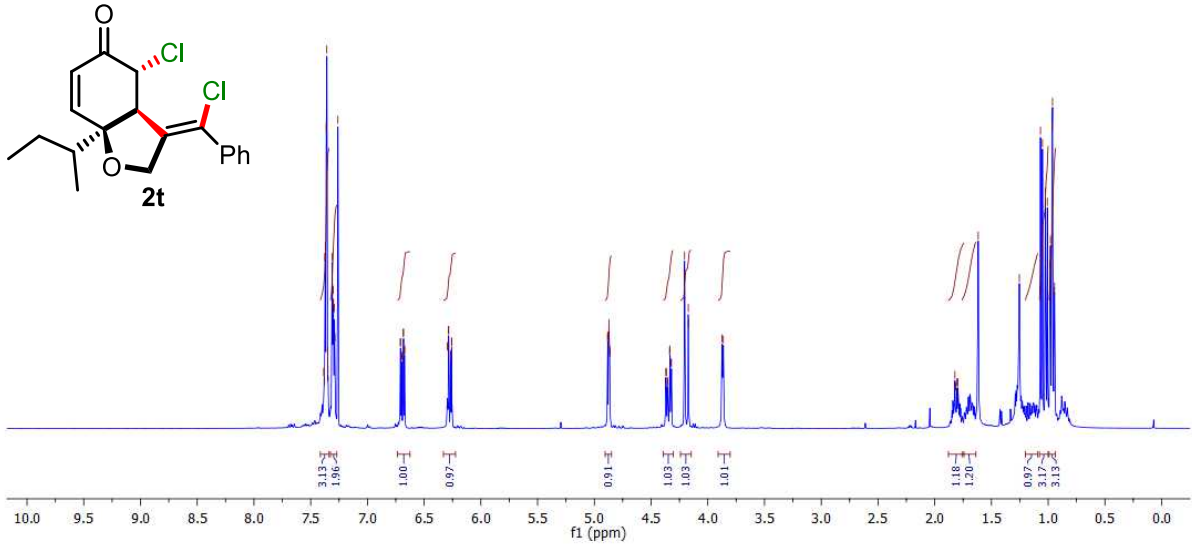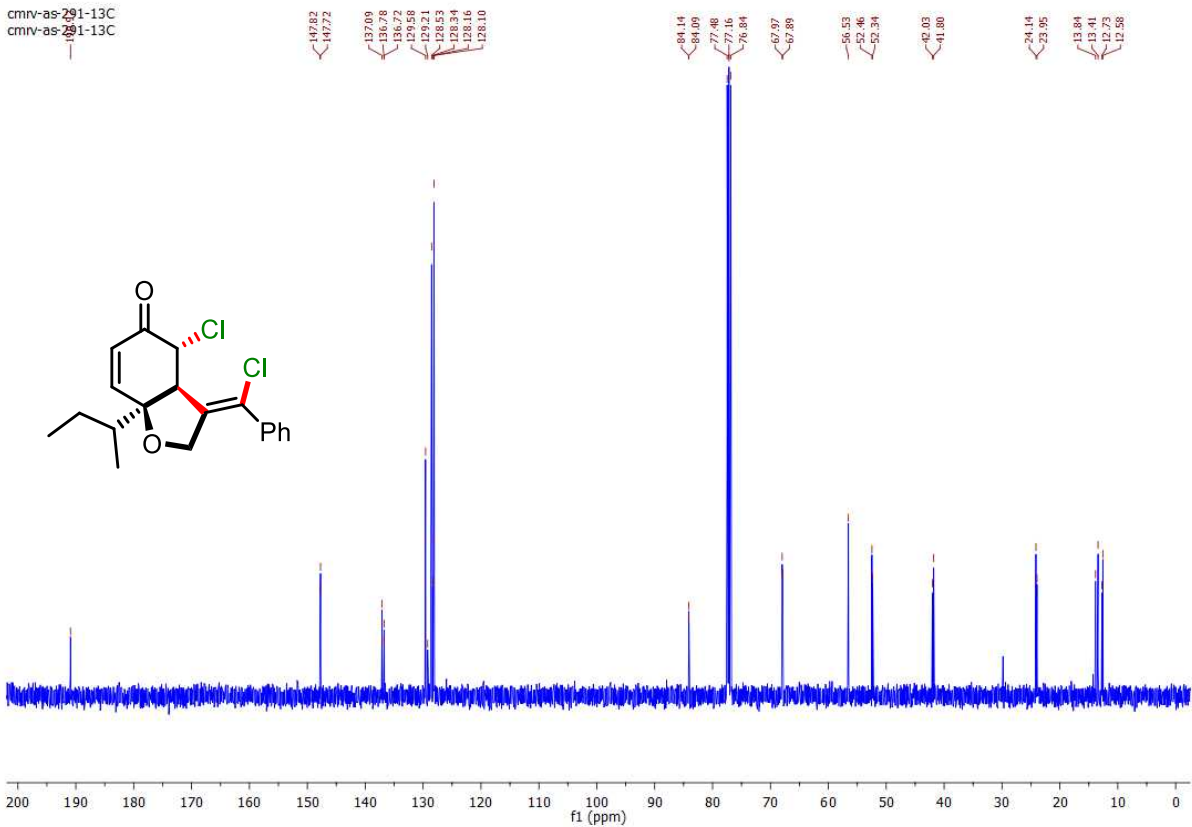

(E)-4-chloro-3-(chloro(phenyl)methylene)-7a-phenyl-2,3,3a,7a-tetrahydrobenzofuran-5(4H)-one

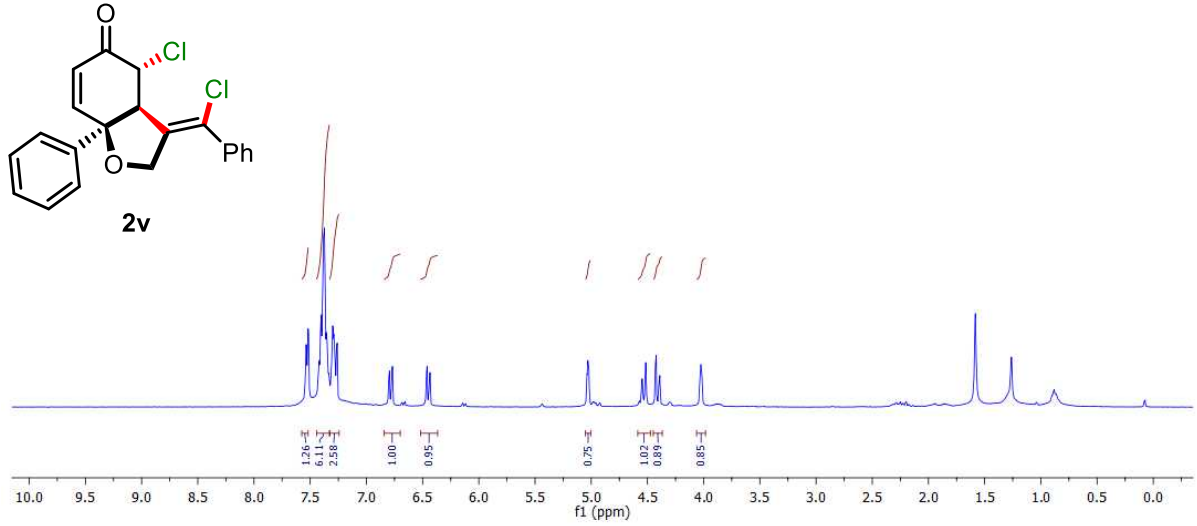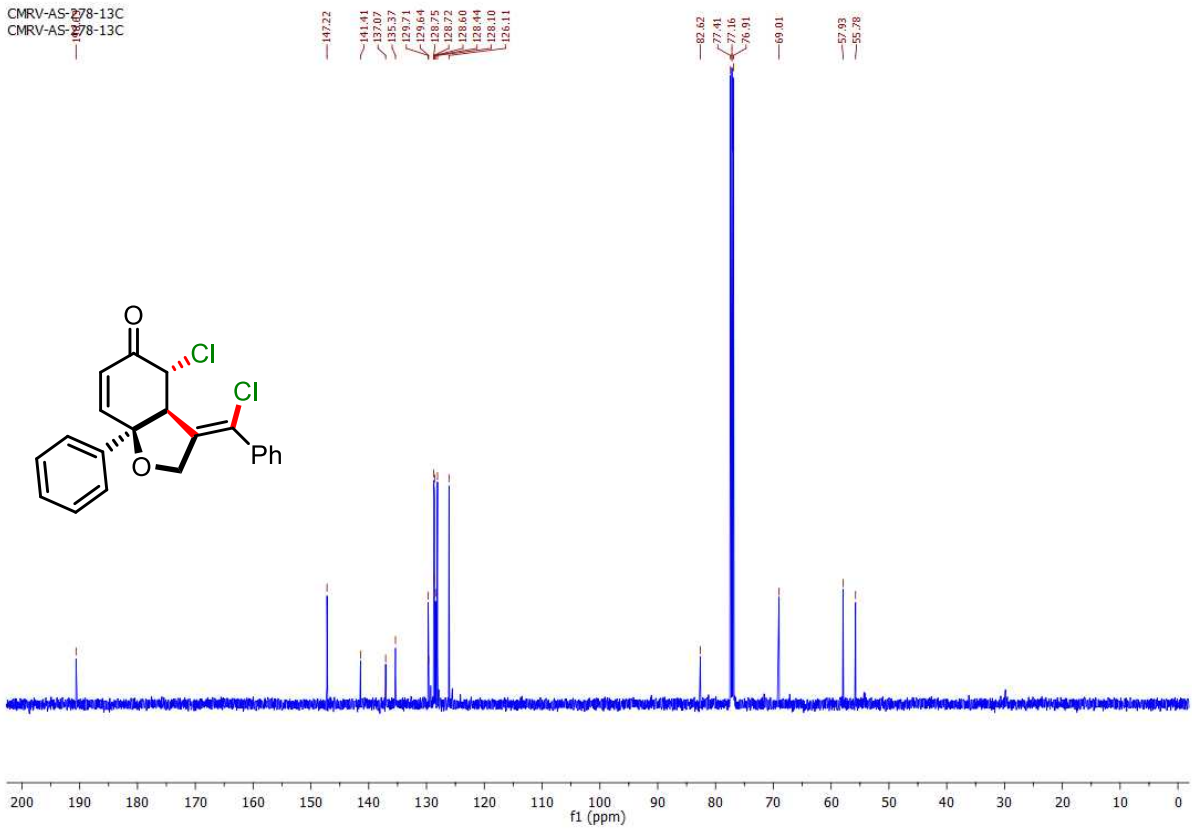

CMRV-AS-540-1H  
CMRV-AS-540-1H

7.235  
7.235  
7.234  
7.234  
7.225  
7.225  
6.11  
6.10  
5.13  
5.13  
5.12  
5.12  
4.08  
3.60  
2.05  
1.74

(3a*S*,4*R*,7*aR*,*E*)-4-chloro-3-(chloro(phenyl)methylene)-7,7a-dimethyl-2,3,3a,7a-tetrahydrobenzofuran-5(4*H*)-one

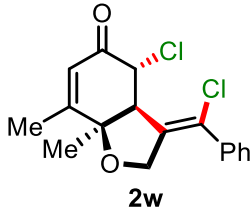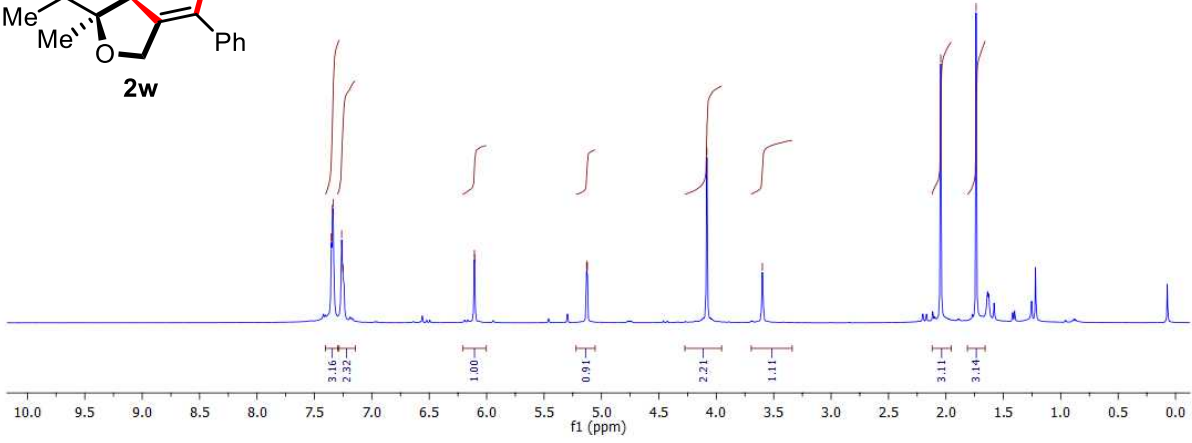

CMRV-AS-540-13C  
CMRV-AS-540-13C

160.13  
137.23  
135.75  
129.47  
128.40  
127.89  
126.04  
81.60  
68.65  
56.87  
54.02  
24.63  
18.95

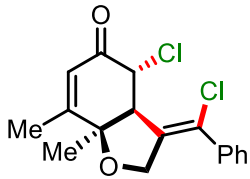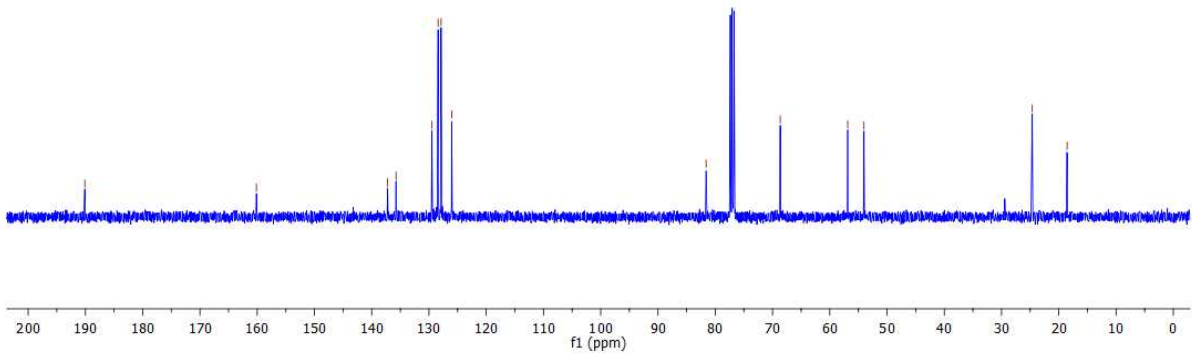

CMRV-AS-559-1H  
CMRV-AS-559-1H

7.36  
7.35  
7.35  
7.28  
7.27  
7.26  
7.26  
6.32  
4.21  
4.18  
4.18  
4.13  
4.10  
3.61  
1.95  
1.95  
1.70

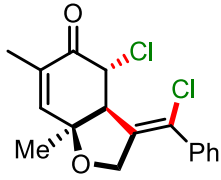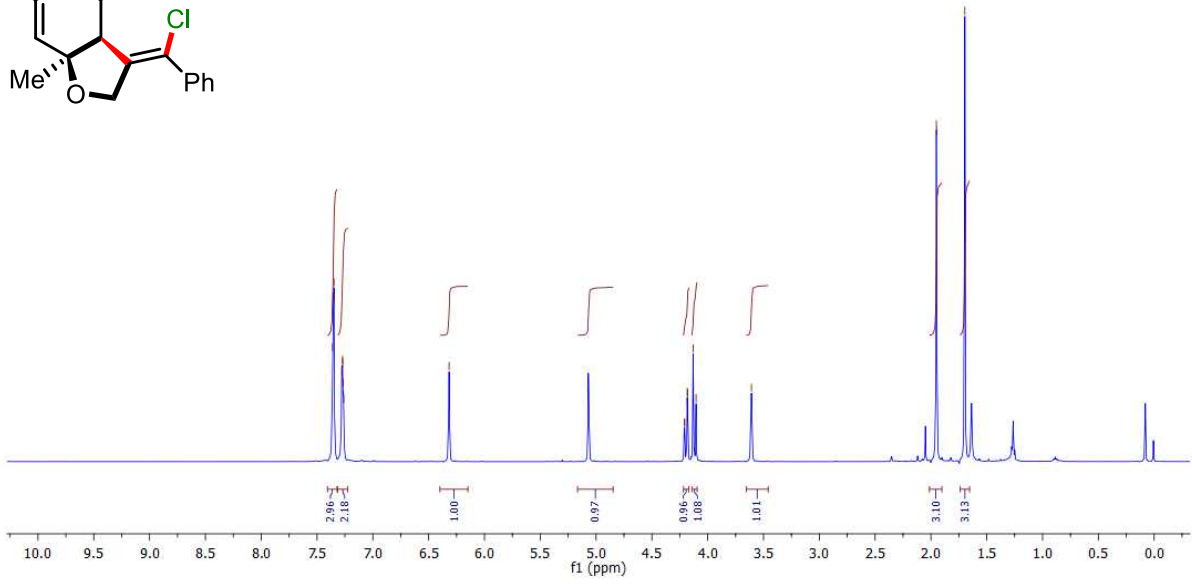

CMRV-AS-559-13C  
CMRV-AS-559-13C

191.48  
144.65  
137.24  
136.25  
128.67  
128.67  
128.51  
128.02  
79.74  
77.41  
77.16  
76.91  
88.35  
56.06  
54.69  
26.43  
16.17

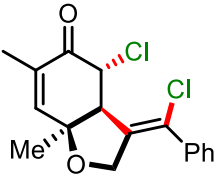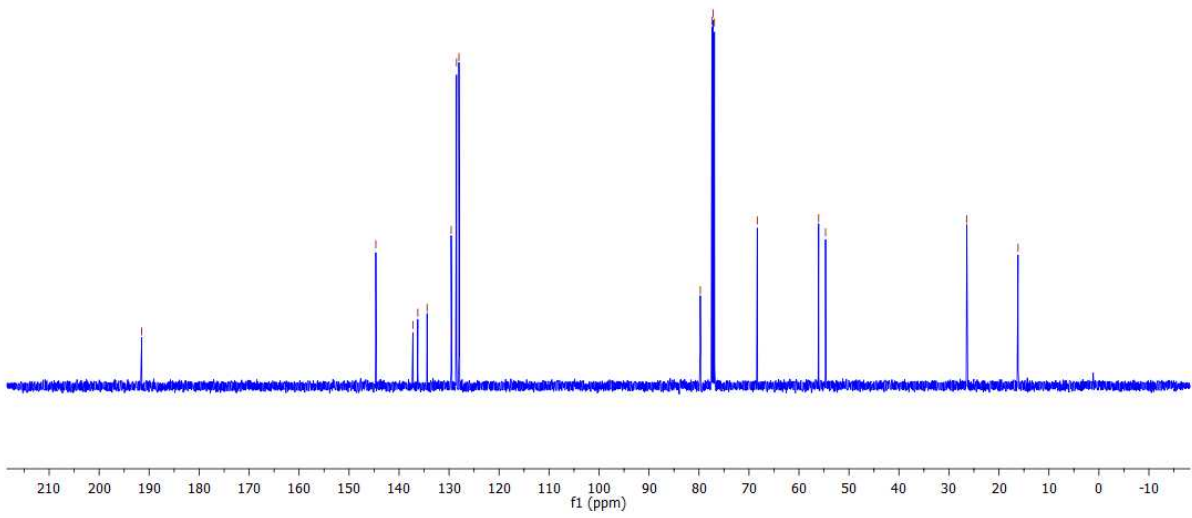

cmv-rs-796-1h  
cmv-rs-796-1h

7.35  
7.34  
7.34  
7.33  
7.32  
7.31  
7.28  
7.28  
7.24  
7.23  
7.23  
6.50  
6.49  
6.47  
6.47  
6.43  
6.21  
6.20  
5.18  
5.18  
5.17  
4.12  
4.12  
4.11  
4.09  
4.09  
4.07  
4.03  
3.57  
3.56  
1.75

(E)-4-bromo-3-(bromo(phenyl)methylene)-7a-methyl-2,3,3a,4-tetrahydrobenzofuran-5(7aH)-one

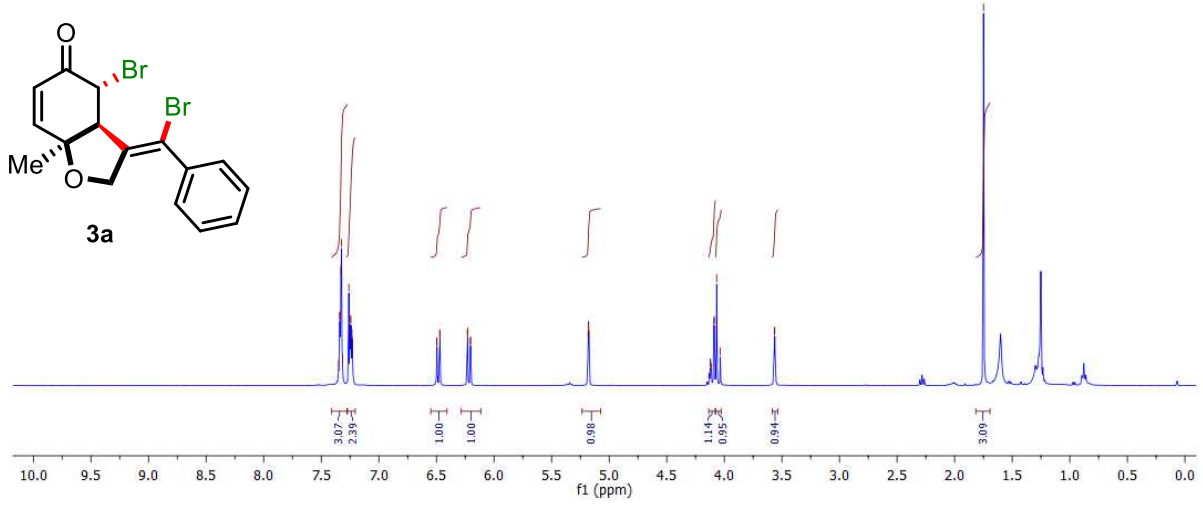

cmv-rs-796-13c  
cmv-rs-796-13c

149.10  
139.83  
138.84  
128.63  
128.57  
128.47  
127.17  
121.09  
79.26  
68.70  
57.60  
43.55  
25.81

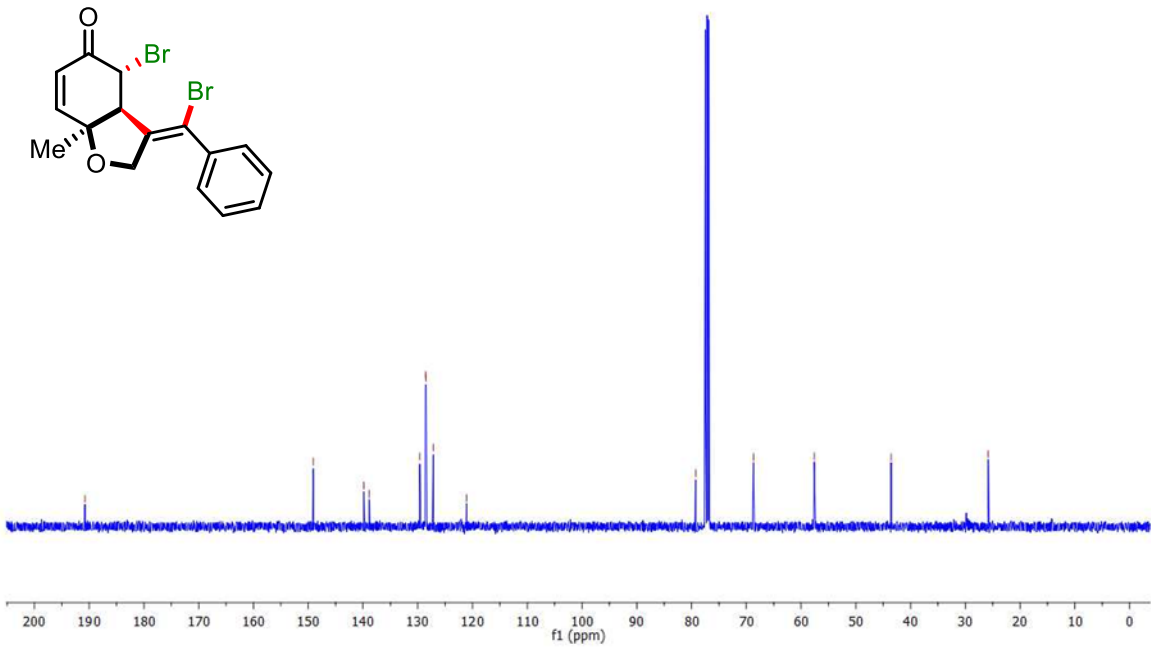

CMRV-AS-252-1H  
CMRV-AS-252-1H

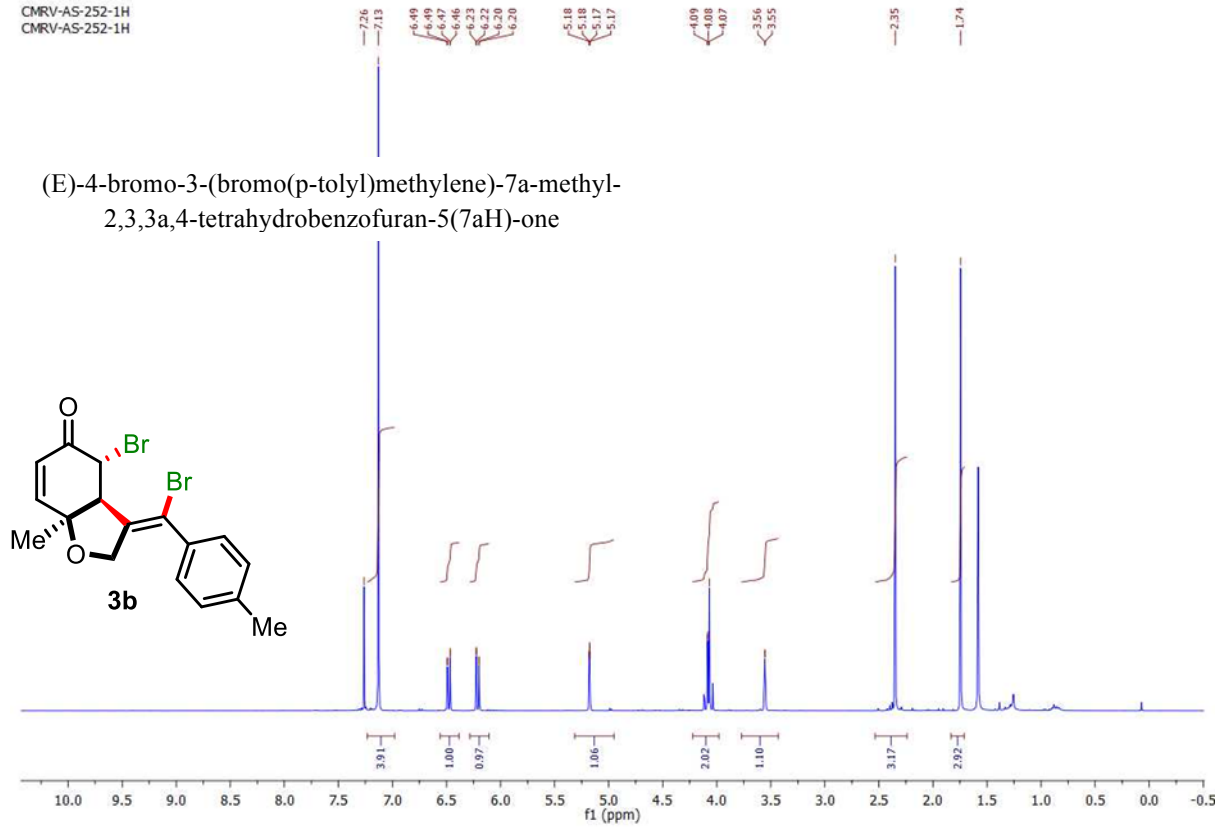

CMRV-AS-252-13C  
CMRV-AS-252-13C

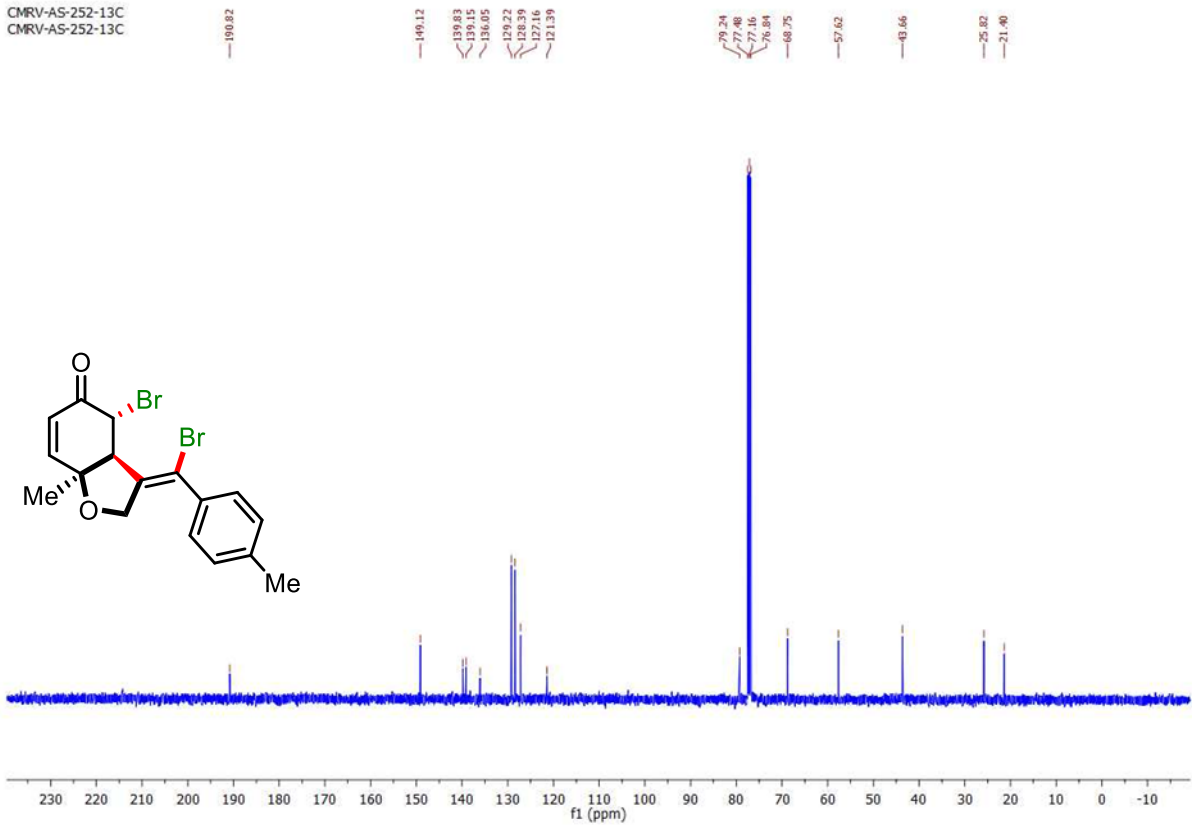



cmv-rs-701-1h  
cmv-rs-701-1h

6.95  
6.95  
6.49  
6.49  
6.46  
6.46  
6.23  
6.23  
6.21  
6.20  
5.18  
5.18  
5.17  
4.07  
4.06  
3.55  
3.55  
3.54  
2.29  
2.29

(E)-4-bromo-3-(bromo(3,5-dimethylphenyl)methylene)-7a-methyl-  
2,3,3a,4-tetrahydrobenzofuran-5(7aH)-one

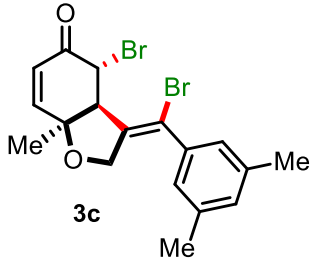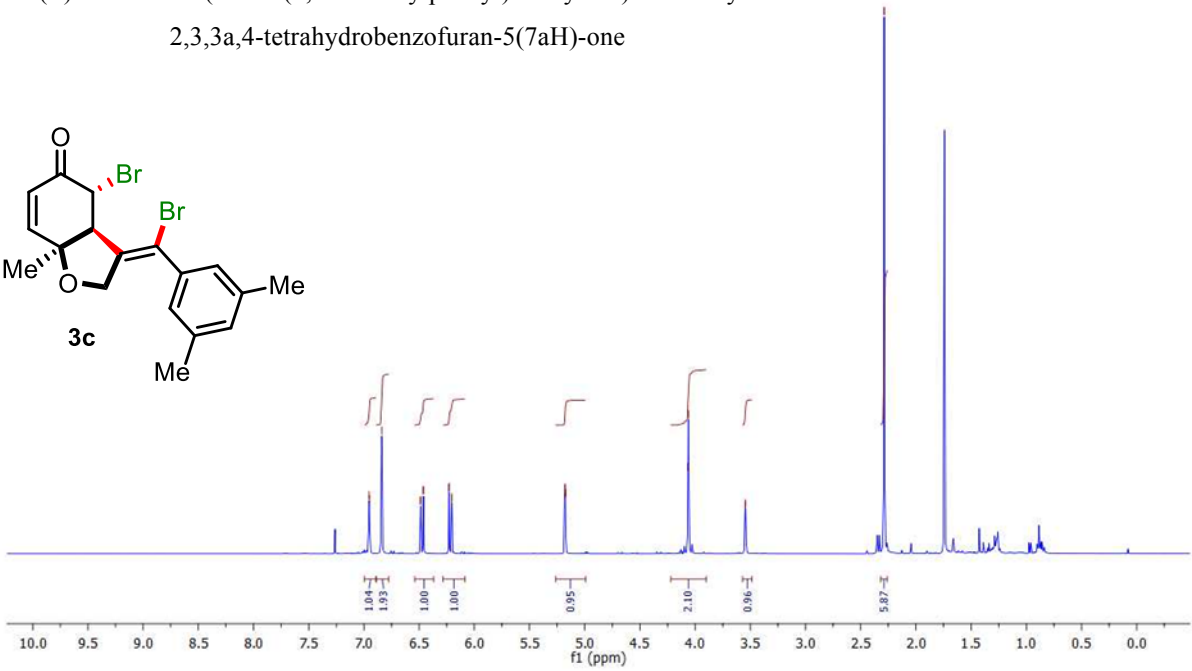

cmv-rs-701-13c  
cmv-rs-701-13c

190.79  
149.08  
138.24  
138.77  
138.18  
131.26  
127.10  
127.10  
121.40  
79.18  
68.70  
57.47  
43.05  
25.79  
21.28

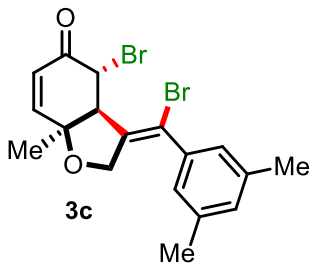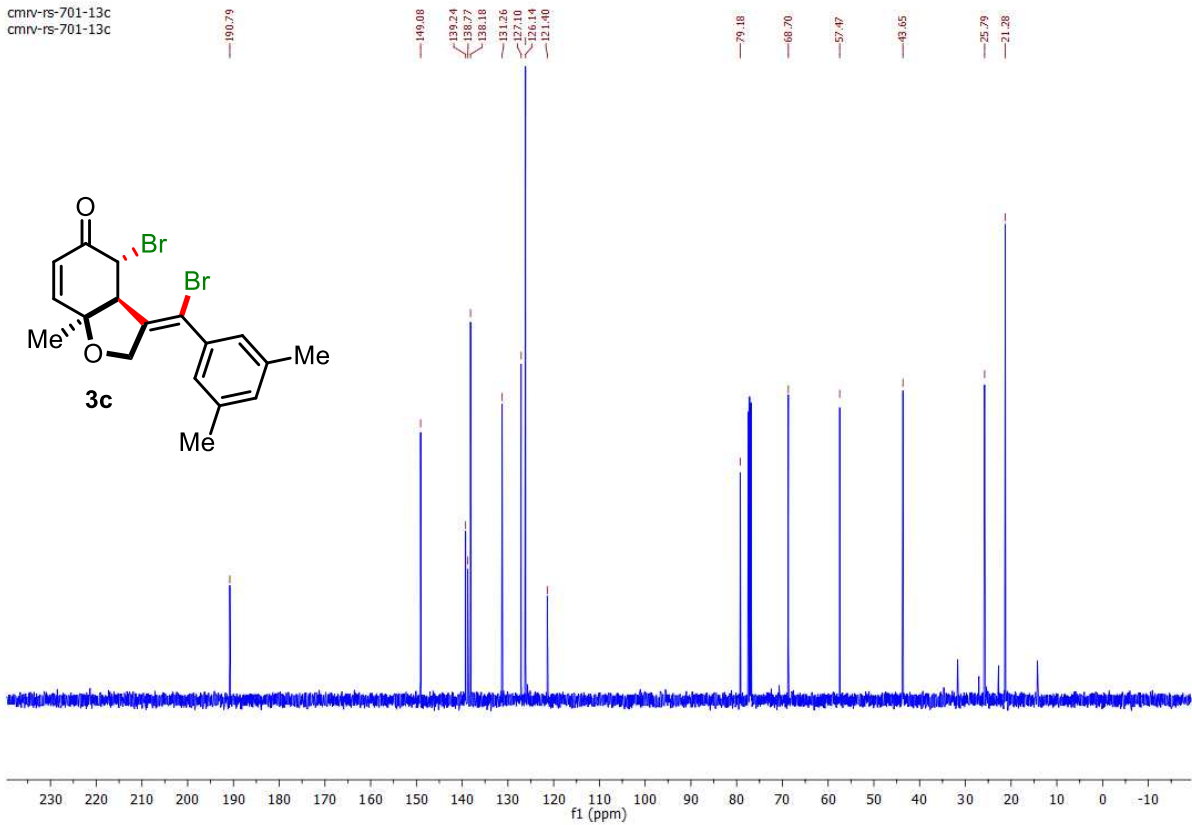

CMRV-AS-250-1H  
CMRV-AS-250-1H

7.26  
7.19  
7.16  
6.85  
6.82  
6.49  
6.49  
6.47  
6.46  
6.22  
6.22  
6.20  
6.19  
5.17  
5.17  
5.16  
4.09  
4.08  
4.07  
3.83  
3.81  
3.55  
3.54

(E)-4-bromo-3-(bromo(4-methoxyphenyl)methylene)-7a-methyl-  
2,3,3a,4-tetrahydrobenzofuran-5(7aH)-one

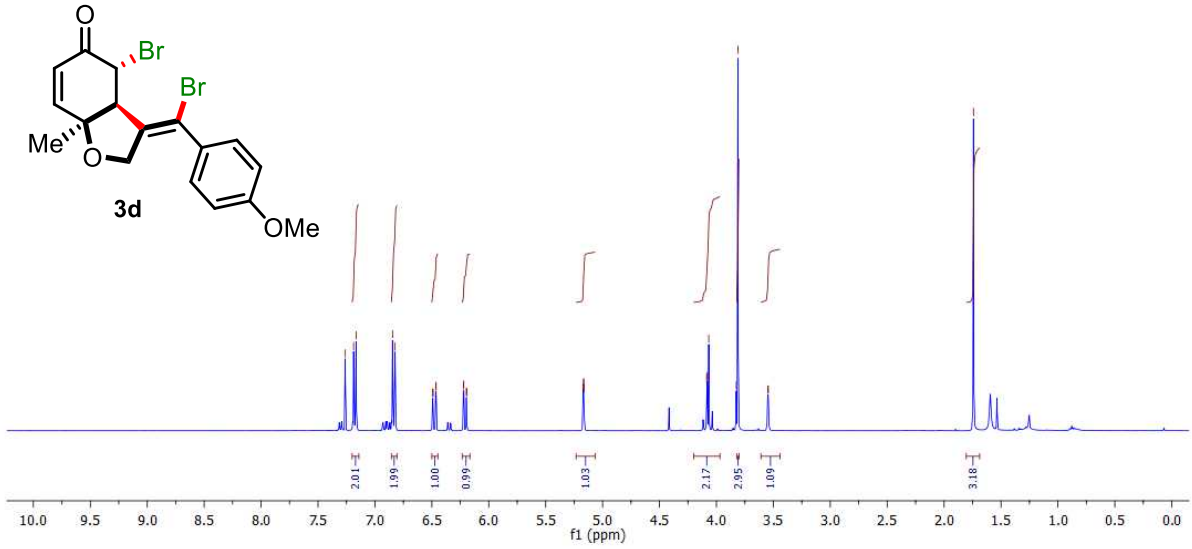

CMRV-AS-250-13C  
CMRV-AS-250-13C

166.47  
146.12  
138.52  
131.25  
130.54  
129.96  
127.14  
113.84  
79.24  
77.48  
77.16  
76.84  
68.76  
57.63  
55.52  
43.72  
25.80

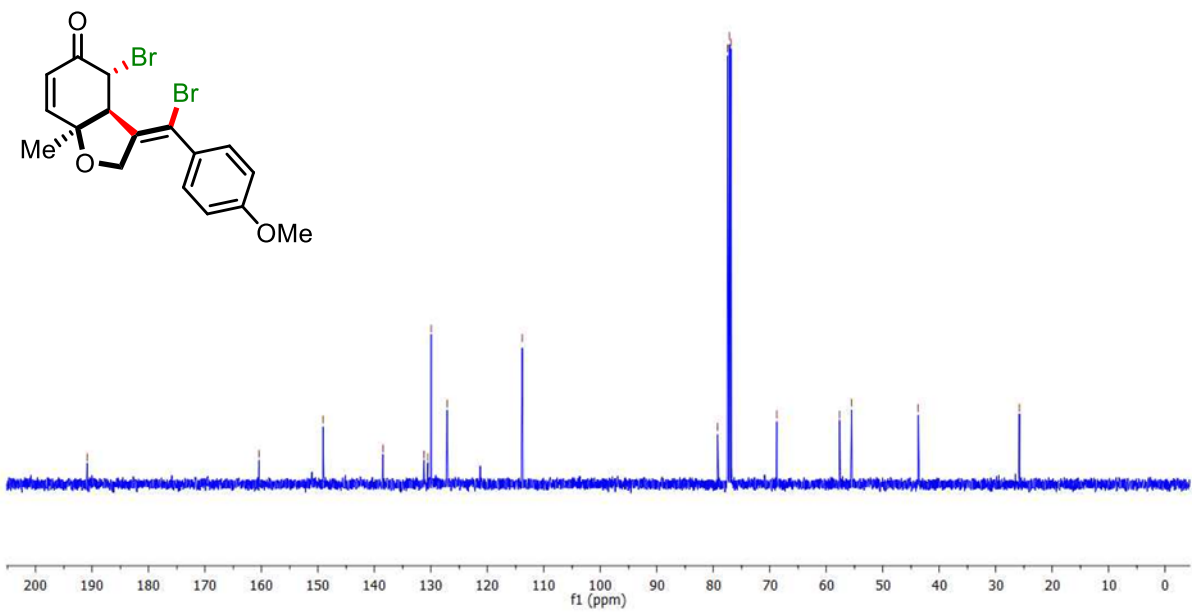

CMRV-AS-209-B-1H  
CMRV-AS-209-B-1H

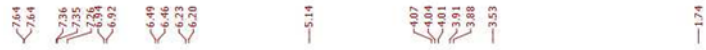

(E)-methyl 4-(bromo(4-bromo-7a-methyl-5-oxo-4,5-dihydrobenzofuran-3(2H,3aH,7aH)-ylidene)methyl)-2-methoxybenzoate

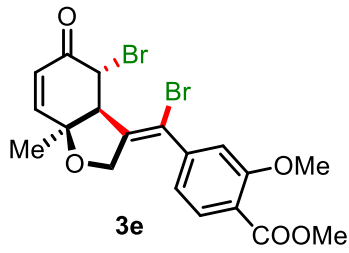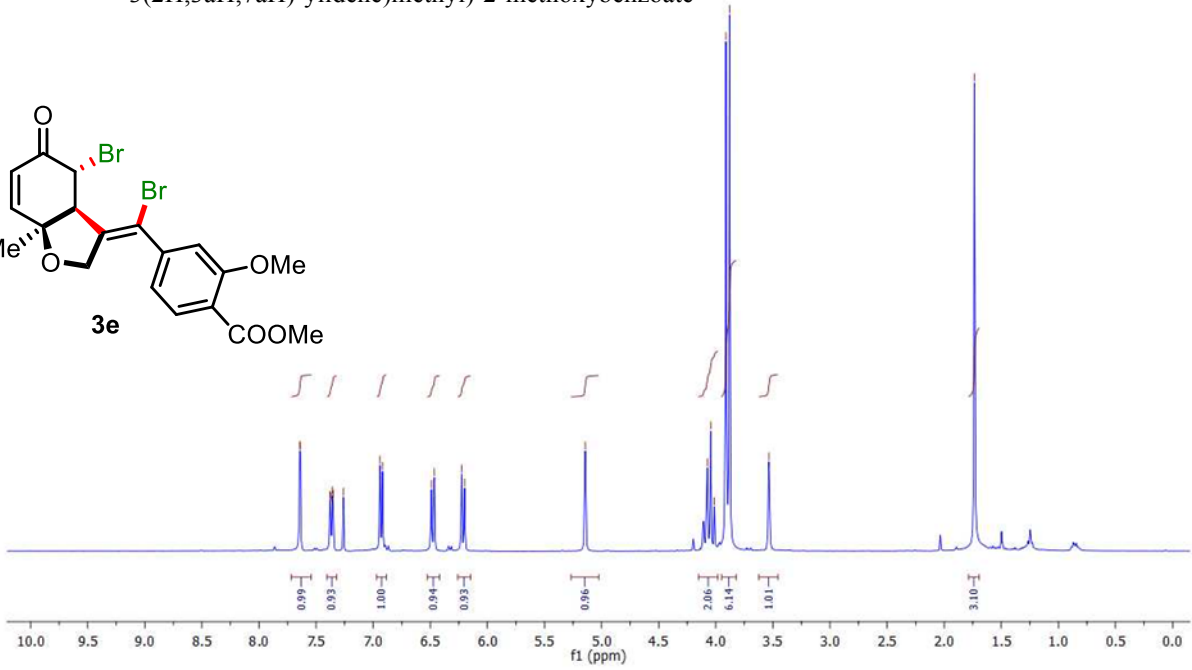

CMRV-AS-209-B-13C  
CMRV-AS-209-B-13C

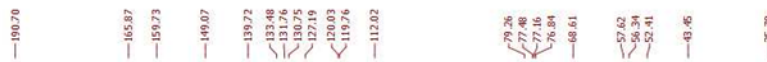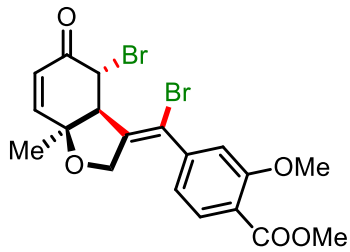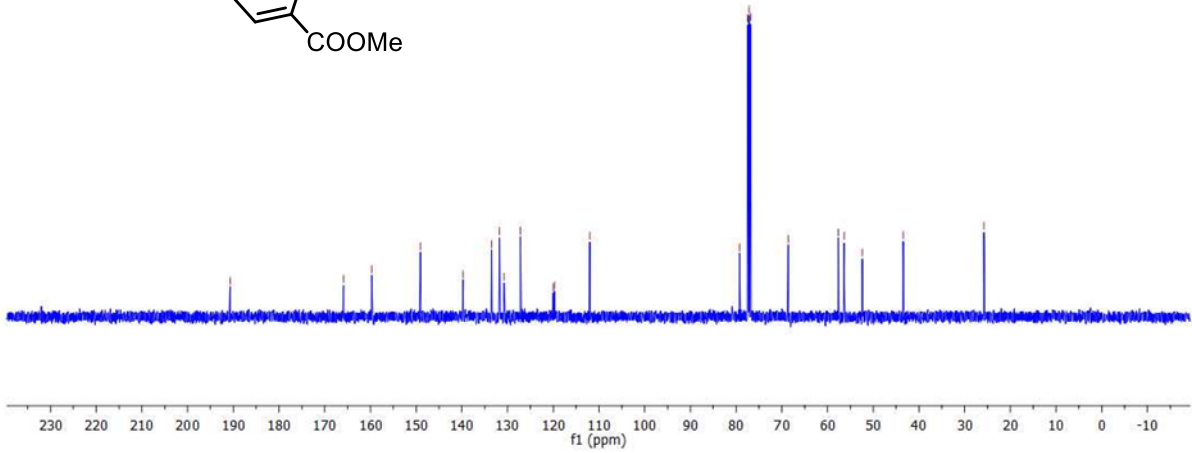

CMRV-AS-210-B-1H  
CMRV-AS-210-B-1H

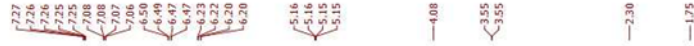

4-((E)-bromo-4-bromo-7a-methyl-5-oxo-4,5-dihydrobenzofuran-3(2H,3aH,7aH)-ylidene)methyl)phenyl acetate

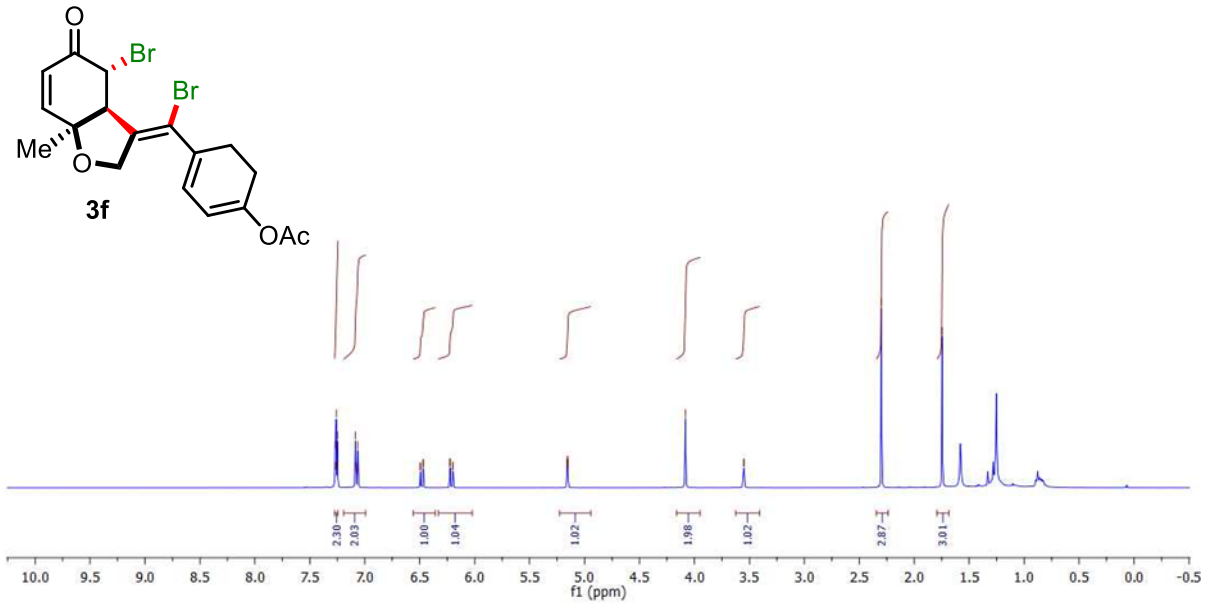

CMRV-AS-210-B-13C  
CMRV-AS-210-B-13C

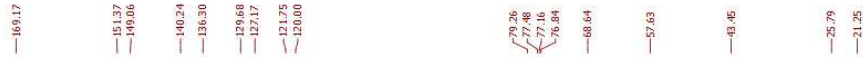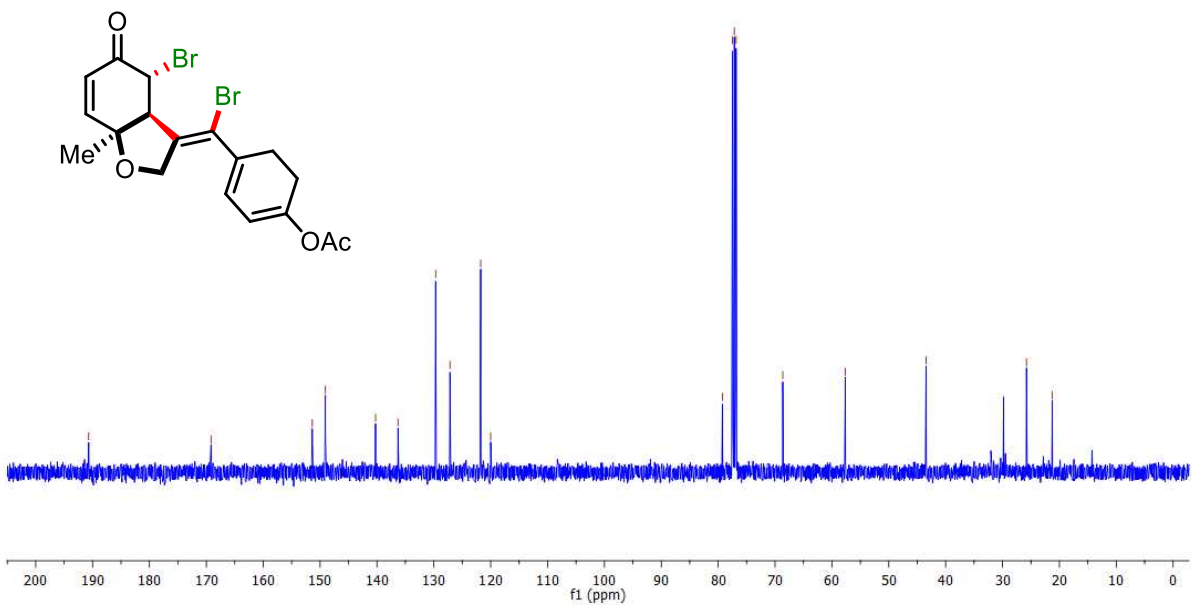

CMRV-AS-535-1H  
CMRV-AS-535-1H

7.736  
7.735  
7.734  
7.734  
7.723  
7.723  
7.722  
7.721  
7.704  
7.702  
7.699  
7.699  
6.849  
6.847  
6.846  
6.823  
6.822  
6.820  
6.820  
5.115  
5.115  
5.115  
4.110  
4.099  
4.086  
4.086  
4.084  
4.081  
3.584  
3.584

(E)-4-bromo-3-(bromo(4-fluorophenyl)methylene)-7a-methyl-2,3,3a,4-tetrahydrobenzofuran-5(7aH)-one

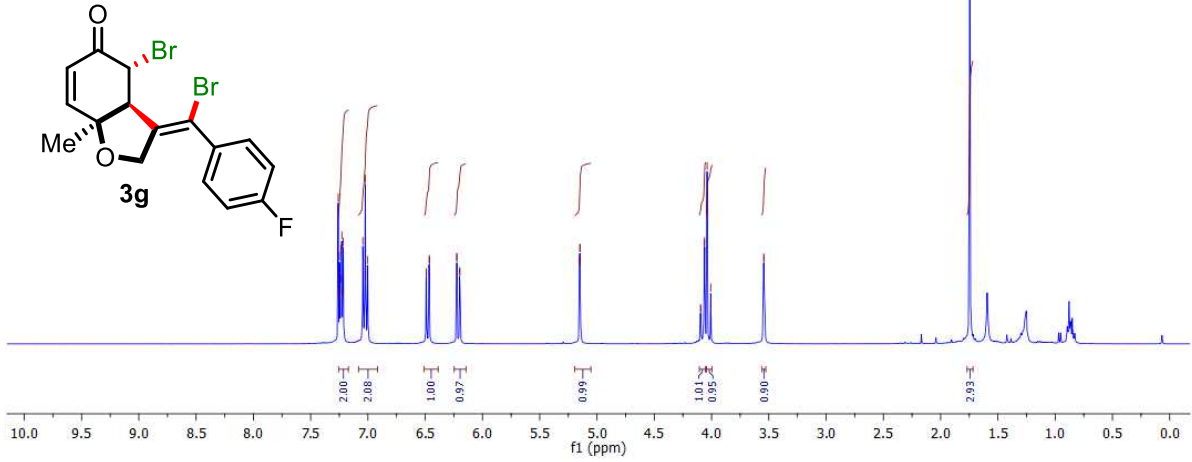

CMRV-AS-535-13C  
CMRV-AS-535-13C

190.53  
164.25  
161.76  
148.86  
140.00  
134.85  
130.34  
130.26  
127.07  
118.66  
115.66  
115.44  
79.21  
68.47  
57.46  
43.29  
25.67

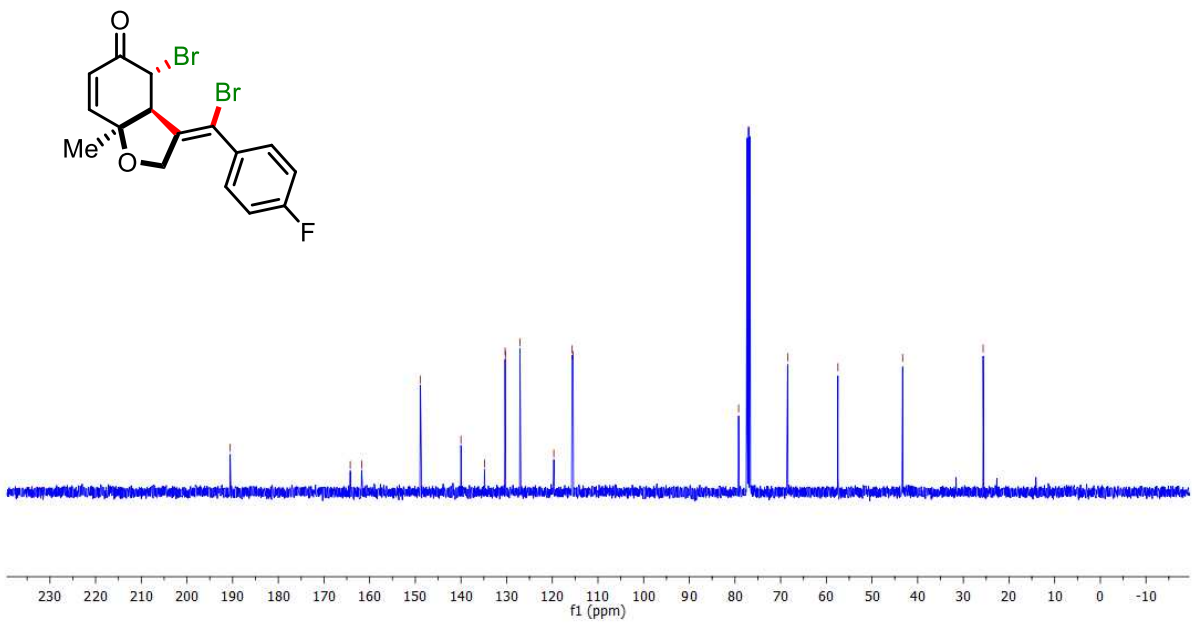

CMRV-AS-257-1RE  
CMRV-AS-257-1HRE

7.32  
7.31  
7.26  
7.19  
7.17  
6.49  
6.47  
6.23  
6.20  
5.14  
4.10  
4.09  
4.07  
4.05  
4.02  
3.85  
3.84  
1.75

(E)-4-bromo-3-(bromo(4-chlorophenyl)methylene)-7a-methyl-2,3,3a,4-tetrahydrobenzofuran-5(7aH)-one

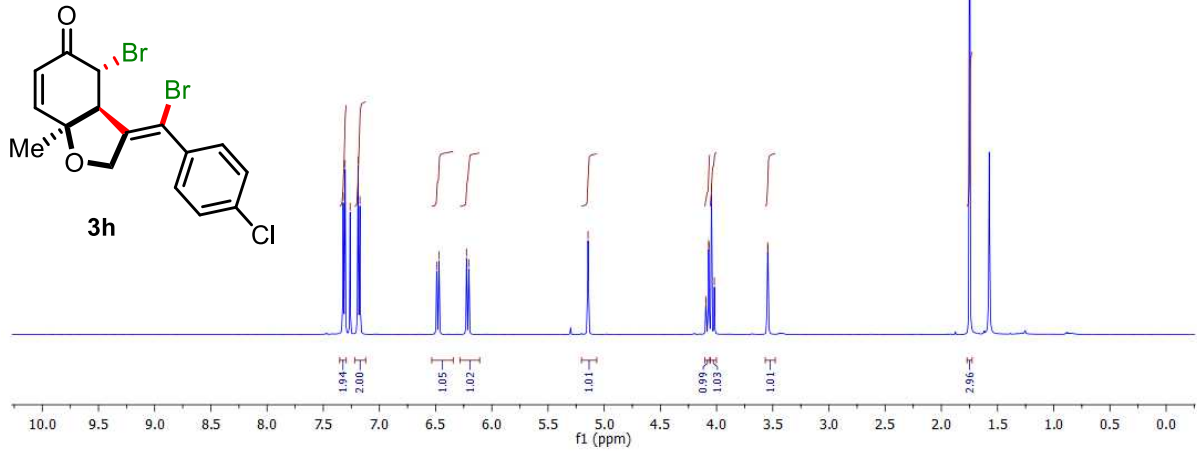

CMRV-AS-257-13C  
CMRV-AS-257-13C

148.99  
146.61  
132.27  
135.66  
128.79  
128.86  
127.23  
119.65  
79.34  
77.41  
76.91  
68.60  
57.65  
43.34  
25.81

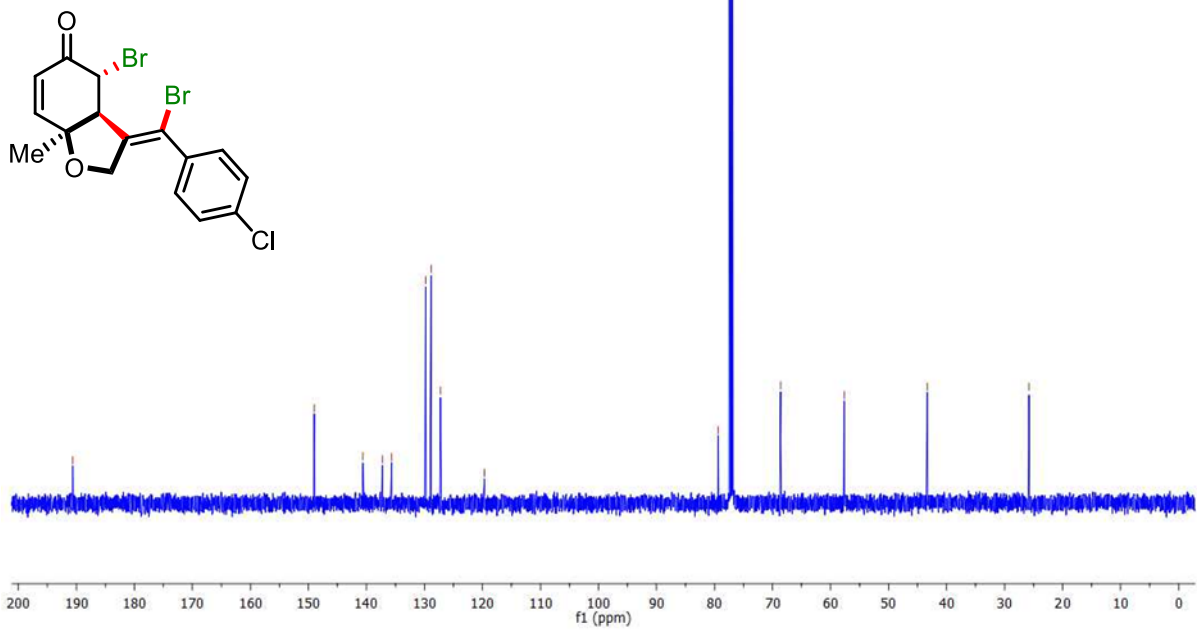

CMRV-AS-538-1H  
CMRV-AS-538-1H

7.47  
7.46  
7.13  
7.10  
6.49  
6.49  
6.47  
6.46  
6.32  
6.22  
6.20  
6.20  
5.14  
5.14  
5.13  
5.13  
4.06  
4.06  
4.04  
4.01  
3.53  
3.53  
1.74

(E)-4-bromo-3-(bromo(4-bromophenyl)methylene)-7a-methyl-2,3,3a,4-tetrahydrobenzofuran-5(7aH)-one

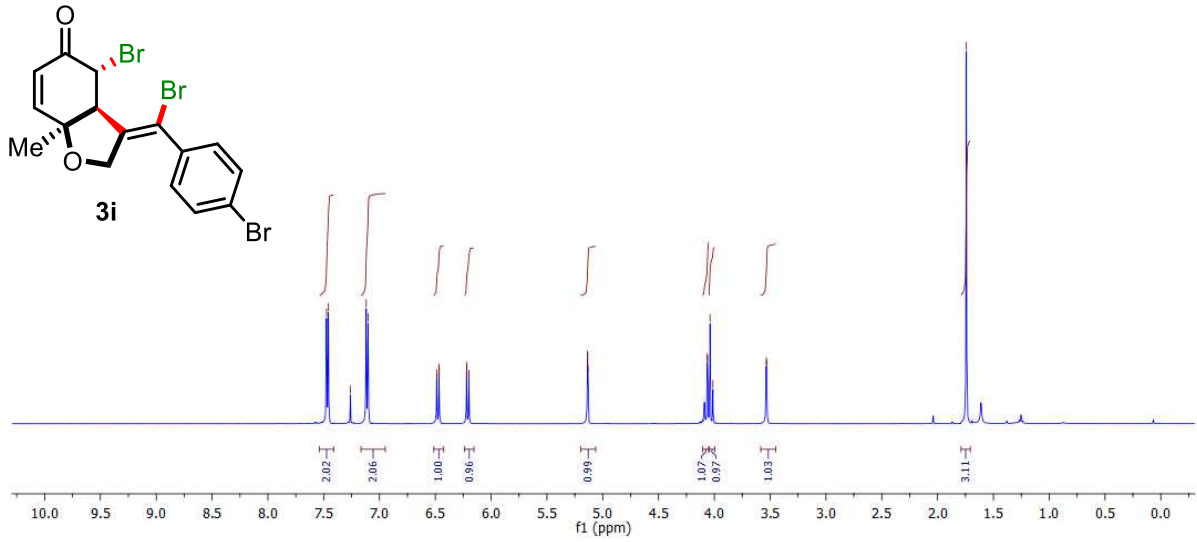

CMRV-AS-538-13C  
CMRV-AS-538-13C

190.59  
148.97  
140.63  
137.70  
131.80  
129.99  
127.81  
127.65  
119.65  
79.31  
77.41  
77.16  
76.91  
68.56  
57.63  
41.28  
25.78

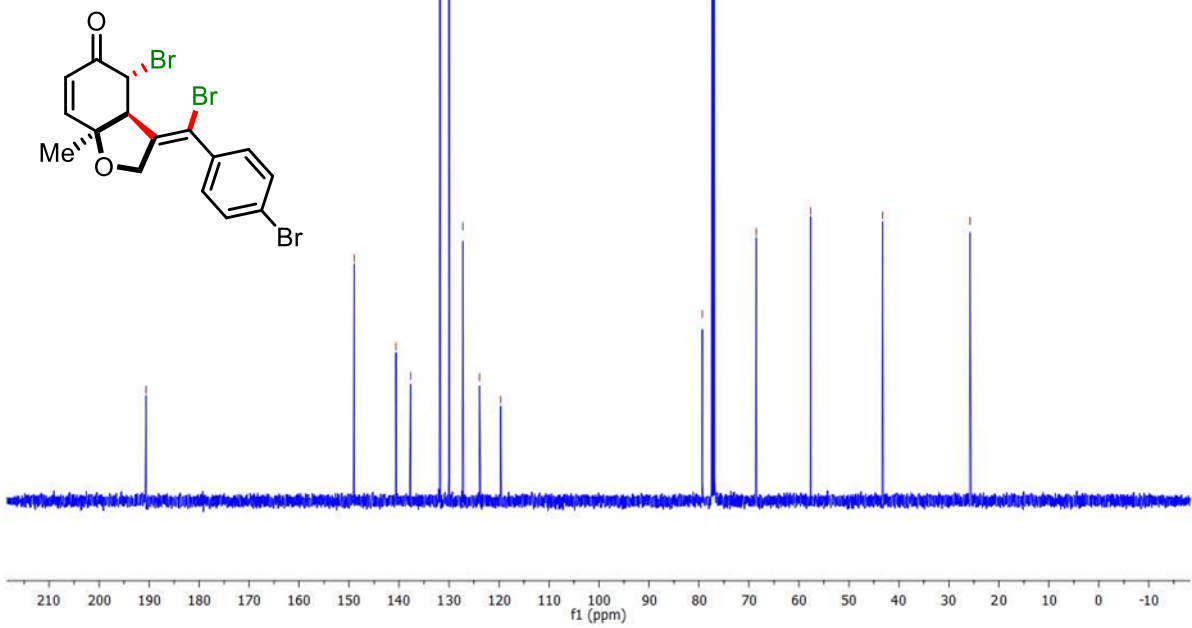

CMRV-AS-254-1H  
CMRV-AS-254-1H

7.59  
7.51  
7.48  
7.42  
7.26

6.50  
6.48  
6.25  
6.22

5.15  
5.15

4.11  
4.09  
4.03  
4.01

3.57

1.76  
1.73

(E)-4-bromo-3-(bromo(3-(trifluoromethyl)phenyl)methylene)-7a-methyl-2,3,3a,4-tetrahydrobenzofuran-5(7aH)-one

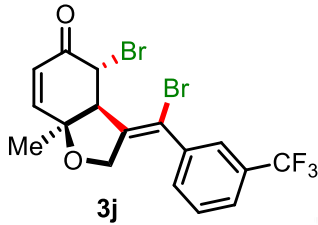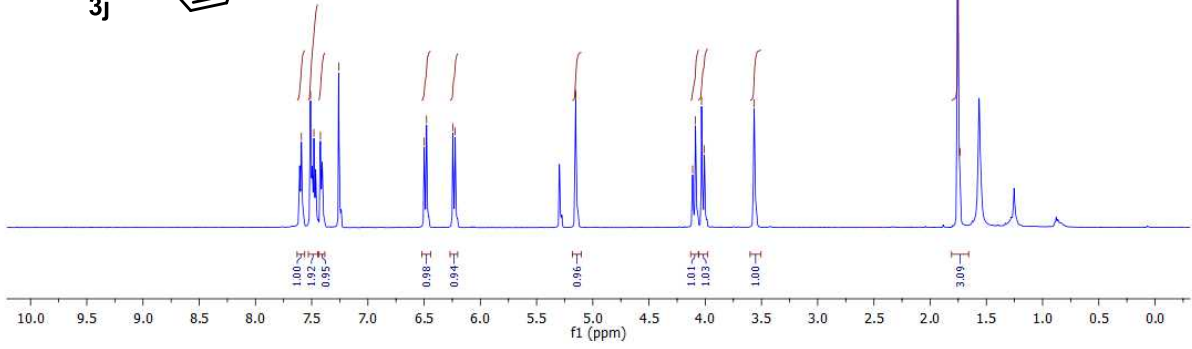

CMRV-AS-254-13C  
CMRV-AS-254-13C

173.72

148.95

141.71

140.95

137.61

133.71

129.27

127.34

126.34

125.30

84.23

79.40

77.41

77.16

76.91

68.48

57.70

48.32

43.19

25.82

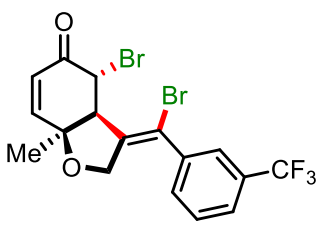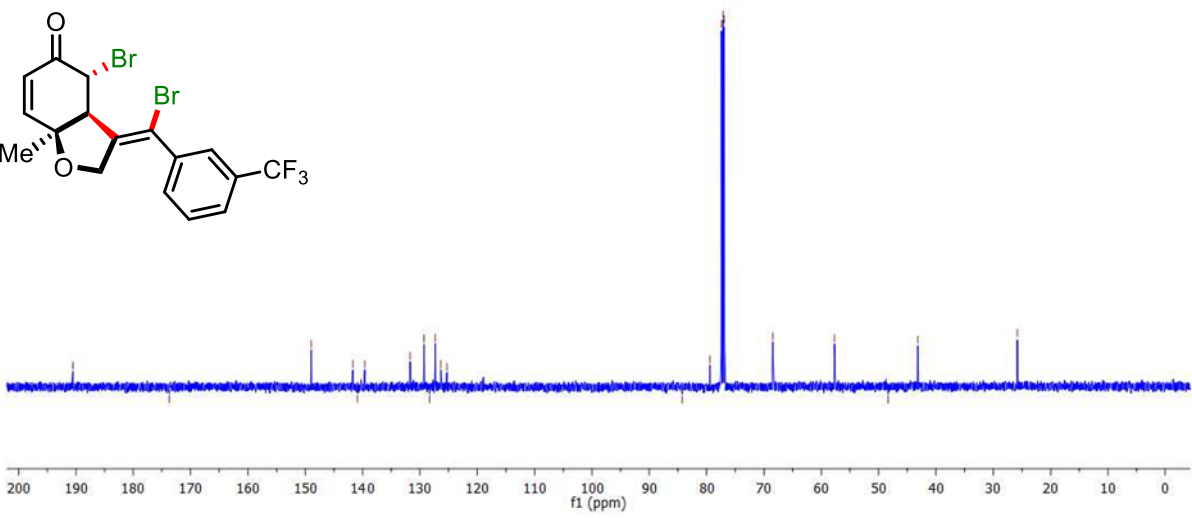



CMRV-AS-247-1H  
CMRV-AS-247-1H

7.92  
7.92  
7.91  
7.90  
7.35  
7.35  
7.33  
7.33  
7.26  
6.50  
6.50  
6.48  
6.47  
6.24  
6.24  
6.21  
6.21  
5.15  
5.15  
5.15  
4.13  
4.13  
4.08  
4.08  
4.05  
4.05  
3.57  
3.57  
3.56  
3.56  
2.60  
1.75

(E)-3-((4-acetylphenyl)bromomethylene)-4-bromo-7a-methyl-2,3,3a,4-tetrahydrobenzofuran-5(7aH)-one

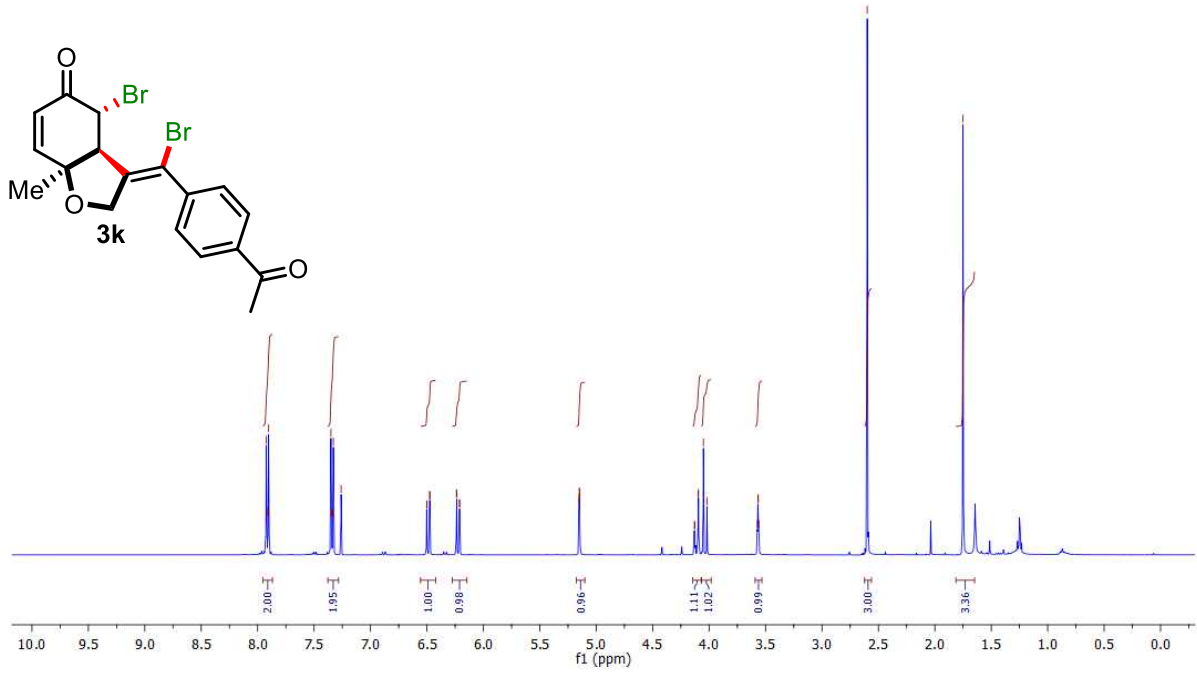

CMRV-AS-247-13C  
CMRV-AS-247-13C

148.96  
143.01  
141.63  
137.64  
128.78  
128.53  
127.26  
119.53  
79.31  
77.48  
77.16  
76.84  
68.58  
57.72  
48.22  
26.81  
25.79

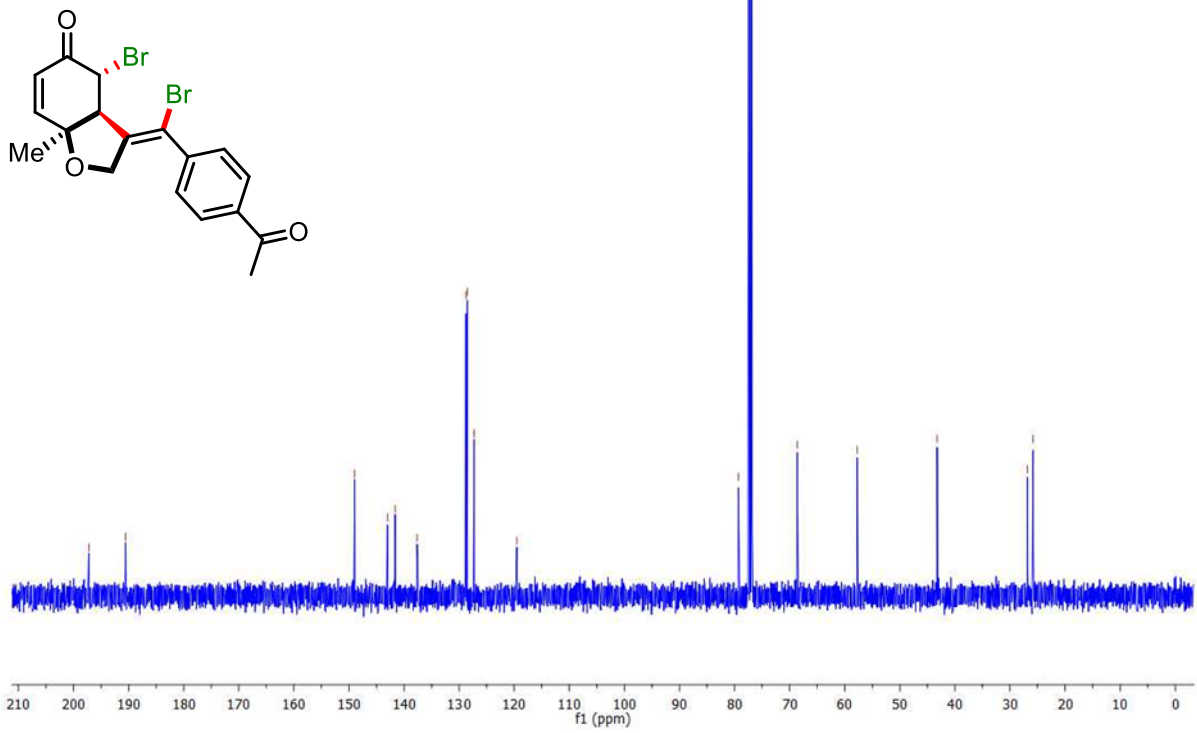

CMRV-AS-288-DOWN-1H-1  
CMRV-AS-288-DOWN-1H-1

8.32  
8.27  
8.21  
8.20  
7.45  
7.44  
7.43  
7.42  
7.26  
6.51  
6.51  
6.49  
6.48  
6.25  
6.25  
6.23  
6.23  
5.14  
5.13  
5.13  
5.13  
4.14  
4.14  
4.11  
4.10  
4.05  
4.02  
3.58  
3.58  
3.57  
3.57

1.77

(E)-4-bromo-3-(bromo(4-nitrophenyl)methylene)-7a-methyl-2,3,3a,4-tetrahydrobenzofuran-5(7aH)-one

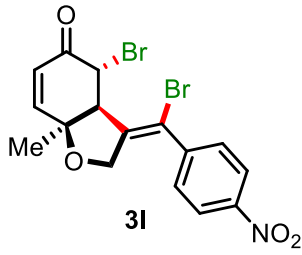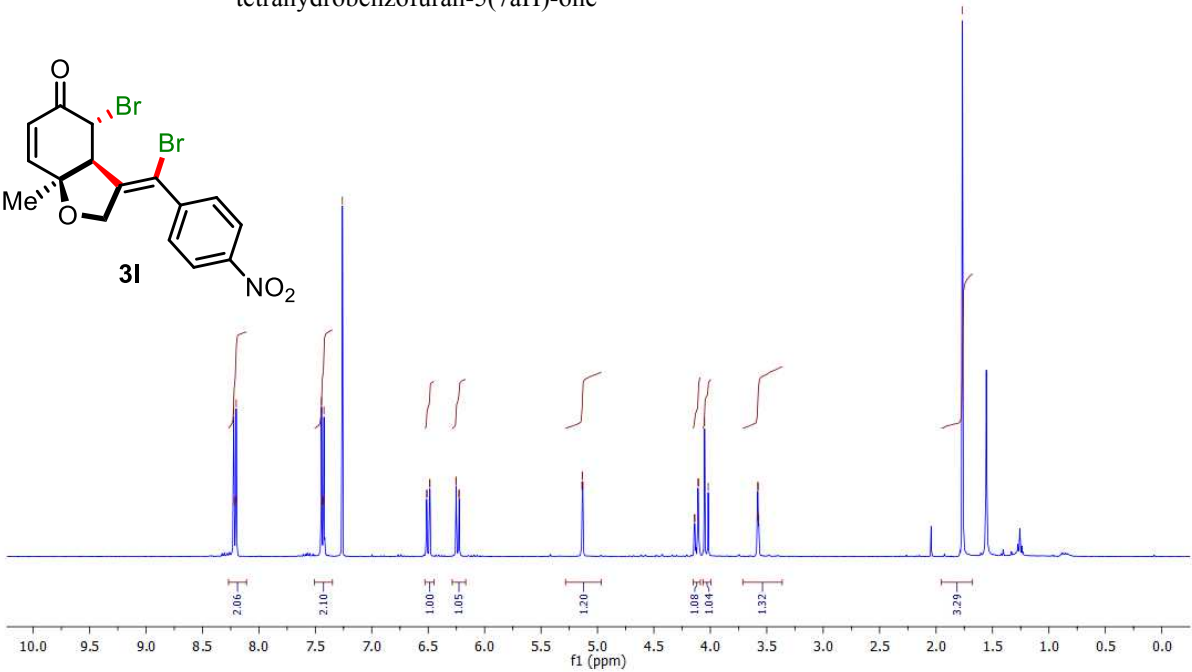

CMRV-AS-288-down-13C-1  
CMRV-AS-288-UP-13C-1

189.33  
148.66  
144.41  
142.86  
129.49  
127.13  
124.61  
114.58  
81.89  
77.88  
76.84  
72.66  
54.80  
42.36  
25.61

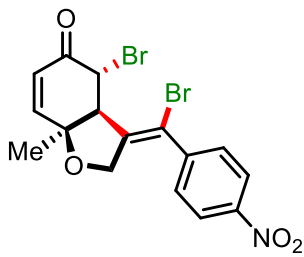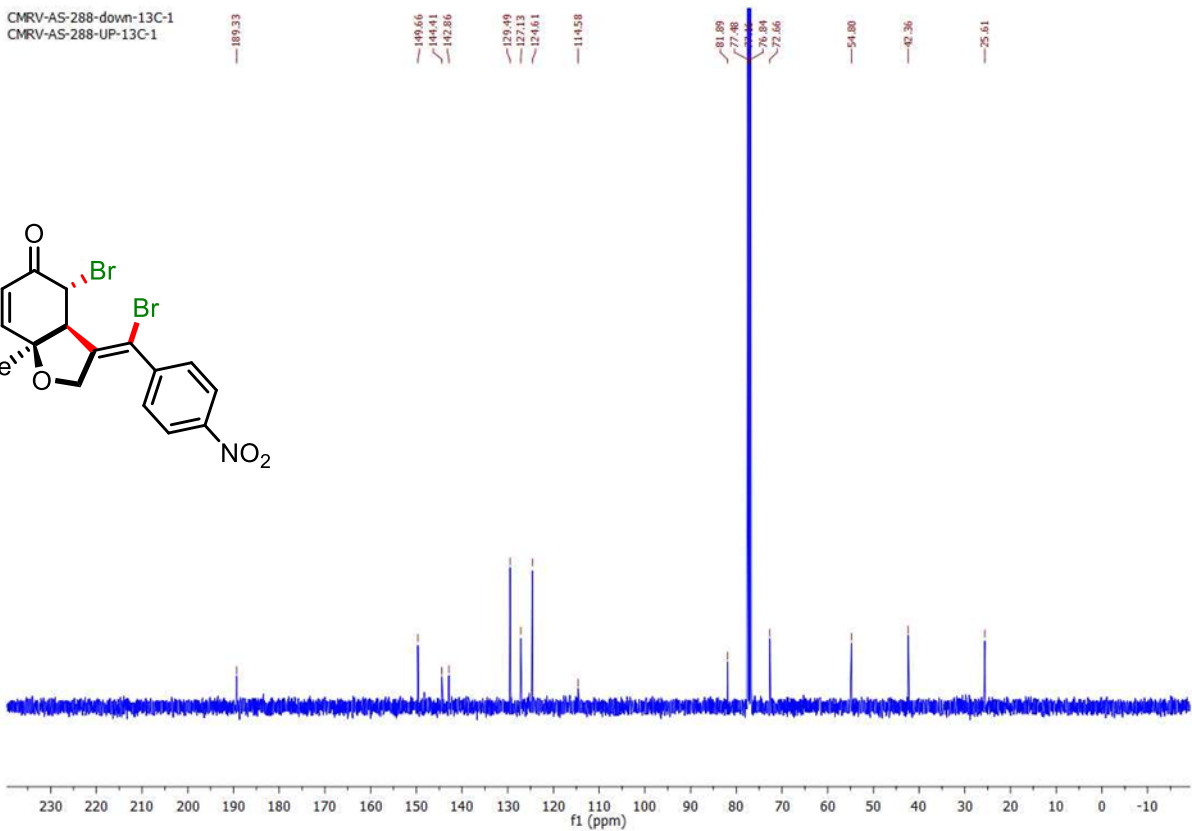

CMRV-AS-263-1H  
CMRV-AS-263-1H

7.45  
7.45  
7.44  
7.44  
7.26  
7.20  
7.20  
7.08  
7.08  
7.07  
6.53  
6.50  
6.50  
6.10  
6.08  
6.07  
4.57  
4.54  
4.19  
4.18  
4.12  
4.09

1.75

(E)-4-bromo-3-(bromo(thiophen-2-yl)methylene)-7a-methyl-  
2,3,3a,4-tetrahydrobenzofuran-5(7aH)-one

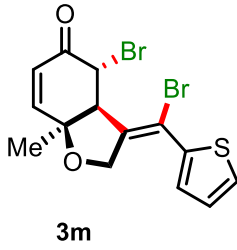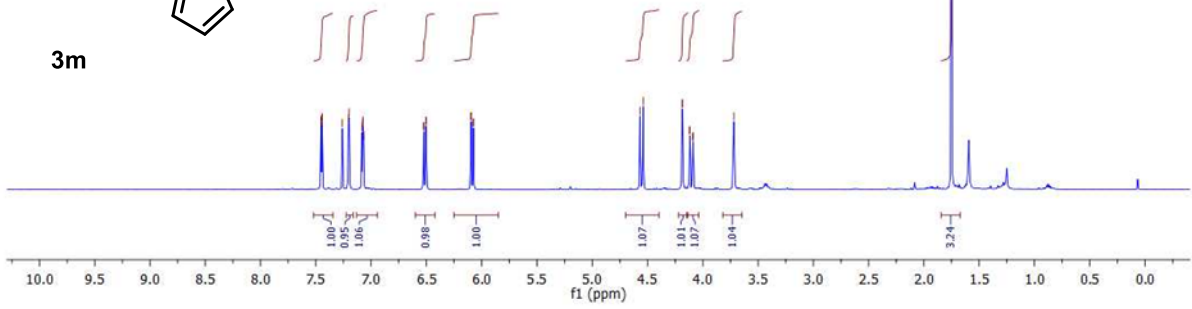

CMRV-AS-263-13C  
CMRV-AS-263-13C

189.86  
149.85  
141.31  
139.53  
128.46  
128.45  
127.71  
127.06  
109.98  
81.48  
72.54  
55.11  
42.23  
25.72

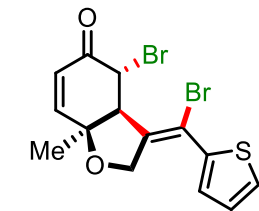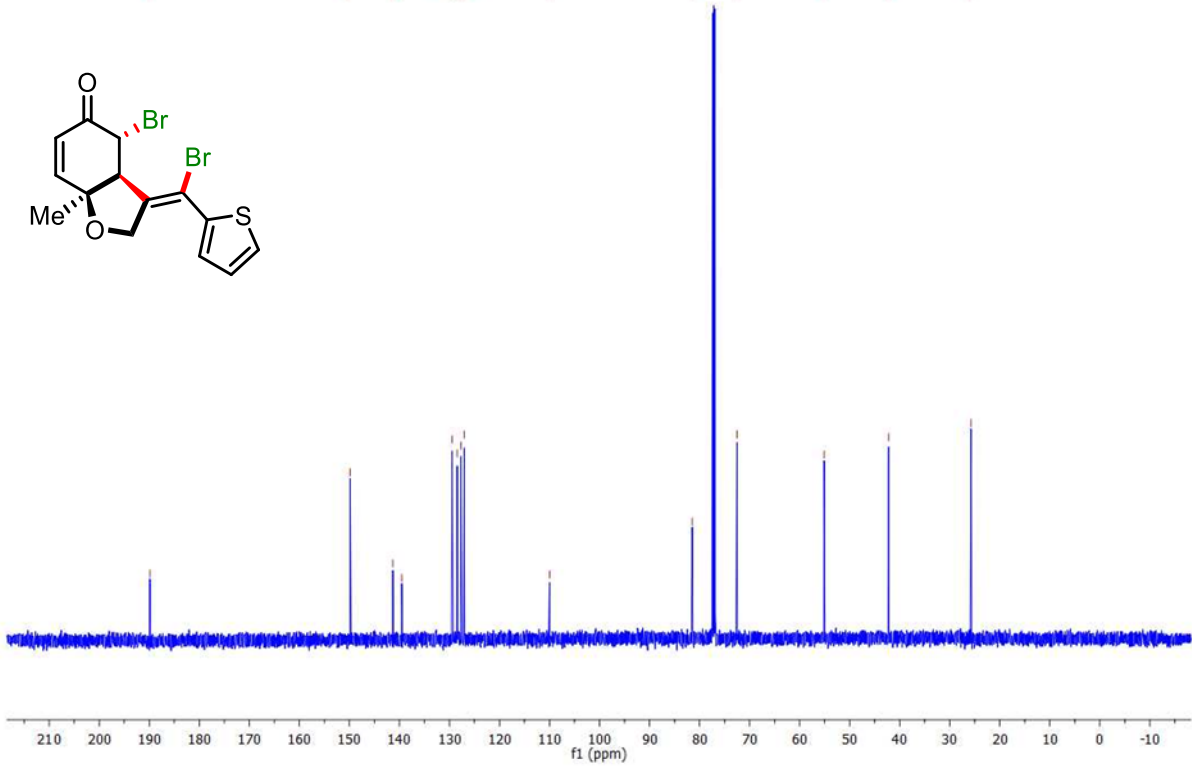

CMRV-AS-548-1H  
CMRV-AS-548-1H

7.26  
6.45  
6.45  
6.42  
6.42  
6.14  
6.14  
6.11  
6.11  
5.15  
5.14  
4.36  
4.33  
3.93  
3.90  
3.35  
2.38  
2.36  
2.34  
2.32  
1.71  
1.11  
1.09  
1.07

(3a*S*,4*R*,7a*S*,*E*)-4-bromo-3-(1-bromopropylidene)-7a-methyl-  
2,3,3a,4-tetrahydrobenzofuran-5(7a*H*)-one

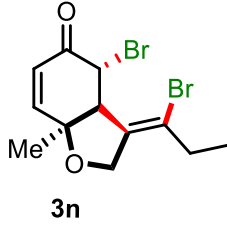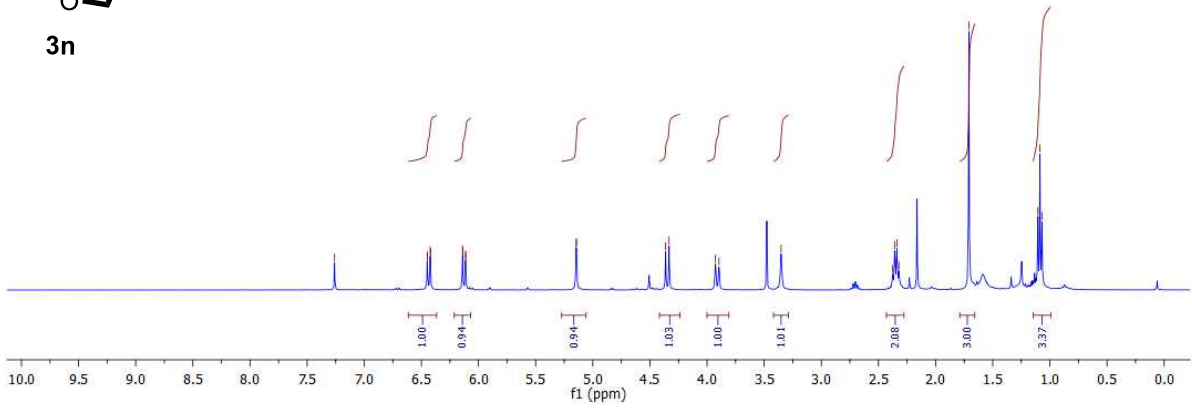

CMRV-AS-548-13G  
CMRV-AS-548-13G

198.61  
146.14  
136.31  
126.94  
125.99  
79.45  
77.48  
77.16  
76.84  
67.36  
56.48  
43.83  
32.98  
25.84  
13.02

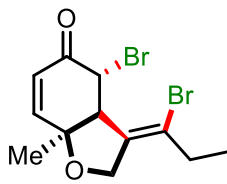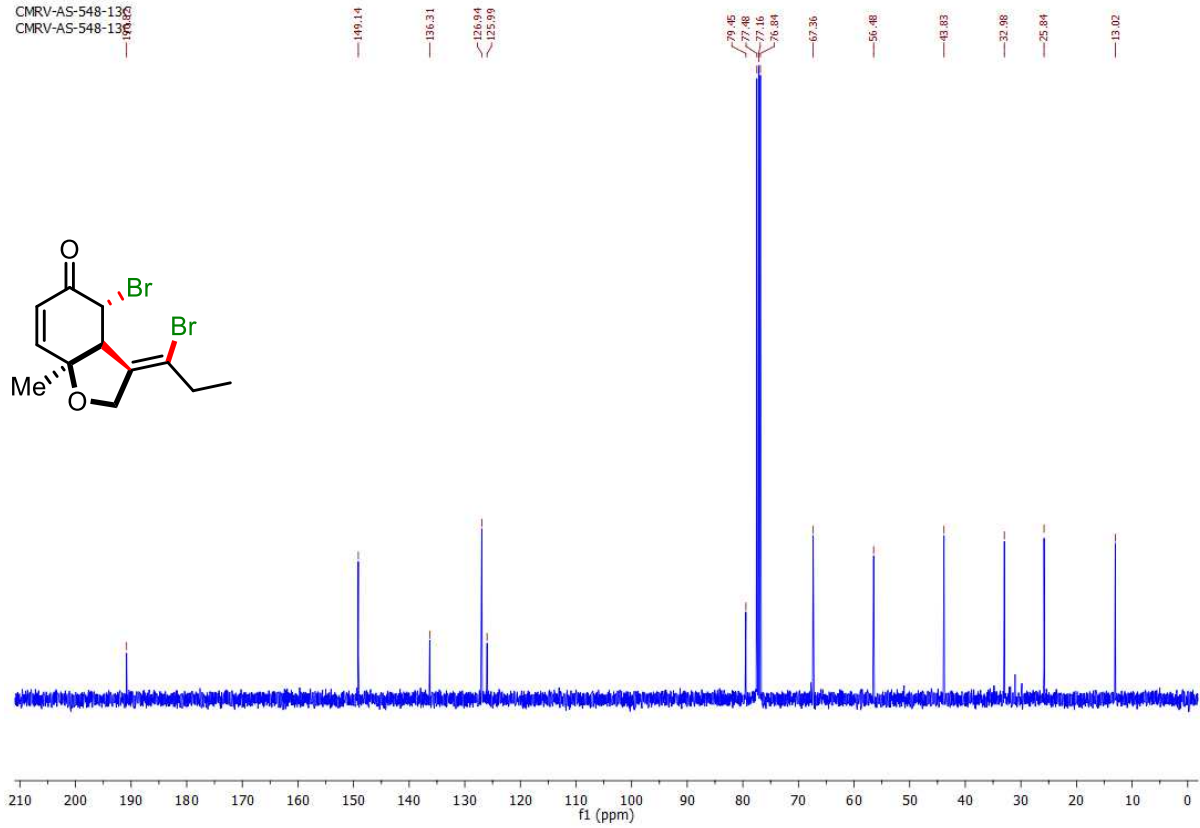

CMRV-as-273-1h  
CMRV-as-273-1h

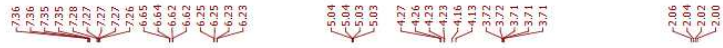

(E)-4-bromo-3-(bromo(phenyl)methylene)-7a-ethyl-2,3,3a,4-tetrahydrobenzofuran-5(7aH)-one

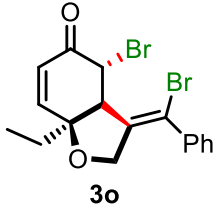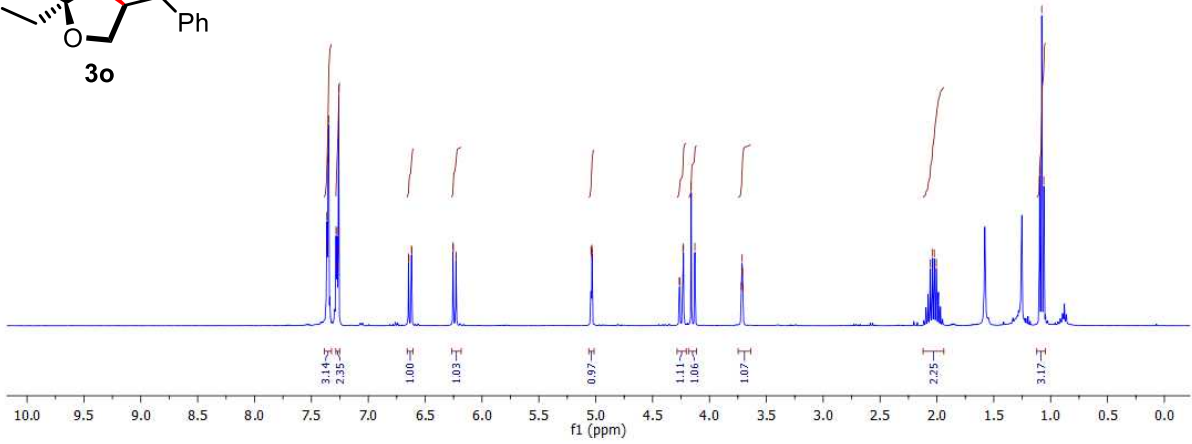

CMRV-AS-273-13C  
CMRV-AS-273-13C

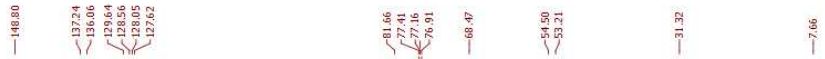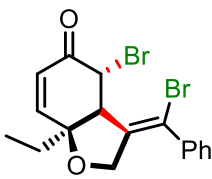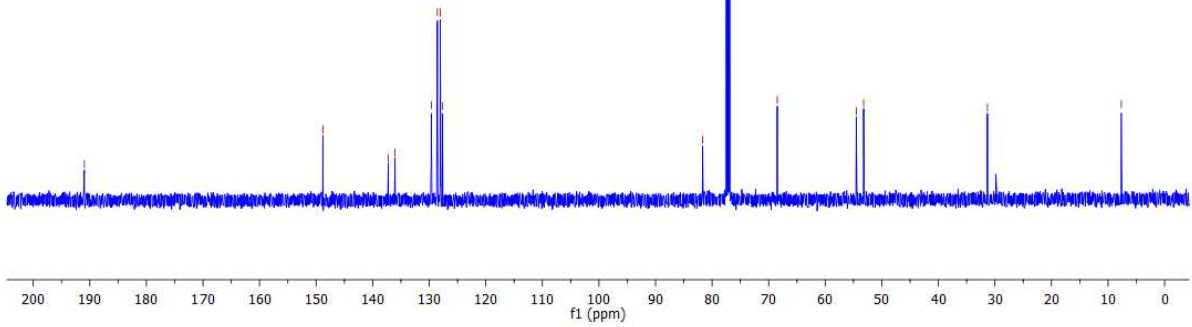

CMRV-AS-526-1H  
CMRV-AS-526-1H

7.40, 7.34, 7.33, 7.32, 7.26, 7.25, 7.24, 7.23, 7.23, 6.59, 6.58, 6.56, 6.56, 6.25, 6.24, 6.22, 6.22, 5.18, 5.17, 5.17, 4.12, 4.12, 4.09, 4.08, 4.08, 4.03, 3.66, 3.65, 2.06, 2.04, 2.02, 2.02, 2.00, 1.98, 1.62, 1.61, 1.59, 1.57, 1.00, 0.98, 0.97, 0.95

(3a*S*,4*R*,7a*S*,*E*)-4-bromo-3-(bromo(phenyl)methylene)-7a-propyl-  
2,3,3a,4-tetrahydrobenzofuran-5(7a*H*)-one

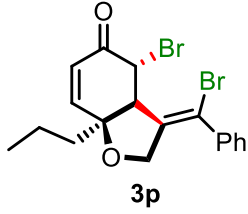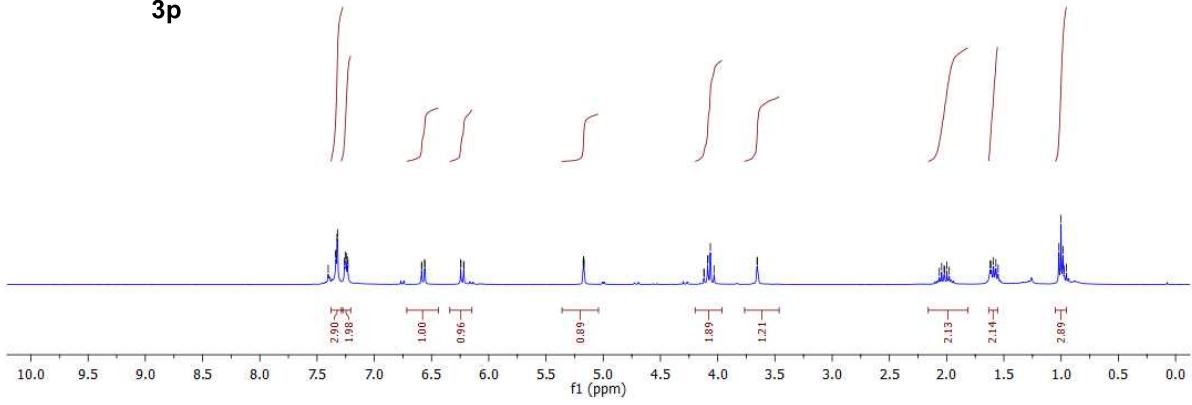

CMRV-AS-526-13C  
CMRV-AS-526-13C

191.01, 148.51, 140.02, 138.83, 129.56, 128.54, 128.48, 127.34, 126.91, 81.34, 77.48, 77.16, 76.84, 68.57, 55.37, 40.75, 40.66, 16.57, 14.58

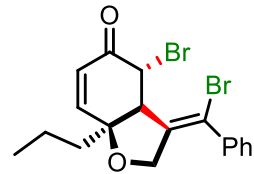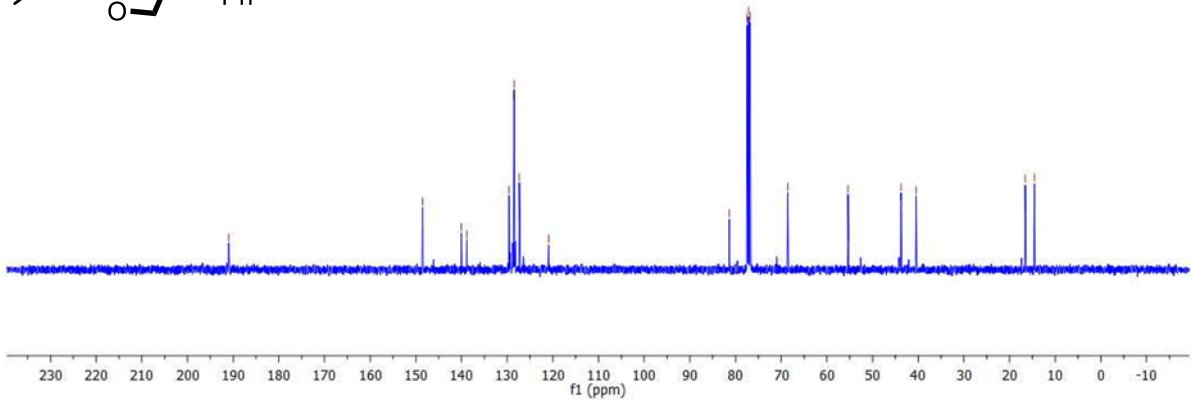

CMRV-AS-510-1H  
CMRV-AS-510-1H

(E)-7a-benzyl-4-bromo-3-(bromo(phenyl)methylene)-2,3,3a,4-tetrahydrobenzofuran-5(7aH)-one

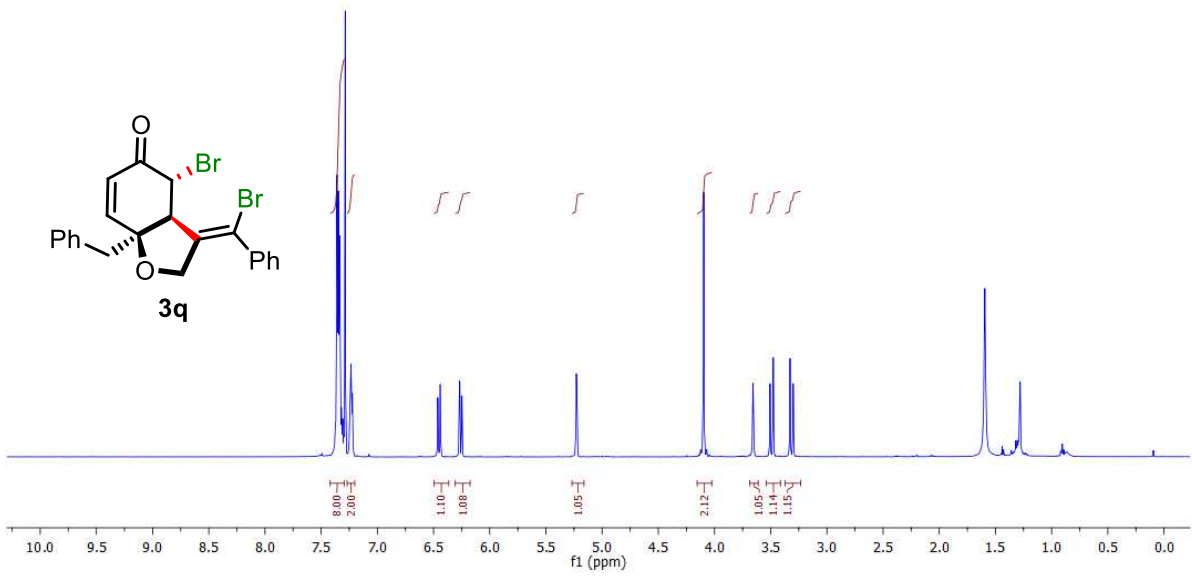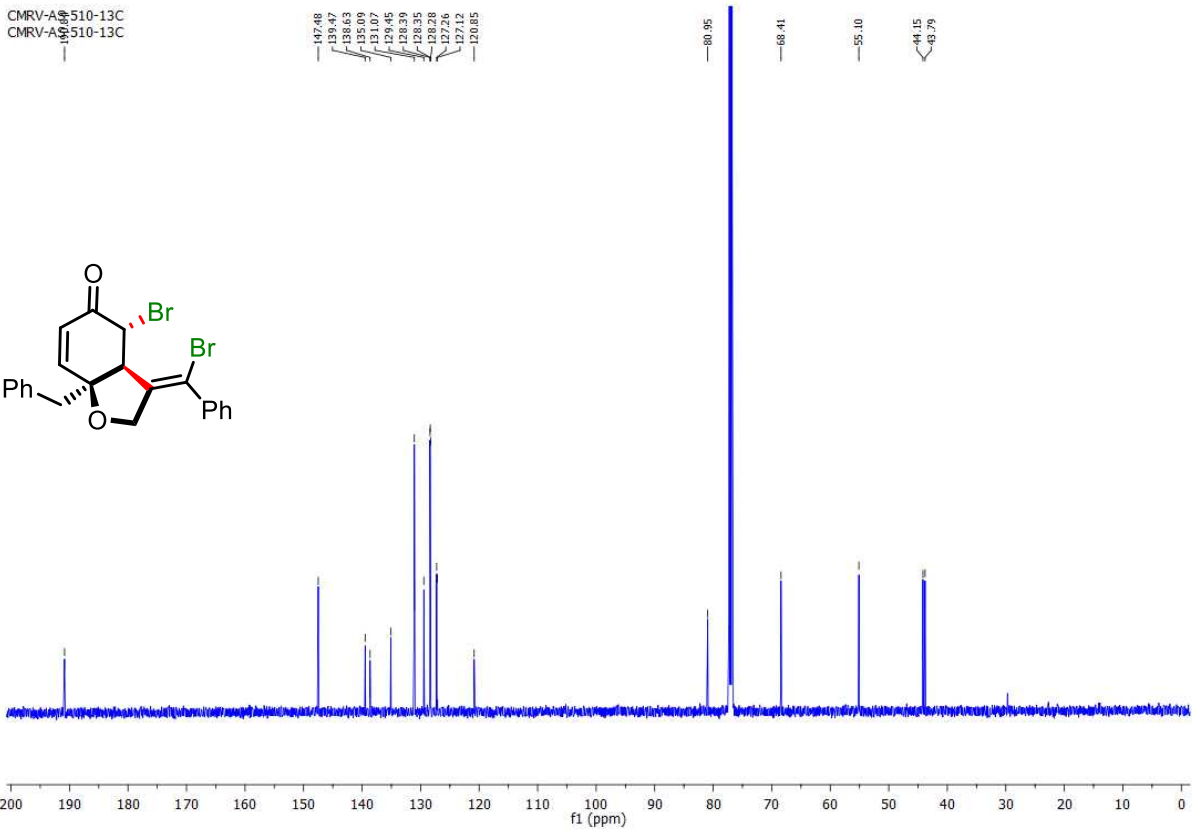

CMRV-AS-286-A-1H  
CMRV-AS-286-A-1H

7.34, 7.33, 7.33, 7.33, 7.32, 7.26, 7.25, 7.24, 7.24, 7.23, 7.23, 6.66, 6.65, 6.63, 6.24, 6.24, 6.21, 6.21, 5.17, 5.16, 5.16, 4.10, 4.10, 4.08, 3.66, 3.66, 3.36, 2.45, 2.44, 2.44, 2.42, 2.40, 2.40, 2.39, 2.32, 2.30, 2.29, 2.28, 2.26, 2.25

(E)-4-bromo-3-(bromo(phenyl)methylene)-7a-(2-methoxyethyl)-  
2,3,3a,4-tetrahydrobenzofuran-5(7aH)-one

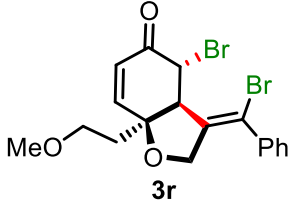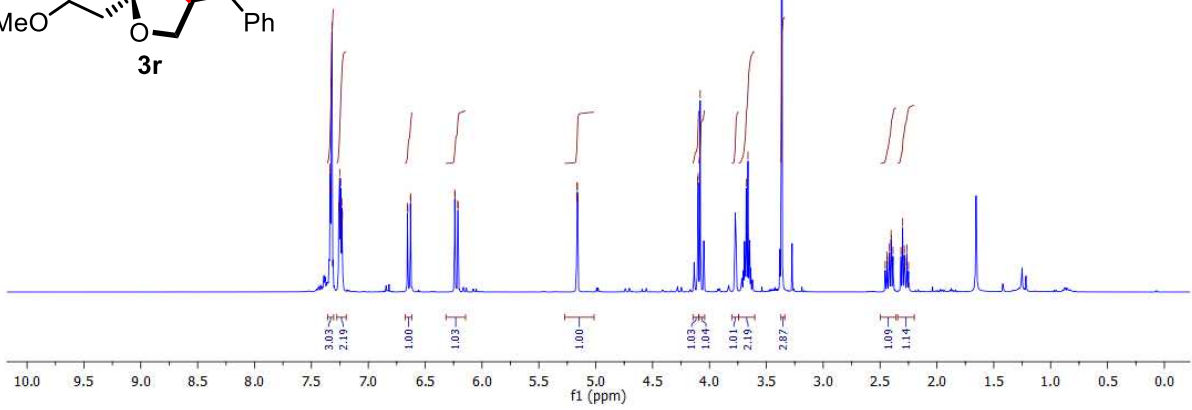

CMRV-AS-286-A-13C-2  
CMRV-AS-286-A-13C-2

148.15, 139.66, 138.80, 129.59, 128.54, 128.47, 127.18, 120.97

80.36, 77.48, 77.16, 76.84, 69.61, 69.67, 58.76, 56.30, 43.65, 38.18

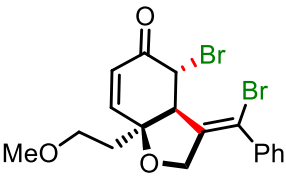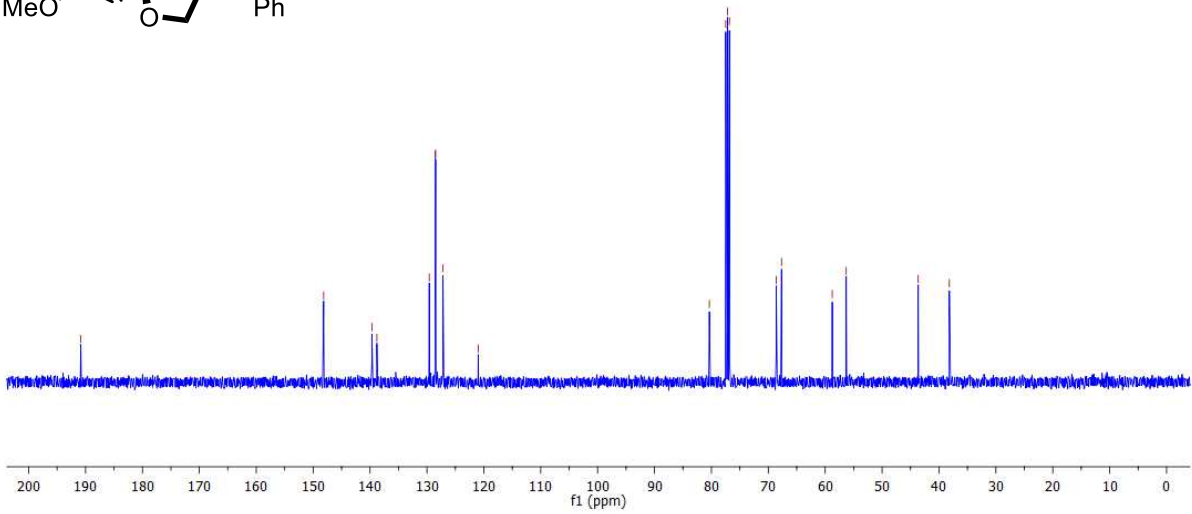



CMRV-AS-279-1H  
CMRV-AS-279-1H

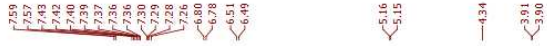

(E)-4-bromo-3-(bromo(phenyl)methylene)-7a-phenyl-2,3,3a,4-tetrahydrobenzofuran-5(7aH)-one

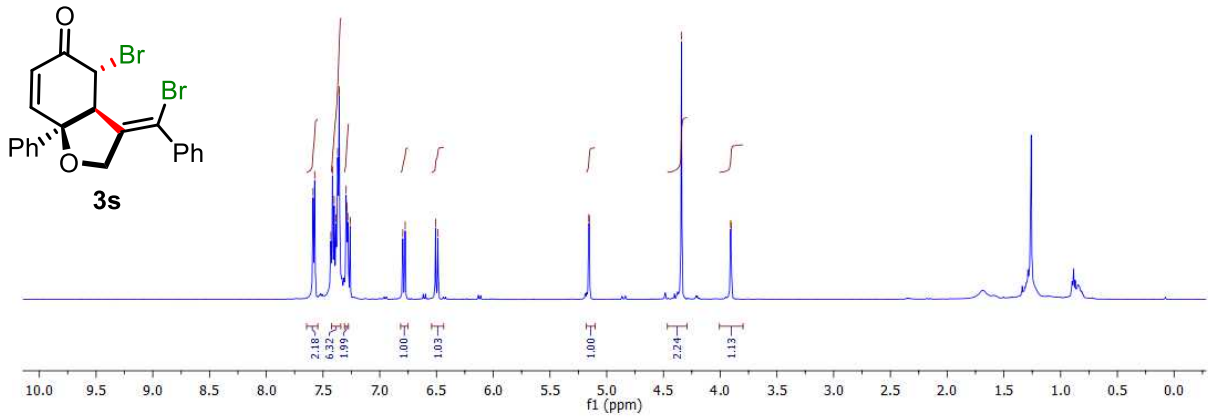

cmv-as-279b-2-13C  
cmv-as-279b-2-13C

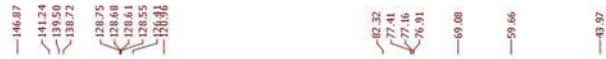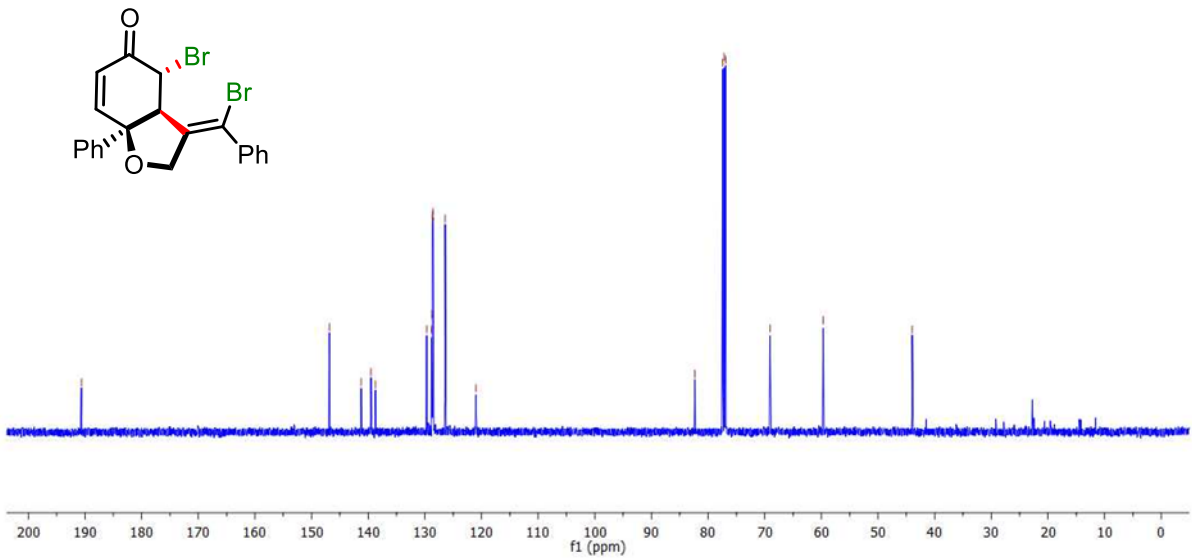

CMRV-AS-284-1H  
CMRV-AS-284-1H

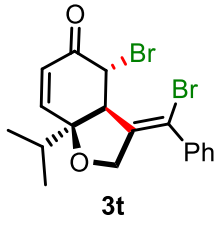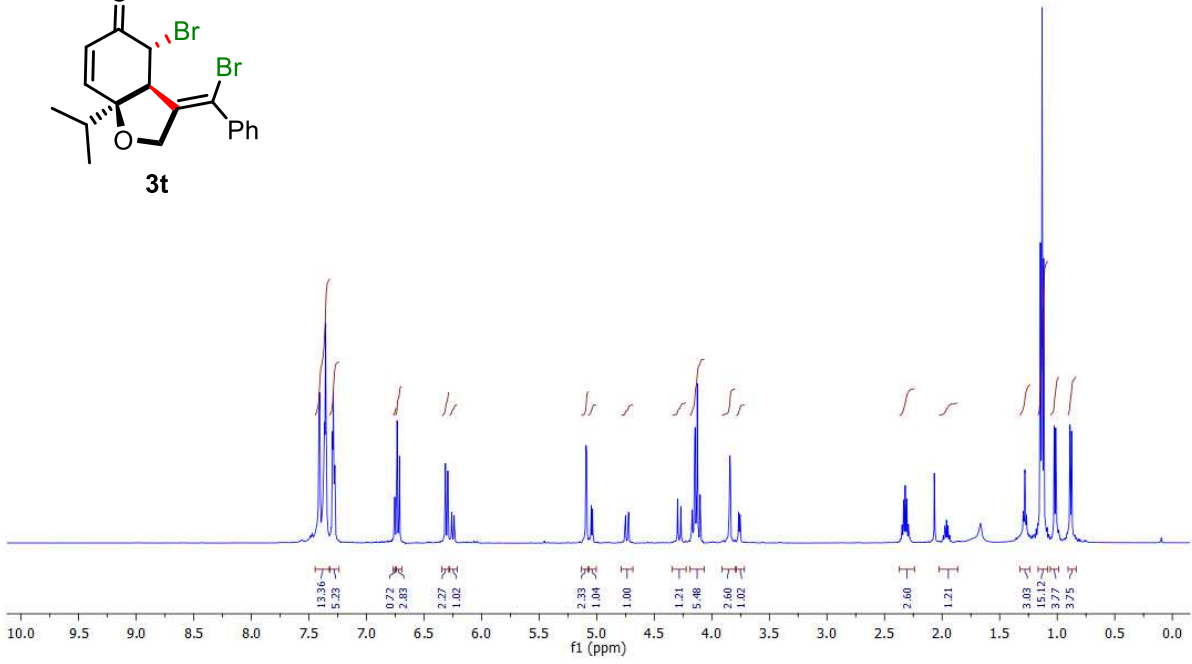

CMRV-AS-541-1H  
CMRV-AS-541-1H

7.33  
7.33  
7.32  
7.31  
7.26  
7.24  
7.24

6.11

5.27  
5.26

3.99  
3.99

2.04  
2.03  
1.76

(E)-4-bromo-3-(bromo(phenyl)methylene)-7,7a-dimethyl-2,3,3a,4-tetrahydrobenzofuran-5(7aH)-one

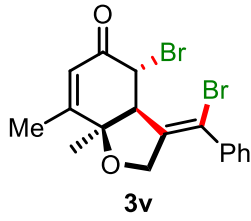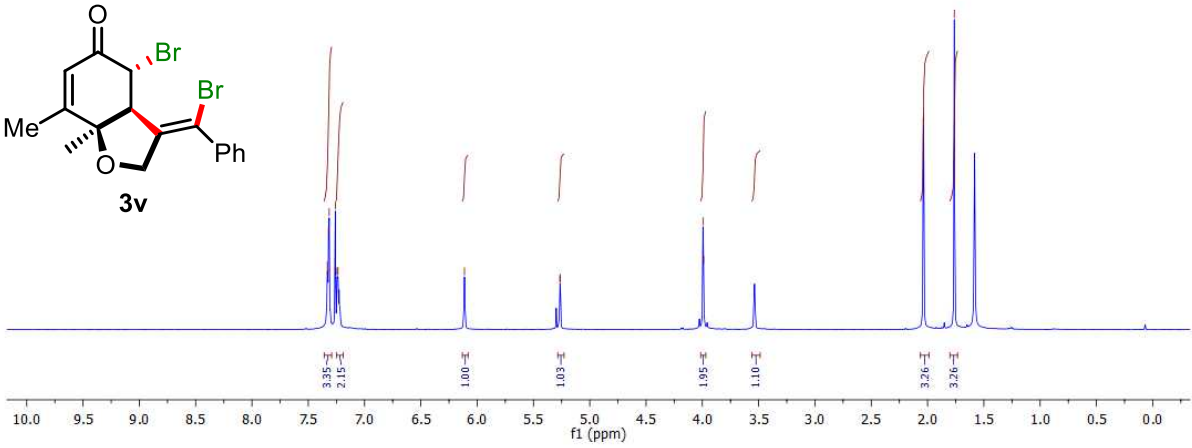

CMRV-AS-541-13C  
CMRV-AS-541-13C

159.78

139.84  
139.01

128.56  
128.55  
128.49  
128.24

120.83

81.66

69.01

58.69

43.77

24.54

18.68

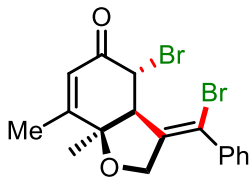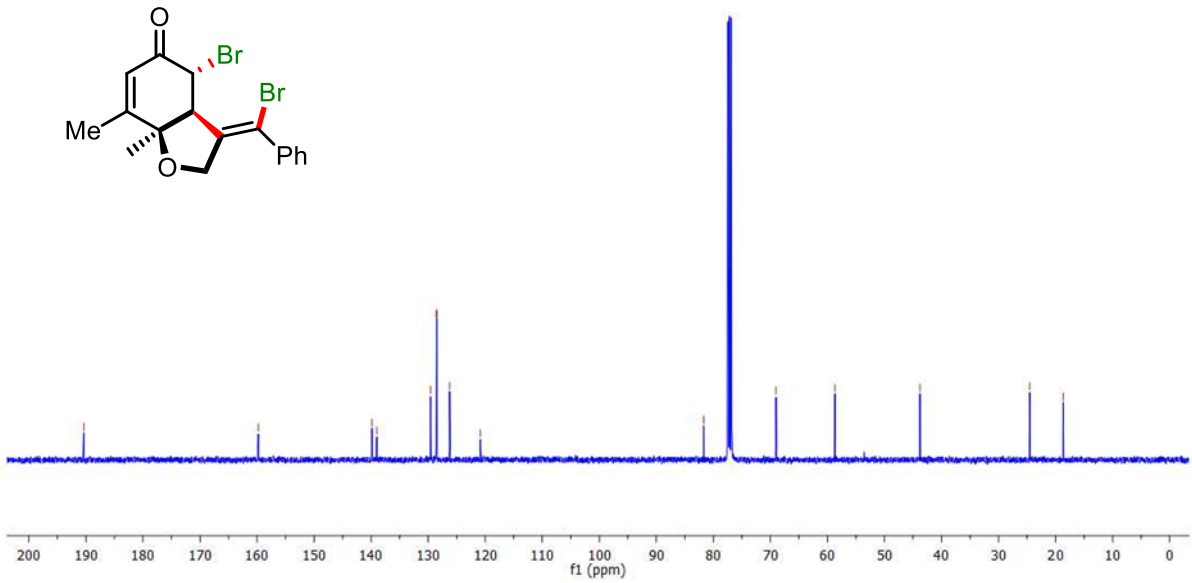

CMRV-AS-560-1H  
CMRV-AS-560-1H

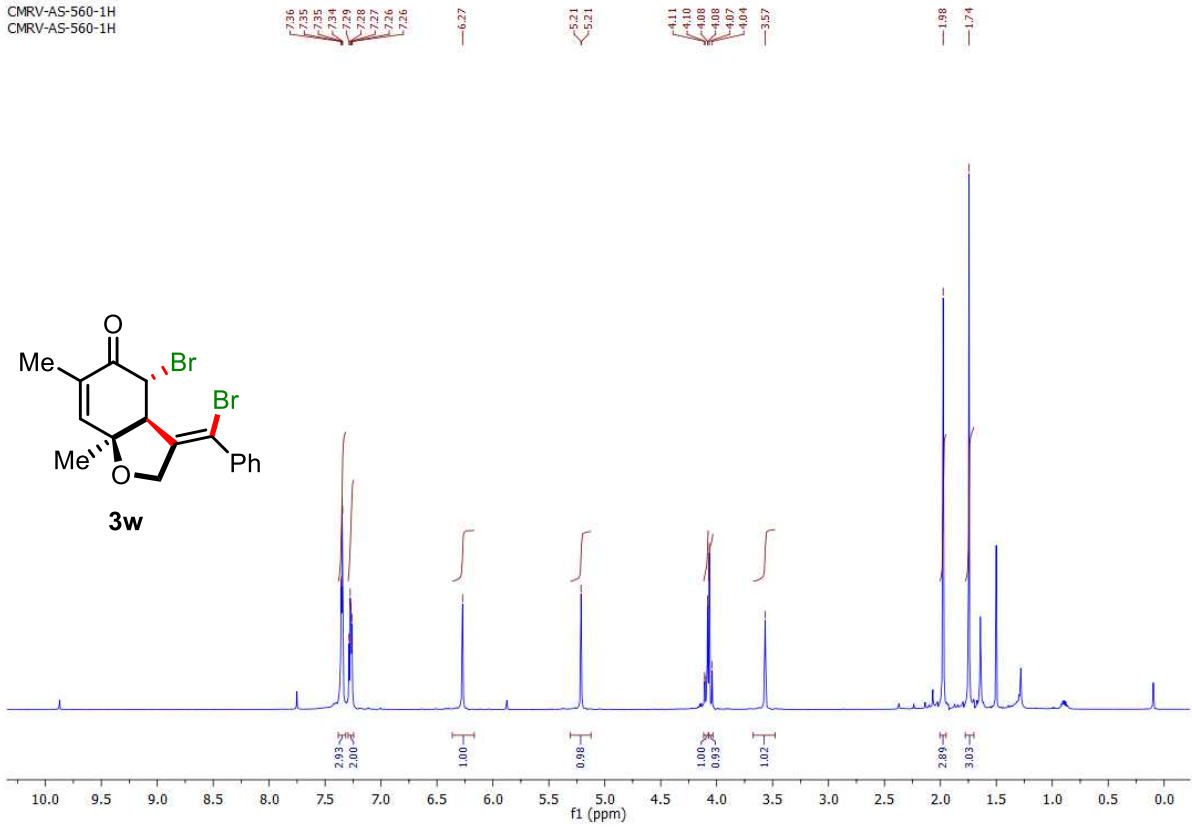

CMRV-AS-560-13C  
CMRV-AS-560-13C

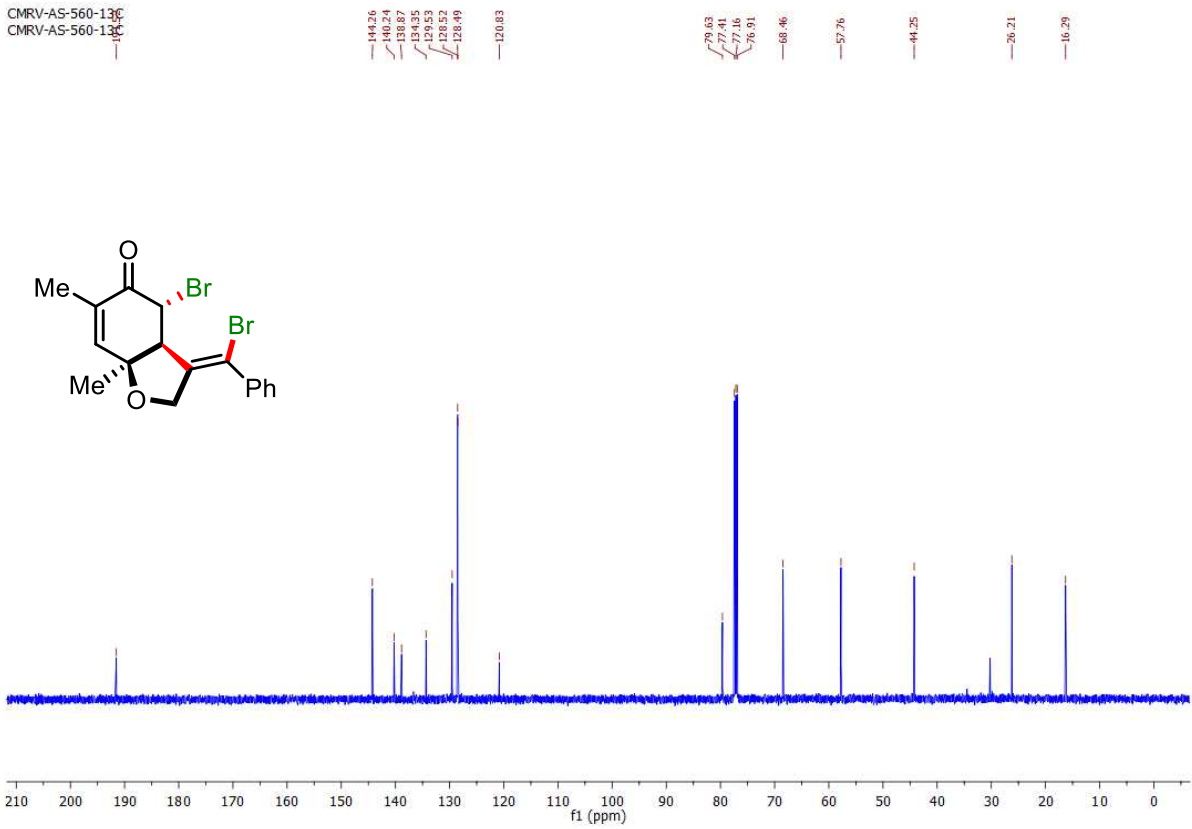

8a-methyl-4-(((1-methyl-4-oxocyclohexa-2,5-dien-1-yl)oxy)methyl)-3,5-diphenyl-5a,8a-dihydro-2H-naphtho[1,8-bc]furan-6(2a1H)-one

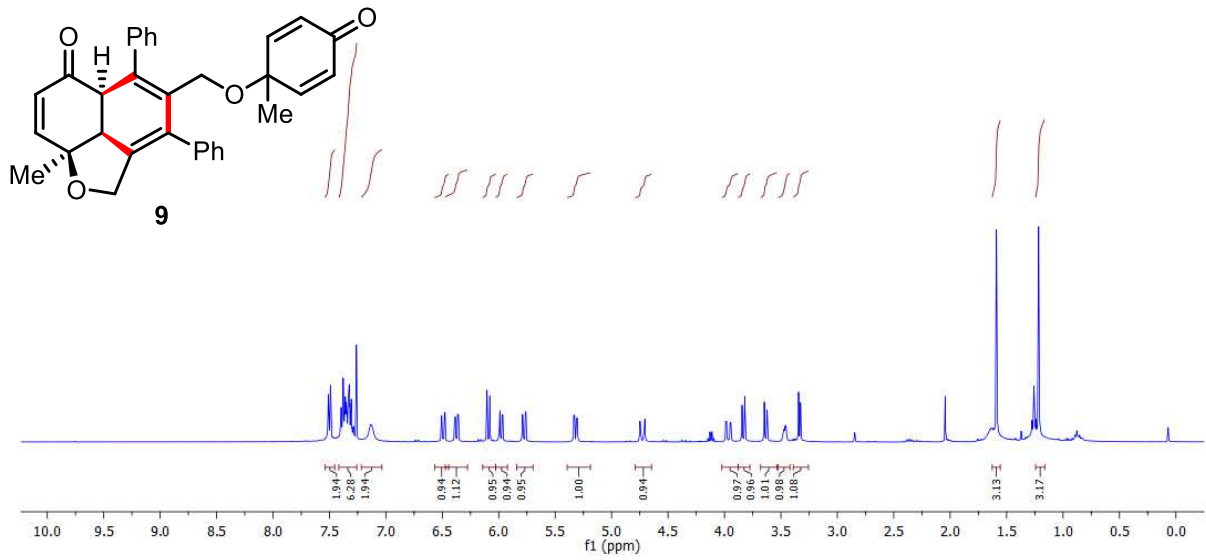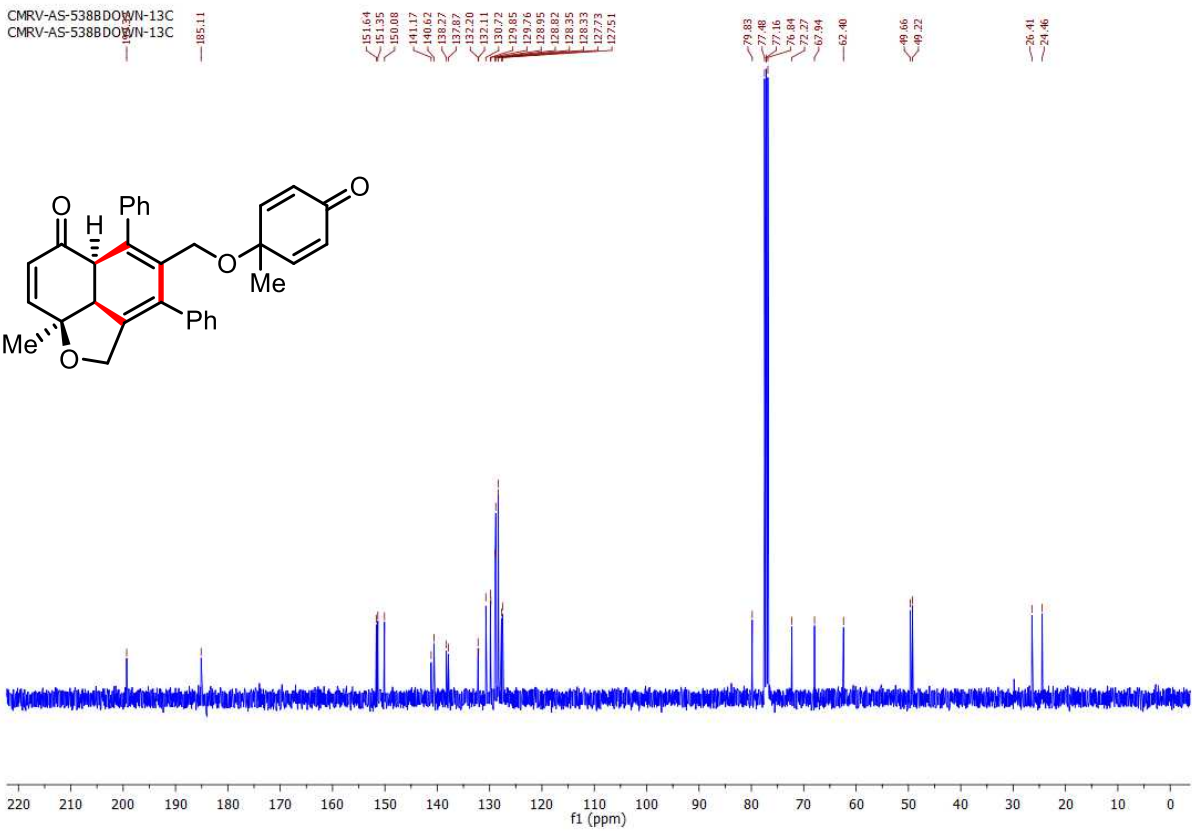

CMRV-AS-514-1H  
CMRV-AS-514-1H

7.42  
7.40  
7.39  
7.38  
7.37  
7.36  
7.21  
7.21  
7.14  
7.12  
6.21  
6.20  
6.18  
6.18  
4.60  
4.57  
4.51  
4.48  
1.47

(E)-3-(bromo(phenyl)methylene)-7a-methyl-  
2,3-dihydrobenzofuran-5(7aH)-one

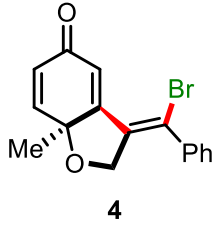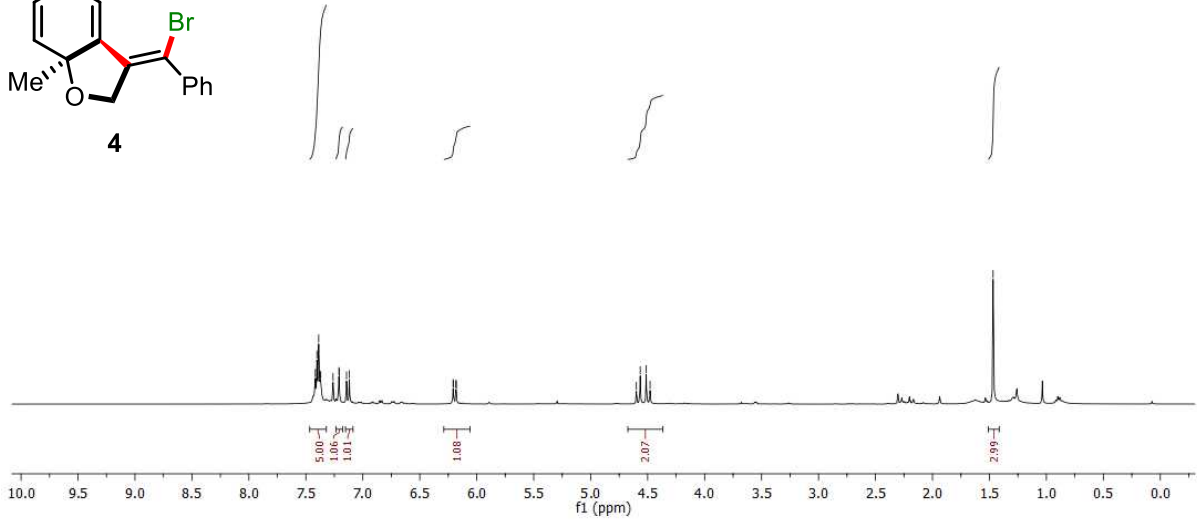

CMRV-AS-514-13C  
CMRV-AS-514-13C

160.51  
148.21  
140.21  
134.16  
129.78  
128.91  
127.90  
127.82  
121.32  
80.73  
70.81  
26.66

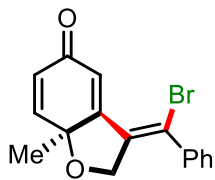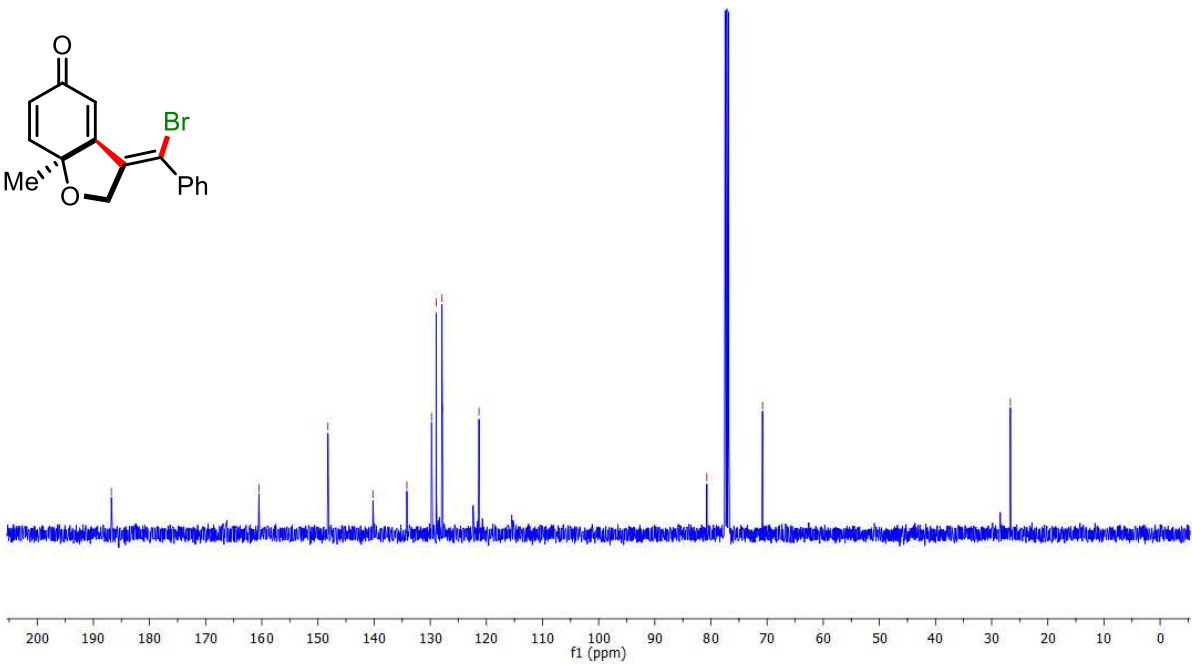

CMRV-AS-513-1H  
CMRV-AS-513-1H

7.39  
7.38  
7.37  
7.36  
7.35  
7.34  
7.32

4.54  
4.51  
4.35  
4.32

3.23  
2.88  
2.87  
2.85  
2.84  
2.64  
2.53  
2.28  
2.26  
2.25  
2.24  
2.23  
2.22  
1.34

(E)-3-(bromo(phenyl)methylene)-7a-methylhexahydrobenzofuran-  
5(6H)-one

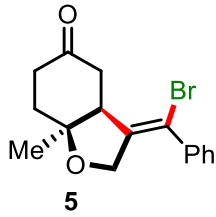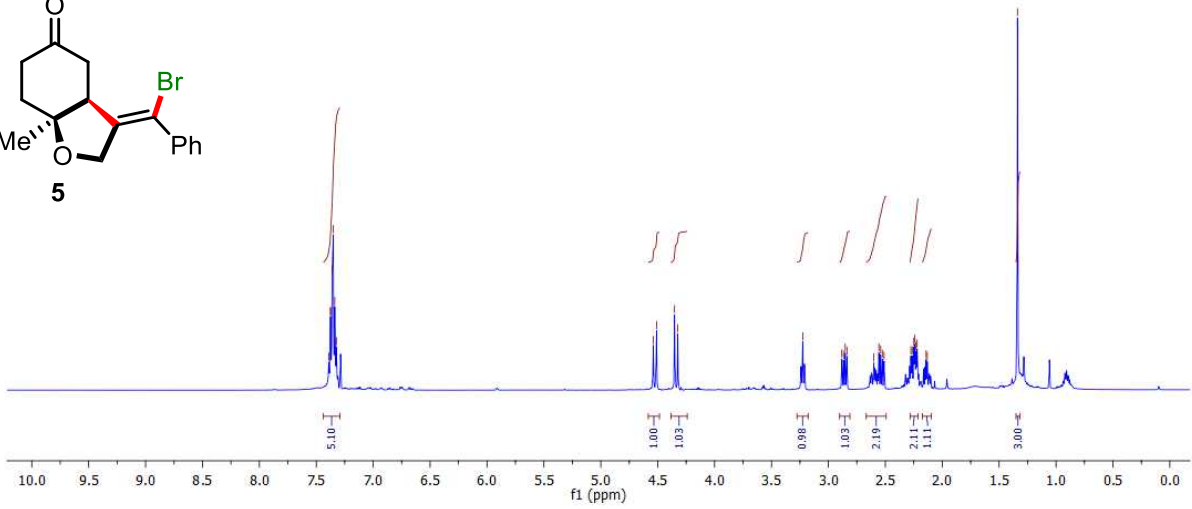

CMRV-AS-513-13C  
CMRV-AS-513-13C

144.44  
139.28  
128.88  
128.60  
128.26  
114.64  
81.04  
68.52  
52.54  
40.29  
33.06  
33.06  
25.69

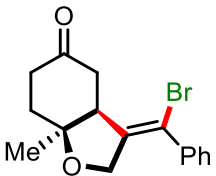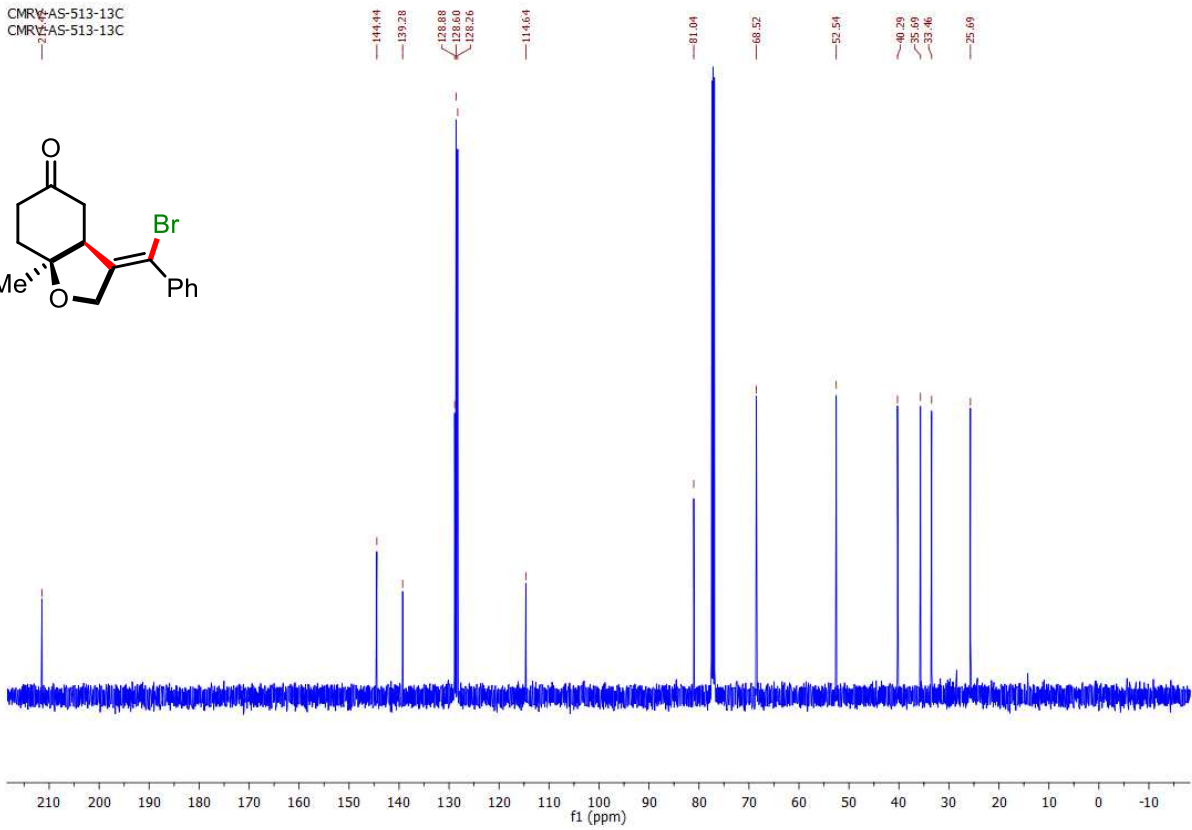

CMRV-AS-REDUCTION-1H  
CMRV-AS-REDUCTION-1H

7.737  
7.735  
7.733  
7.730  
7.728  
7.727  
7.726

5.885  
5.882  
5.559  
5.557  
5.539

4.29  
4.21  
4.18  
4.04  
4.01  
3.53  
3.52

1.59

(3a*S*,4*R*,7a*S*,*E*)-4-bromo-3-(bromo(phenyl)methylene)-7a-methyl-2,3,3a,4,5,7a-hexahydrobenzofuran-5-ol

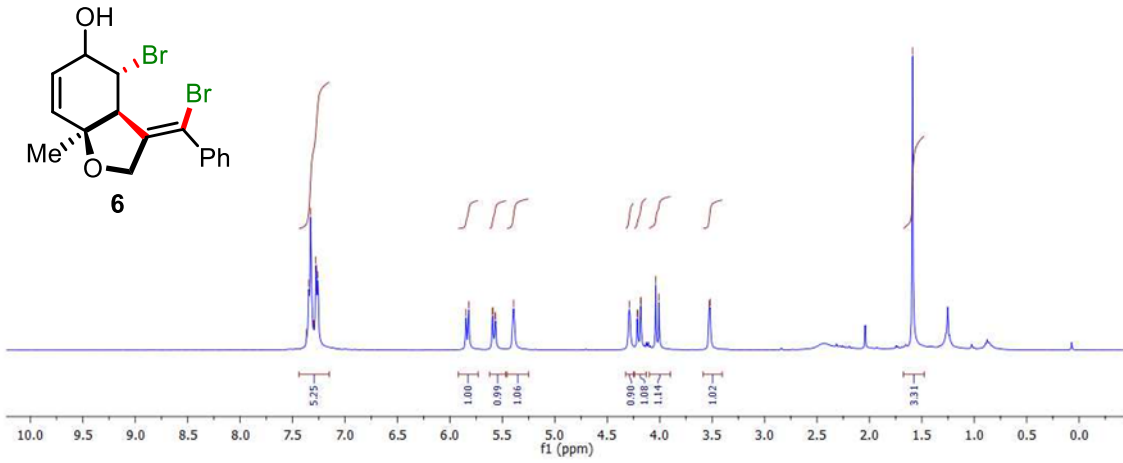

CMRV-AS-REDUCTION-13C  
CMRV-AS-REDUCTION-13C

141.24  
139.08  
131.58  
131.00  
129.33  
128.52  
128.43  
119.07

80.12  
77.86  
77.16  
76.84  
68.55  
65.74  
58.24  
56.31

27.55

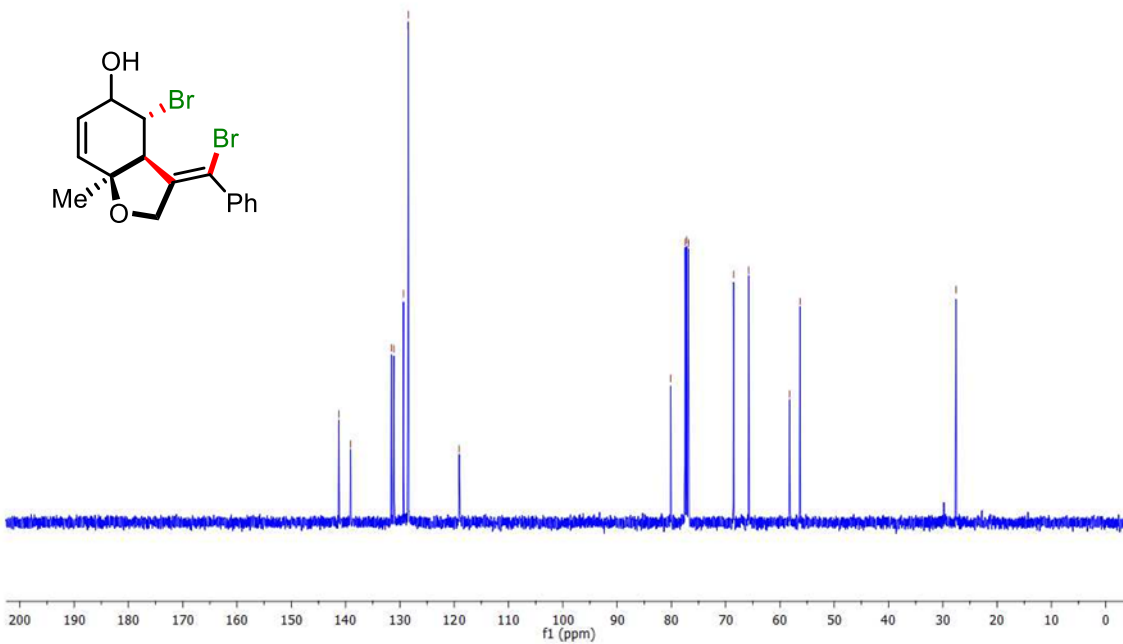



CMRV-AS-546-1H  
CMRV-AS-546-1H

7.337  
7.236  
7.234  
7.233  
7.232  
7.226

4.61  
4.61  
4.58  
4.58  
4.43  
4.40

3.29  
3.25  
2.84  
2.81  
2.79  
2.54  
2.53  
2.51  
2.26  
2.25  
2.23  
2.21  
2.20  
1.31

(E)-3-(chloro(phenyl)methylene)-7a-methylhexahydrobenzofuran-5(6H)-one

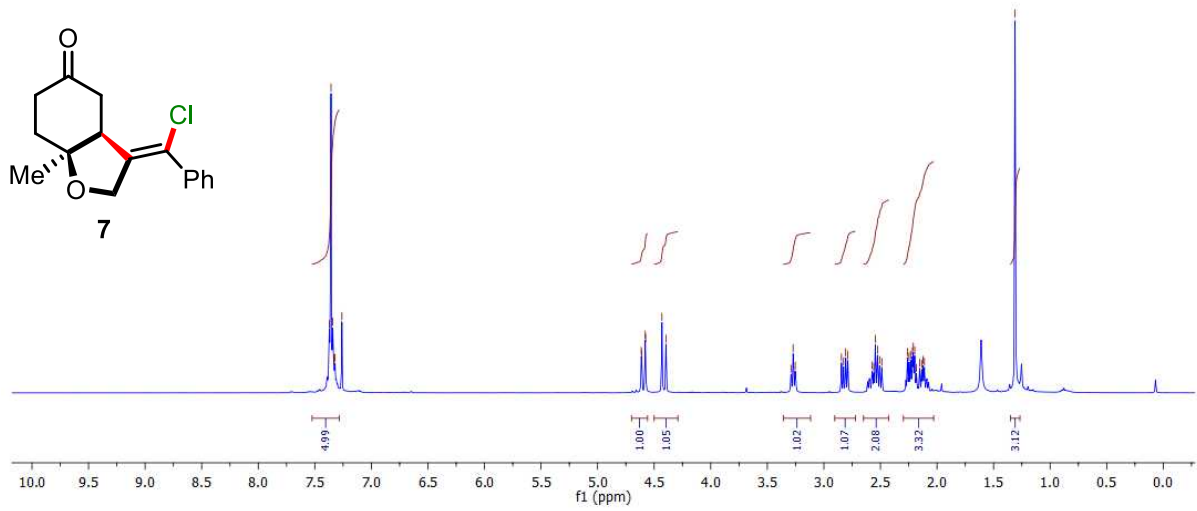

CMRV-AS-546-13C  
CMRV-AS-546-13C

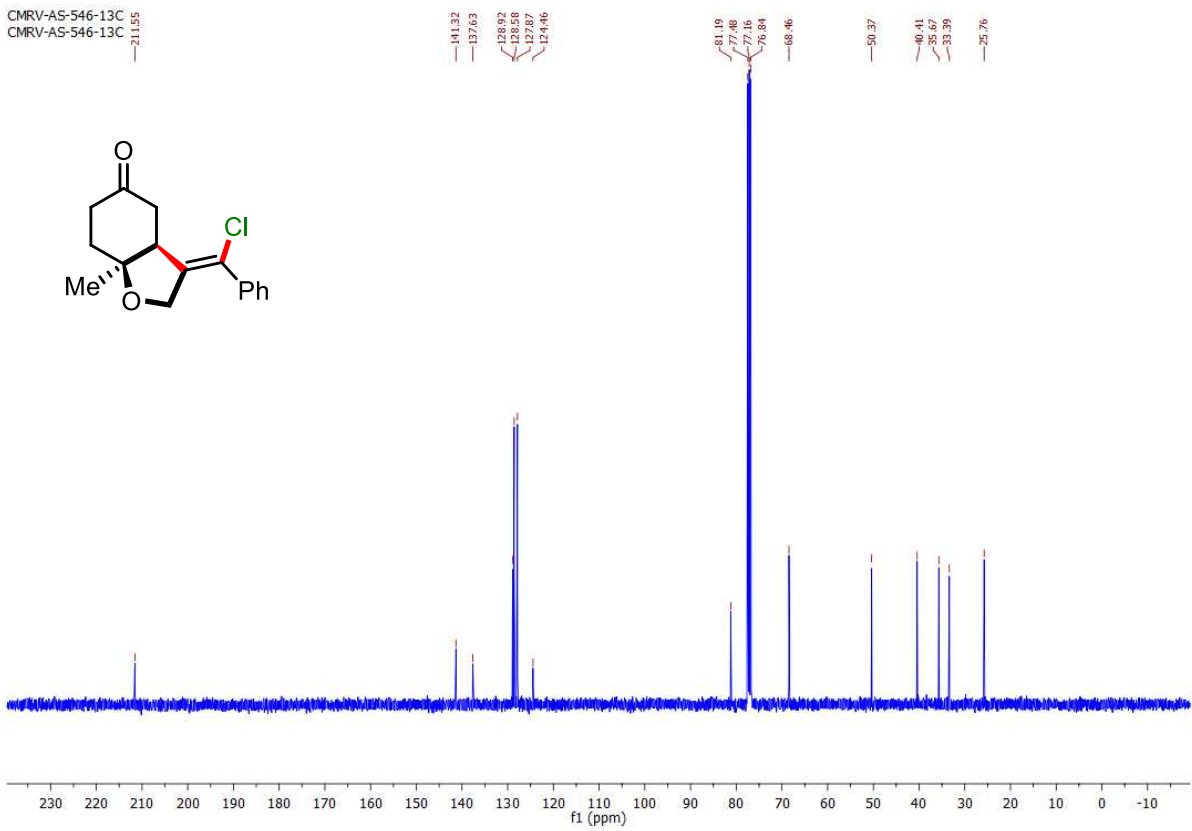

Supplement: c9cc07164d1.pdf [file c9cc07164d1.pdf]
